# Supplementary material for: The sequential reactions of tetrazoles with bromoalkynes for the synthesis of (Z)-N-(2-bromo-1-vinyl)-N-arylcyanamides and 2-arylindoles
Source: Royal Society of Chemistry journal article supplement (doi:10.1039/c3ra40669e), 2013-01-01

## Supporting Information

### The sequential reactions of tetrazoles with bromoalkynes for the synthesis of (Z)-N-(2-bromo-1-vinyl)-N-arylcyanamides and 2-arylindoles

Jiajun Zhang,<sup>a</sup> Ling-Guo Meng,<sup>a</sup> Pinhua Li,<sup>a</sup> and Lei Wang\*<sup>a,b</sup>

<sup>a</sup> *Department of Chemistry, Huaibei Normal University, Huaibei, Anhui 235000, P. R. China.*

*Fax: (+86) 561-380-2047; E-mail: leiwang@chnu.edu.cn*

<sup>b</sup> *State Key Laboratory of Organometallic Chemistry, Shanghai Institute of Organic Chemistry,*

*Chinese Academy of Sciences, Shanghai 200032, P. R. China.*

#### *Table of Contents for Supporting Information*

|                                                                        |    |
|------------------------------------------------------------------------|----|
| 1. General considerations.....                                         | 2  |
| 2. Typical procedures for the reactions.....                           | 2  |
| 3. Characterization data for the products .....                        | 3  |
| 4. References.....                                                     | 17 |
| 5. <sup>1</sup> H and <sup>13</sup> C NMR Spectra of the Products..... | 18 |

## 1. General considerations

All reactions were carried out under air.  $^1\text{H}$  NMR and  $^{13}\text{C}$  NMR spectra were measured on a Bruker Avance NMR spectrometer (400 MHz or 100 MHz, respectively) in  $\text{CDCl}_3$  or DMSO as solvent and recorded in ppm relative to internal tetramethylsilane standard.  $^1\text{H}$  NMR data are reported as follows:  $\delta$ , chemical shift; coupling constants ( $J$  are given in Hertz, Hz) and integration. Abbreviations to denote the multiplicity of a particular signal were s (singlet), d (doublet), t (triplet), q (quartet), m (multiplet), and br (broad singlet). High resolution mass spectroscopy data of the product were collected on an Agilent Technologies 6540 UHD Accurate-Mass Q-TOF LC/MS (ESI). IR spectra were recorded as thin films or as solids in KBr pellets on a Perkin-Elmer FT210 spectrophotometer. Melting points were determined on a digital melting point apparatus and temperatures were uncorrected.

## 2. Typical procedures for the reactions

### 2.1 Typical procedure for the addition reaction of phenol to bromoalkyne

A 10 mL of reaction tube was charged with 1-phenyl-1*H*-tetrazole (**1a**, 0.50 mmol), phenylethynyl bromide (**2a**, 0.75 mmol),  $\text{Ag}_2\text{O}$  (23.2 mg, 0.10 mmol) and DMSO (2.0 mL). The reaction vessel was placed in an oil bath. After the reaction was carried out at 130 °C for 12 h [Ace pressure tube was highly recommended to be employed for safety consideration], it was cooled to room temperature, extracted with EtOAc (3×5.0 mL). The organic layers were combined, dried over  $\text{MgSO}_4$ , and concentrated to yield the crude product, which was further purified by flash chromatography (silica gel, petroleum ether/ethyl acetate= 9:1 to 12:1) to give the desired product **3a**.

### 2.2 Typical procedure for the palladium-catalyzed intramolecular cyclization of (*Z*)-*N*-(2-bromo-1-vinyl)-*N*-arylcyanamides

A 10 mL oven-dried reaction vessel equipped with a magnetic stirrer bar charged with (*Z*)-*N*-(2-bromo-1-phenylvinyl)-*N*-phenylcyanamide (**3a**, 0.50 mmol),  $\text{Pd}(\text{OAc})_2$  (2.8

mg, 0.025 mmol),  $K_2CO_3$  (138.2 mg, 1.0 mmol), and NMP (2.0 mL). The reaction vessel was placed in an oil bath. After the reaction was carried out at 140 °C for 8 h [Ace pressure tube was highly recommended to be employed for safety consideration], it was cooled to room temperature, extracted with EtOAc (3×5.0 mL). The organic layers were combined, dried over  $MgSO_4$ , and concentrated to yield the crude product, which was further purified by flash chromatography (silica gel, petroleum ether/ethyl acetate = 5:1 to 9:1) to give the desired product **4a**.

### 3. Characterization data for the products

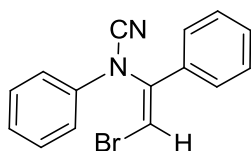

#### **3a: (Z)-N-(2-Bromo-1-phenylvinyl)-N-phenylcyanamide**

Yellow solid, m.p. 65–66 °C.

$^1H$  NMR (400 MHz,  $CDCl_3$ )  $\delta$ : 7.48–7.46 (m, 2H), 7.38–7.36 (m, 3H), 7.34–7.32 (m, 2H), 7.14–7.10 (m, 3H), 7.00 (s, 1H);  $^{13}C$  NMR (100 MHz,  $CDCl_3$ )  $\delta$ : 139.61, 138.28, 133.20, 130.09, 129.75, 129.31, 126.28, 124.56, 116.71, 110.30, 108.17. IR (KBr,  $cm^{-1}$ ): 2226 ( $\nu_{C\equiv N}$ ). HRMS (ESI) ( $[M+H]^+$ ) Calcd. for  $C_{15}H_{12}BrN_2$ : 299.0184, Found: 299.0182.

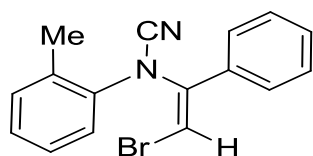

#### **3b: (Z)-N-(2-Bromo-1-phenylvinyl)-N-(p-tolyl)cyanamide**

Yellow oil.

$^1H$  NMR (400 MHz,  $CDCl_3$ )  $\delta$ : 7.47–7.45 (m, 2H), 7.38–7.36 (m, 3H), 7.13 (d,  $J$  = 8.3 Hz, 2H), 7.01 (d,  $J$  = 8.4 Hz, 2H), 6.95 (s, 1H), 2.29 (s, 3H);  $^{13}C$  NMR (100 MHz,  $CDCl_3$ )  $\delta$ : 139.79, 135.82, 134.36, 133.33, 130.26, 130.01, 129.25, 126.35, 116.85, 110.59, 107.64, 20.67. IR (neat): 2224 ( $\nu_{C\equiv N}$ ). HRMS (ESI) ( $[M+H]^+$ ) Calcd. for

C<sub>16</sub>H<sub>14</sub>BrN<sub>2</sub>: 313.0340, Found: 313.0340.

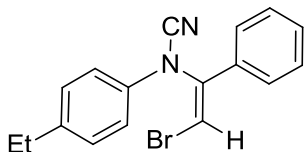

**3c: (Z)-N-(2-Bromo-1-phenylvinyl)-N-(4-ethylphenyl)cyanamide**

Yellow solid, m.p. 43–44 °C.

<sup>1</sup>H NMR (400 MHz, CDCl<sub>3</sub>) δ: 7.49–7.46 (m, 2H), 7.38–7.36 (m, 3H), 7.16–7.14 (m, 2H), 7.05–7.03 (m, 2H), 6.96 (s, 1H), 2.62 (q, *J* = 7.6 Hz, 2H), 1.21 (t, *J* = 7.6 Hz, 3H);  
<sup>13</sup>C NMR (100 MHz, CDCl<sub>3</sub>) δ: 140.67, 139.83, 135.99, 133.38, 129.99, 129.24, 129.07, 126.34, 116.86, 110.58, 107.72, 28.04, 15.36. IR (KBr, cm<sup>-1</sup>): 2221 (ν<sub>C≡N</sub>). HRMS (ESI) ([M+H]<sup>+</sup>) Calcd. for C<sub>17</sub>H<sub>16</sub>BrN<sub>2</sub>: 327.0497, Found: 327.0493.

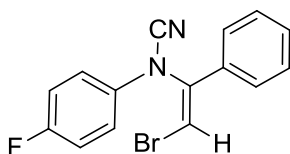

**3d: (Z)-N-(2-Bromo-1-phenylvinyl)-N-(4-fluorophenyl)cyanamide**

Yellow solid, m.p. 84–85 °C.

<sup>1</sup>H NMR (400 MHz, CDCl<sub>3</sub>) δ: 7.46–7.44 (m, 2H), 7.39–7.37 (m, 3H), 7.11–7.08 (m, 2H), 7.04–7.00 (m, 2H), 6.96 (s, 1H); <sup>13</sup>C NMR (100 MHz, CDCl<sub>3</sub>) δ: 159.67 (d, *J*<sub>CF</sub> = 243.3 Hz), 139.83, 134.40 (d, *J*<sub>CF</sub> = 2.93 Hz), 133.04, 130.19, 129.34, 126.35, 118.65 (d, *J*<sub>CF</sub> = 8.2 Hz), 116.61 (d, *J*<sub>CF</sub> = 23.2 Hz), 110.32, 107.75. IR (KBr, cm<sup>-1</sup>): 2225 (ν<sub>C≡N</sub>). HRMS (ESI) ([M+H]<sup>+</sup>) Calcd. for C<sub>15</sub>H<sub>10</sub>BrFN<sub>2</sub>: 317.0090, Found: 317.0085.

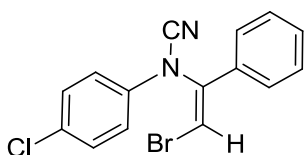

**3e: (Z)-N-(2-Bromo-1-phenylvinyl)-N-(4-chlorophenyl)cyanamide**

Yellow solid, m.p. 93–94 °C.

<sup>1</sup>H NMR (400 MHz, CDCl<sub>3</sub>) δ: 7.46–7.44 (m, 2H), 7.39–7.37 (m, 3H), 7.30–7.28 (m, 2H), 7.07–7.05 (m, 2H), 7.01 (s, 1H); <sup>13</sup>C NMR (100 MHz, CDCl<sub>3</sub>) δ: 139.26, 136.84,

132.71, 130.15, 129.87, 129.70, 129.29, 126.08, 117.89, 109.76, 108.36. IR (KBr,  $\text{cm}^{-1}$ ): 2225 ( $\nu_{\text{C}\equiv\text{N}}$ ). HRMS (ESI) ( $[\text{M}+\text{H}]^+$ ) Calcd. for  $\text{C}_{15}\text{H}_{10}\text{BrClN}_2$ : 332.9794, Found: 332.9792.

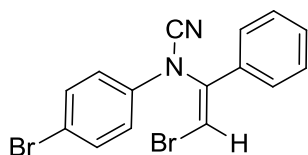

**3f: (Z)-N-(2-bromo-1-phenylvinyl)-N-(4-bromophenyl)cyanamide**

Yellow solid, m.p. 95–96 °C.

$^1\text{H}$  NMR (400 MHz,  $\text{CDCl}_3$ )  $\delta$ : 7.46–7.44 (m, 2H), 7.44–7.43 (m, 2H), 7.41–7.38 (m, 3H), 7.02 (s, 2H), 6.99 (s, 1H);  $^{13}\text{C}$  NMR (100 MHz,  $\text{CDCl}_3$ )  $\delta$ : 139.37, 137.54, 132.84, 132.76, 130.29, 129.42, 126.19, 118.33, 117.50, 109.76, 108.53. IR (KBr,  $\text{cm}^{-1}$ ): 2224 ( $\nu_{\text{C}\equiv\text{N}}$ ). HRMS (ESI) ( $[\text{M}+\text{H}]^+$ ) Calcd. for  $\text{C}_{15}\text{H}_{11}\text{Br}_2\text{N}_2$ : 376.9289, Found: 376.9288.

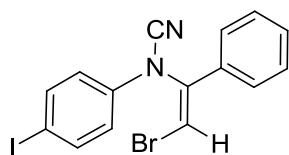

**3g: (Z)-N-(2-Bromo-1-phenylvinyl)-N-(4-iodophenyl)cyanamide**

Yellow solid, m.p. 100–101 °C.

$^1\text{H}$  NMR (400 MHz,  $\text{CDCl}_3$ )  $\delta$ : 7.64–7.62 (m, 2H), 7.45–7.43 (m, 2H), 7.41–7.36 (m, 3H), 7.02 (s, 1H), 6.89 (d,  $J = 8.8$  Hz, 1H);  $^{13}\text{C}$  NMR (100 MHz,  $\text{CDCl}_3$ )  $\delta$ : 139.28, 138.65, 138.30, 132.84, 130.28, 129.42, 126.16, 118.57, 109.64, 108.60, 87.88. IR (KBr,  $\text{cm}^{-1}$ ): 2232 ( $\nu_{\text{C}\equiv\text{N}}$ ). HRMS (ESI) ( $[\text{M}+\text{H}]^+$ ) Calcd. for  $\text{C}_{15}\text{H}_{10}\text{BrIN}_2$ : 424.9150, Found: 424.9148.

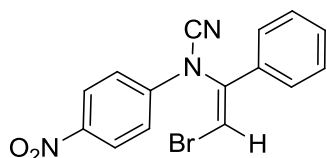

**3h: (Z)-N-(2-Bromo-1-phenylvinyl)-N-(4-nitrophenyl)cyanamide**

Yellow solid, m.p. 104–105 °C.

$^1\text{H}$  NMR (400 MHz,  $\text{CDCl}_3$ )  $\delta$ : 8.24–8.22 (d,  $J = 9.2$  Hz, 2H), 7.47–7.45 (m, 2H),

7.44–7.41 (m, 3H), 7.23 (d,  $J = 9.1$  Hz, 2H), 7.18 (s, 1H);  $^{13}\text{C}$  NMR (100 MHz,  $\text{CDCl}_3$ )  $\delta$ : 144.21, 143.78, 138.86, 132.26, 130.66, 129.66, 125.91, 125.80, 116.29, 110.04, 108.66. IR (KBr,  $\text{cm}^{-1}$ ): 2227 ( $\nu_{\text{C}\equiv\text{N}}$ ). HRMS (ESI) ( $[\text{M}+\text{H}]^+$ ) Calcd. for  $\text{C}_{15}\text{H}_{10}\text{BrN}_3\text{O}_2$ : 344.0035, Found: 344.0036.

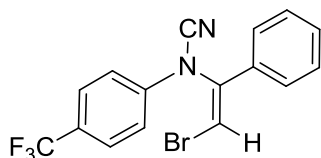

**3i: (Z)-N-(2-Bromo-1-phenylvinyl)-N-(4-(trifluoromethyl)phenyl)cyanamide**

Yellow oil.

$^1\text{H}$  NMR (400 MHz,  $\text{CDCl}_3$ )  $\delta$ : 7.61 (d,  $J = 8.6$  Hz, 2H), 7.48–7.46 (m, 2H), 7.41–7.40 (m, 3H), 7.22 (d,  $J = 8.6$  Hz, 2H), 7.12 (s, 1H);  $^{13}\text{C}$  NMR (100 MHz,  $\text{CDCl}_3$ )  $\delta$ : 141.33, 139.09, 132.64, 130.43, 129.53, 127.15 (q,  $J = 3.8$  Hz), 126.66 (d,  $J = 33.1$  Hz), 126.49, 126.03, 125.13, 122.43, 116.32, 109.34 (q,  $J = 10.6$  Hz). IR (neat): 2229 ( $\nu_{\text{C}\equiv\text{N}}$ ). HRMS (ESI) ( $[\text{M}+\text{H}]^+$ ) Calcd. for  $\text{C}_{16}\text{H}_{11}\text{BrF}_3\text{N}_2$ : 367.0058, Found: 367.0055.

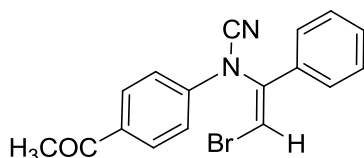

**3j: (Z)-N-(4-Acetylphenyl)-N-(2-bromo-1-phenylvinyl)cyanamide**

Yellow oil.

$^1\text{H}$  NMR (400 MHz,  $\text{CDCl}_3$ )  $\delta$ : 7.96–7.94 (m, 2H), 7.47–7.45 (m, 2H), 7.42–7.36 (m, 3H), 7.19–7.16 (m, 2H), 7.11 (s, 1H), 2.55 (s, 3H);  $^{13}\text{C}$  NMR (100 MHz,  $\text{CDCl}_3$ )  $\delta$ : 196.29, 142.27, 139.11, 133.40, 132.70, 130.37, 129.49, 126.02, 116.01, 109.36, 109.28, 26.43. IR (neat): 2228 ( $\nu_{\text{C}\equiv\text{N}}$ ), 1680 ( $\nu_{\text{C}=\text{O}}$ ). HRMS (ESI) ( $[\text{M}+\text{H}]^+$ ) Calcd. for  $\text{C}_{17}\text{H}_{13}\text{BrN}_2\text{O}$ : 341.0290, Found: 341.0285.

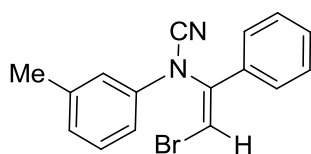

**3k: (Z)-N-(2-Bromo-1-phenylvinyl)-N-(m-tolyl)cyanamid**

Yellow solid, m.p. 81–82 °C.

$^1\text{H}$  NMR (400 MHz,  $\text{CDCl}_3$ )  $\delta$ : 7.49–7.46 (m, 2H), 7.39–7.37 (m, 3H), 7.20 (t,  $J = 7.9$  Hz, 1H), 6.99 (br, 2H), 6.93 (d,  $J = 7.5$  Hz, 1H), 6.88–6.86 (m, 1H), 2.33 (s, 3H);  $^{13}\text{C}$  NMR (100 MHz,  $\text{CDCl}_3$ )  $\delta$ : 140.01, 139.67, 138.22, 133.32, 130.02, 129.49, 129.28, 126.25, 125.43, 117.27, 113.81, 110.43, 108.11, 21.49. IR (KBr,  $\text{cm}^{-1}$ ): 2221 ( $\nu_{\text{C}\equiv\text{N}}$ ). HRMS (ESI) ( $[\text{M}+\text{H}]^+$ ) Calcd. for  $\text{C}_{16}\text{H}_{14}\text{BrN}_2$ : 313.0340, Found: 313.0335.

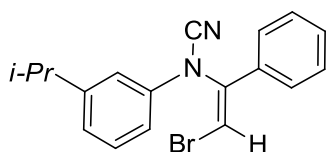

**3l: (Z)-N-(2-bromo-1-phenylvinyl)-N-(3-iso-propylphenyl)cyanamide**

Yellow oil.

$^1\text{H}$  NMR (400 MHz,  $\text{CDCl}_3$ )  $\delta$ : 7.49–7.47 (m, 2H), 7.38–7.36 (m, 3H), 7.27–7.21 (m, 1H), 7.03 (s, 1H), 7.00–7.98 (m, 2H), 6.92–6.90 (m, 1H), 2.92–2.85 (m, 1H), 1.21 (d,  $J = 6.9$  Hz, 6H);  $^{13}\text{C}$  NMR (100 MHz,  $\text{CDCl}_3$ )  $\delta$ : 150.98, 139.81, 138.21, 133.44, 130.01, 129.61, 129.27, 126.37, 122.73, 115.02, 114.18, 110.46, 107.90, 34.09, 23.76. IR (neat): 2222 ( $\nu_{\text{C}\equiv\text{N}}$ ). HRMS (ESI) ( $[\text{M}+\text{H}]^+$ ) Calcd. for  $\text{C}_{18}\text{H}_{18}\text{BrN}_2$ : 341.0653, Found: 341.0651.

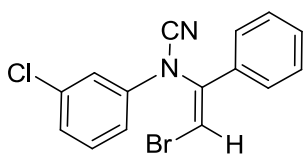

**3m: (Z)-N-(2-Bromo-1-phenylvinyl)-N-(3-chlorophenyl)cyanamide**

Yellow solid, m.p. 72–73 °C.

$^1\text{H}$  NMR (400 MHz,  $\text{CDCl}_3$ )  $\delta$ : 7.47–7.45 (m, 2H), 7.40–7.39 (m, 3H), 7.28–7.24 (m, 1H), 7.14 (s, 1H), 7.11–7.09 (m, 1H), 7.05 (s, 1H), 7.03–7.00 (m, 1H);  $^{13}\text{C}$  NMR (100 MHz,  $\text{CDCl}_3$ )  $\delta$ : 139.48, 139.11, 135.62, 132.69, 130.73, 130.24, 129.37, 126.04, 124.69, 116.71, 114.68, 109.55, 108.89. IR (KBr,  $\text{cm}^{-1}$ ): 2227 ( $\nu_{\text{C}\equiv\text{N}}$ ). HRMS (ESI) ( $[\text{M}+\text{H}]^+$ ) Calcd. for  $\text{C}_{15}\text{H}_{10}\text{BrClN}_2$ : 332.9794, Found: 332.9789.

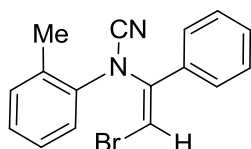

**3n: (Z)-N-(2-Bromo-1-phenylvinyl)-N-(o-tolyl)cyanamide**

Yellow solid, m.p. 75–76 °C.

$^1\text{H}$  NMR (400 MHz,  $\text{CDCl}_3$ )  $\delta$ : 7.47–7.45 (m, 2H), 7.37–7.35 (m, 3H), 7.27–7.24 (m, 1H), 7.18–7.14 (m, 3H), 6.47 (s, 1H), 2.48 (s, 3H);  $^{13}\text{C}$  NMR (100 MHz,  $\text{CDCl}_3$ )  $\delta$ : 142.52, 137.27, 133.78, 132.72, 132.12, 130.07, 128.95, 127.47, 127.38, 127.25, 123.50, 111.35, 101.41, 18.28. IR (KBr,  $\text{cm}^{-1}$ ): 2221 ( $\nu_{\text{C}\equiv\text{N}}$ ). HRMS (ESI) ( $[\text{M}+\text{H}]^+$ ) Calcd. for  $\text{C}_{16}\text{H}_{14}\text{BrN}_2$ : 313.0340, Found: 313.0339.

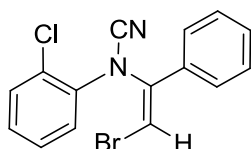

**3o: (Z)-N-(2-Bromo-1-phenylvinyl)-N-(2-chlorophenyl)cyanamide**

Yellow oil.

$^1\text{H}$  NMR (400 MHz,  $\text{CDCl}_3$ )  $\delta$ : 7.51–7.49 (m, 2H), 7.38–7.36 (m, 2H), 7.35–7.33 (m, 3H), 7.25–7.23 (m, 1H), 7.19–7.15 (m, 1H), 6.54 (s, 1H);  $^{13}\text{C}$  NMR (100 MHz,  $\text{CDCl}_3$ )  $\delta$ : 141.90, 135.47, 133.34, 131.33, 130.17, 128.98, 128.95, 128.57, 128.00, 127.45, 125.26, 110.27, 102.08. IR (neat): 2227 ( $\nu_{\text{C}\equiv\text{N}}$ ). HRMS (ESI) ( $[\text{M}+\text{H}]^+$ ) Calcd. for  $\text{C}_{15}\text{H}_{10}\text{BrClN}_2$ : 332.9794, Found: 332.9791.

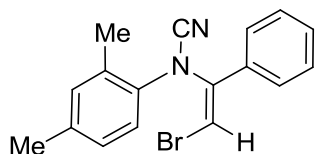

**3p: (Z)-N-(2-Bromo-1-phenylvinyl)-N-(2,4-dimethylphenyl)cyanamide**

Yellow solid, m.p. 95–96 °C.

$^1\text{H}$  NMR (400 MHz,  $\text{CDCl}_3$ )  $\delta$ : 7.47–7.45 (m, 2H), 7.37–7.35 (m, 3H), 7.06–7.03 (m, 1H), 6.96–6.94 (m, 2H), 6.45 (s, 1H), 2.42 (s, 3H), 2.29 (s, 3H);  $^{13}\text{C}$  NMR (100 MHz,  $\text{CDCl}_3$ )  $\delta$ : 142.49, 137.20, 136.98, 133.85, 131.89, 130.02, 129.46, 128.93, 128.30, 127.37, 123.86, 111.47, 101.26, 20.83, 17.81. IR (KBr,  $\text{cm}^{-1}$ ): 2221 ( $\nu_{\text{C}\equiv\text{N}}$ ). HRMS (ESI)



([M+H]<sup>+</sup>) Calcd. for C<sub>17</sub>H<sub>16</sub>BrN<sub>2</sub>: 327.0497, Found: 327.0492.

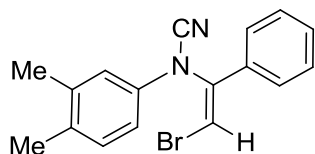

**3q: (Z)-N-(2-Bromo-1-phenylvinyl)-N-(3,4-dimethylphenyl)cyanamide**

Yellow solid, m.p. 86–87 °C.

<sup>1</sup>H NMR (400 MHz, CDCl<sub>3</sub>) δ: 7.48–7.46 (m, 2H), 7.38–7.36 (m, 3H), 7.05 (d, *J* = 8.2 Hz, 1H), 6.97–6.95 (m, 2H), 6.81–6.78 (s, 1H), 3.00 (s, 3H), 2.20 (s, 3H); <sup>13</sup>C NMR (100 MHz, CDCl<sub>3</sub>) δ: 139.81, 138.34, 136.00, 133.45, 133.04, 130.64, 129.94, 129.22, 126.32, 118.03, 114.21, 110.69, 107.64, 19.96, 18.99. IR (KBr, cm<sup>-1</sup>): 2222 (ν<sub>C≡N</sub>). HRMS (ESI) ([M+H]<sup>+</sup>) Calcd. for C<sub>17</sub>H<sub>16</sub>BrN<sub>2</sub>: 327.0497, Found: 327.0497.

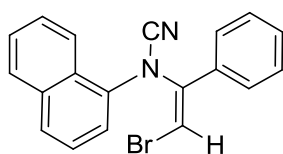

**3r: (Z)-N-(2-Bromo-1-phenylvinyl)-N-(naphthalen-1-yl)cyanamide**

Yellow solid, m.p. 139–141 °C.

<sup>1</sup>H NMR (400 MHz, DMSO) δ: 8.31 (d, *J* = 8.6 Hz, 1H), 7.97 (d, *J* = 8.2 Hz, 1H), 7.87 (d, *J* = 8.0 Hz, 1H), 7.73 (t, *J* = 7.4 Hz, 1H), 7.62–7.60 (m, 1H), 7.58–7.54 (m, 3H), 7.51–7.47 (m, 1H), 7.28–7.27 (m, 3H), 7.23 (s, 1H); <sup>13</sup>C NMR (100 MHz, DMSO) δ: 142.24, 134.61, 134.27, 133.55, 130.40, 129.31, 129.25, 128.81, 127.91, 127.81, 127.40, 127.24, 126.18, 121.92, 121.84, 112.07, 104.62. IR (KBr, cm<sup>-1</sup>): 2223 (ν<sub>C≡N</sub>). HRMS (ESI) ([M+H]<sup>+</sup>) Calcd. for C<sub>19</sub>H<sub>13</sub>BrN<sub>2</sub>: 349.0340, Found: 349.0336.

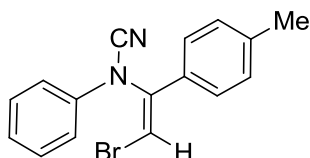

**3s: (Z)-N-(2-Bromo-1-(p-tolyl)vinyl)-N-phenylcyanamide**

White solid, m.p. 109–110 °C.

<sup>1</sup>H NMR (400 MHz, CDCl<sub>3</sub>) δ: 7.38 (s, 1H), 7.36–7.31 (m, 3H), 7.18–7.16 (m, 2H),

7.15–7.10 (m, 3H), 6.94 (s, 1H), 2.33 (s, 3H);  $^{13}\text{C}$  NMR (100 MHz,  $\text{CDCl}_3$ )  $\delta$ : 140.41, 139.64, 138.41, 130.41, 130.01, 129.72, 126.21, 124.49, 116.72, 110.39, 107.06, 21.32. IR (KBr,  $\text{cm}^{-1}$ ): 2225 ( $\nu_{\text{C}\equiv\text{N}}$ ). HRMS (ESI) ( $[\text{M}+\text{H}]^+$ ) Calcd. for  $\text{C}_{16}\text{H}_{13}\text{BrN}_2$ : 313.0340, Found: 313.0336.

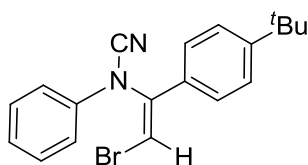

**3t: (Z)-N-(2-Bromo-1-(4-(tert-butyl)phenyl)vinyl)-N-phenylcyanamide**

White solid, m.p. 82–84 °C.

$^1\text{H}$  NMR (400 MHz,  $\text{CDCl}_3$ )  $\delta$ : 7.41–7.39 (m, 4H), 7.37–7.32 (m, 2H), 7.15–7.11 (m, 3H), 6.97 (s, 1H), 1.31 (s, 9H);  $^{13}\text{C}$  NMR (100 MHz,  $\text{CDCl}_3$ )  $\delta$ : 153.53, 139.53, 138.48, 130.31, 129.74, 126.29, 125.94, 124.42, 116.57, 110.42, 107.43, 34.82, 31.11. IR (KBr,  $\text{cm}^{-1}$ ): 2225 ( $\nu_{\text{C}\equiv\text{N}}$ ). HRMS (ESI) ( $[\text{M}+\text{H}]^+$ ) Calcd. for  $\text{C}_{19}\text{H}_{19}\text{BrN}_2$ : 355.0807, Found: 355.0810.

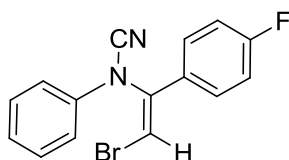

**3u: (Z)-N-(2-Bromo-1-(4-fluorophenyl)vinyl)-N-phenylcyanamide**

Yellow solid, m.p. 108–109 °C.

$^1\text{H}$  NMR (400 MHz,  $\text{CDCl}_3$ )  $\delta$ : 7.48–7.44 (m, 2H), 7.35 (t,  $J = 8.2$  Hz, 2H), 7.15–7.12 (m, 2H), 7.10–7.04 (m, 3H), 6.93 (s, 1H);  $^{13}\text{C}$  NMR (100 MHz,  $\text{CDCl}_3$ )  $\delta$ : 163.62 (d,  $J = 250.0$  Hz), 138.77, 138.10, 129.79, 129.47 (d,  $J = 3.4$  Hz), 128.32 (d,  $J = 8.5$  Hz), 124.73, 116.81, 116.49 (d,  $J = 22.0$  Hz), 110.10, 107.67 (d,  $J = 1.8$  Hz). IR (KBr,  $\text{cm}^{-1}$ ): 2230 ( $\nu_{\text{C}\equiv\text{N}}$ ). HRMS (ESI) ( $[\text{M}+\text{H}]^+$ ) Calcd. for  $\text{C}_{15}\text{H}_{10}\text{BrFN}_2$ : 317.0090, Found: 317.0086.

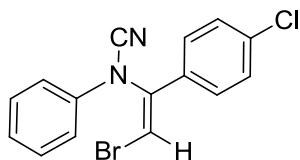

**3v: (Z)-N-(2-Bromo-1-(4-chlorophenyl)vinyl)-N-phenylcyanamide**

Yellow solid, m.p. 113–114 °C.

$^1\text{H}$  NMR (400 MHz,  $\text{CDCl}_3$ )  $\delta$ : 7.41–7.39 (m, 2H), 7.35–7.34 (m, 3H), 7.33–7.32 (m, 1H), 7.15–7.14 (m, 2H), 7.11–7.09 (m, 2H), 7.00 (s, 1H);  $^{13}\text{C}$  NMR (100 MHz,  $\text{CDCl}_3$ )  $\delta$ : 138.73, 138.04, 136.18, 131.75, 129.83, 129.60, 127.54, 124.78, 116.76, 110.03, 108.61. IR (KBr,  $\text{cm}^{-1}$ ): 2227 ( $\nu_{\text{C}\equiv\text{N}}$ ). HRMS (ESI) ( $[\text{M}+\text{H}]^+$ ) Calcd. for  $\text{C}_{15}\text{H}_{10}\text{BrClN}_2$ : 332.9794, Found: 332.9792.

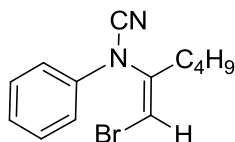

**3w: (Z)-N-(1-bromohept-1-en-2-yl)-N-phenylcyanamide**

Colorless oil.

$^1\text{H}$  NMR (400 MHz,  $\text{CDCl}_3$ )  $\delta$ : 7.42–7.38 (m, 2H), 7.20–7.16 (m, 1H), 7.13–7.11 (m, 2H), 6.41 (s, 1H), 2.37 (t,  $J = 7.4$  Hz, 2H), 1.56–1.50 (m, 2H), 1.32–1.30 (m, 4H), 0.90–0.87 (m, 3H);  $^{13}\text{C}$  NMR (100 MHz,  $\text{CDCl}_3$ )  $\delta$ : 140.27, 137.68, 129.74, 124.72, 117.21, 110.38, 106.08, 33.66, 30.92, 26.31, 22.21, 13.82. IR (neat): 2221 ( $\nu_{\text{C}\equiv\text{N}}$ ). HRMS (ESI) ( $[\text{M}+\text{H}]^+$ ) Calcd. for  $\text{C}_{14}\text{H}_{17}\text{BrN}_2$ : 293.0653, Found: 295.0649.

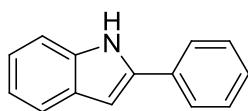

**4a: 2-Phenyl-1H-indole<sup>[1]</sup>**

$^1\text{H}$  NMR (400 MHz,  $\text{CDCl}_3$ )  $\delta$ : 8.36 (br, 1H), 7.69–7.68 (m, 3H), 7.49–7.45 (m, 2H), 7.43–7.41 (m, 1H), 7.38–7.34 (m, 1H), 7.27–7.23 (m, 1H), 7.20–7.16 (m, 1H), 6.87 (s, 1H);  $^{13}\text{C}$  NMR (100 MHz,  $\text{CDCl}_3$ )  $\delta$ : 137.93, 136.87, 132.41, 129.31, 129.04, 127.73, 125.20, 122.38, 120.70, 120.30, 110.96, 100.01.

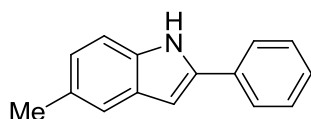

**4b: 5-Methyl-2-phenyl-1H-indole**<sup>[2]</sup>

<sup>1</sup>H NMR (400 MHz, CDCl<sub>3</sub>) δ: 8.25 (br, 1H), 7.68–7.66 (m, 2H), 7.48–7.44 (m, 3H), 7.36–7.30 (m, 2H), 7.07–7.05 (m, 1H), 6.78 (d, *J* = 1.3 Hz, 1H), 2.49 (s, 3H); <sup>13</sup>C NMR (100 MHz, CDCl<sub>3</sub>) δ: 137.98, 135.22, 132.55, 129.59, 129.49, 129.00, 127.58, 125.09, 124.00, 120.33, 110.59, 99.58, 21.49.

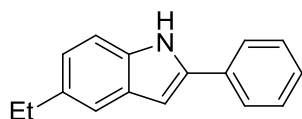

**4c: 5-Ethyl-2-phenyl-1H-indole**<sup>[3]</sup>

<sup>1</sup>H NMR (400 MHz, CDCl<sub>3</sub>) δ: 8.25 (br, 1H), 7.69–7.67 (m, 2H), 7.50–7.45 (m, 3H), 7.37–7.33 (m, 2H), 7.13–7.11 (s, 1H), 6.82 (s, 1H), 2.83 (q, *J* = 7.4 Hz, 2H), 1.37 (t, *J* = 7.1 Hz, 3H); <sup>13</sup>C NMR (100 MHz, CDCl<sub>3</sub>) δ: 138.05, 136.29, 135.41, 132.60, 129.57, 129.02, 127.59, 125.13, 123.04, 119.12, 110.72, 99.76, 29.06, 16.47.

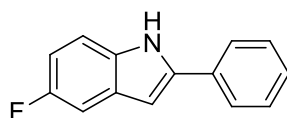

**4d: 5-Fluoro-2-phenyl-1H-indole**<sup>[2]</sup>

<sup>1</sup>H NMR (400 MHz, CDCl<sub>3</sub>) δ: 8.34 (br, 1H), 7.67–7.65 (m, 2H), 7.48 (t, *J* = 7.5 Hz, 2H), 7.38–7.34 (m, 1H), 7.33–7.27 (m, 2H), 6.98–6.93 (m, 1H), 6.80 (s, 1H); <sup>13</sup>C NMR (100 MHz, CDCl<sub>3</sub>) δ: 158.22 (d, *J*<sub>CF</sub> = 233.4 Hz), 139.69, 133.35, 132.06, 129.65 (d, *J*<sub>CF</sub> = 9.8 Hz), 129.08, 128.03, 125.21, 111.47 (d, *J*<sub>CF</sub> = 9.7 Hz), 110.63 (d, *J*<sub>CF</sub> = 26.3 Hz), 105.38 (d, *J*<sub>CF</sub> = 23.4 Hz), 100.08 (d, *J*<sub>CF</sub> = 4.7 Hz).

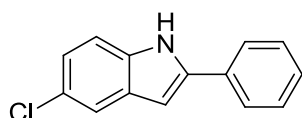

**4e: 5-Chloro-2-phenyl-1H-indole**<sup>[1]</sup>

<sup>1</sup>H NMR (400 MHz, CDCl<sub>3</sub>) δ: 8.38 (br, 1H), 7.67–7.65 (m, 2H), 7.60 (d, *J* = 1.3 Hz, 1H), 7.48–7.45 (m, 2H), 7.38–7.34 (s, 1H), 7.32–7.30 (s, 1H), 7.17–7.14 (m, 1H), 6.77

(d,  $J = 1.3$  Hz, 1H);  $^{13}\text{C}$  NMR (100 MHz,  $\text{CDCl}_3$ )  $\delta$ : 139.31, 135.15, 131.89, 130.35, 129.09, 128.11, 125.87, 125.24, 122.57, 119.98, 111.84, 99.57.

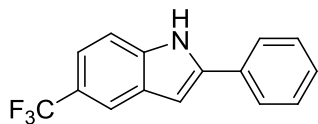

**4i: 2-Phenyl-5-(trifluoromethyl)-1H-indole**<sup>[2]</sup>

$^1\text{H}$  NMR (400 MHz,  $\text{CDCl}_3$ )  $\delta$ : 8.55 (br, 1H), 7.94 (s, 1H), 7.69–7.67 (m, 2H), 7.50–7.47 (m, 2H), 7.45–7.43 (m, 2H), 7.41–7.37 (m, 1H), 6.90 (d,  $J = 1.2$  Hz, 1H);  $^{13}\text{C}$  NMR (100 MHz,  $\text{CDCl}_3$ )  $\delta$ : 139.68, 138.06, 131.66, 129.16, 128.62, 128.33, 126.66, 125.33, 123.97, 119.00 (d,  $J_{\text{CF}} = 3.6$  Hz), 118.31 (d,  $J_{\text{CF}} = 4.2$  Hz), 111.07, 100.56.

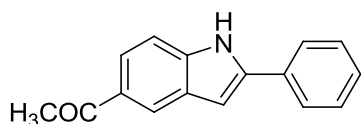

**4j: 1-(2-Phenyl-1H-indol-5-yl)ethanone**<sup>[4]</sup>

$^1\text{H}$  NMR (400 MHz, DMSO)  $\delta$ : 11.93 (br, 1H), 8.26 (m, 1H), 7.89–7.87 (m, 2H), 7.77–7.75 (m, 1H), 7.50–7.45 (s, 3H), 7.35–7.32 (s, 1H), 7.04 (s, 1H), 2.60 (s, 3H);  $^{13}\text{C}$  NMR (100 MHz, DMSO)  $\delta$ : 202.57, 144.96, 144.68, 136.84, 134.57, 134.18, 133.36, 133.09, 130.40, 127.56, 126.87, 116.39, 105.41, 31.77.

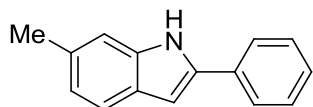

**4k: 6-Methyl-2-phenyl-1H-indole**<sup>[5]</sup>

$^1\text{H}$  NMR (400 MHz,  $\text{CDCl}_3$ )  $\delta$ : 8.22 (br, 1H), 7.67–7.65 (m, 2H), 7.54 (d,  $J = 8.0$  Hz, 1H), 7.46 (t,  $J = 7.5$  Hz, 2H), 7.35–7.31 (m, 1H), 7.20 (s, 1H), 7.00–6.98 (m, 1H), 6.80 (d,  $J = 1.3$  Hz, 1H), 2.50 (s, 3H);  $^{13}\text{C}$  NMR (100 MHz,  $\text{CDCl}_3$ )  $\delta$ : 137.33, 137.25, 132.59, 132.25, 128.98, 127.45, 127.11, 124.98, 122.07, 120.30, 110.86, 99.85, 21.80.

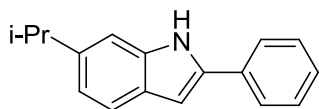

**4l: 6-(*iso*-Propyl)-2-phenyl-1*H*-indole**

White solid, m.p. 165.5–166.1 °C.

$^1\text{H}$  NMR (400 MHz,  $\text{CDCl}_3$ )  $\delta$ : 8.24 (br, 1H), 7.69–7.67 (m, 2H), 7.62–7.60 (m, 1H), 7.49 (t,  $J = 7.5$  Hz, 2H), 7.38–7.34 (m, 1H), 7.29 (s, 1H), 7.11–7.09 (m, 1H), 6.84 (d,  $J = 0.8$  Hz, 1H), 3.12–3.05 (m, 1H), 1.40–1.38 (m, 6H);  $^{13}\text{C}$  NMR (100 MHz,  $\text{CDCl}_3$ )  $\delta$ : 143.76, 137.51, 137.29, 132.68, 129.03, 127.51, 127.48, 125.05, 120.44, 119.77, 108.17, 99.89, 34.46, 24.51. HRMS (ESI) ( $[\text{M}+\text{H}]^+$ ) Calcd. for  $\text{C}_{17}\text{H}_{16}\text{N}$ : 235.1361, Found: 235.1360.

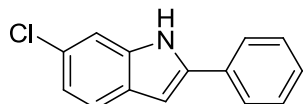

**4m: 6-Chloro-2-phenyl-1*H*-indole<sup>[1]</sup>**

$^1\text{H}$  NMR (400 MHz, DMSO)  $\delta$ : 11.70 (br, 1H), 7.84 (m,  $J = 7.6$  Hz, 2H), 7.53 (d,  $J = 8.4$  Hz, 1H), 7.47 (t,  $J = 7.6$  Hz, 2H), 7.42 (s, 1H), 7.34–7.30 (m, 1H), 7.02–7.00 (m, 1H), 6.91 (d,  $J = 0.90$  Hz, 1H);  $^{13}\text{C}$  NMR (100 MHz, DMSO)  $\delta$ : 139.26, 137.98, 132.23, 129.39, 128.17, 127.91, 126.53, 125.55, 121.82, 120.19, 111.27, 99.26.

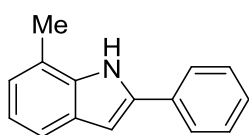

**4n: 7-Methyl-2-phenyl-1*H*-indole<sup>[5]</sup>**

$^1\text{H}$  NMR (400 MHz,  $\text{CDCl}_3$ )  $\delta$ : 8.26 (br, 1H), 7.77–7.76 (m, 2H), 7.61 (d,  $J = 7.7$  Hz, 1H), 7.54 (t,  $J = 7.5$  Hz, 2H), 7.43–7.40 (m, 1H), 7.19–7.16 (m, 1H), 7.12–7.10 (m, 1H), 6.93 (d,  $J = 2.0$  Hz, 1H), 2.62 (s, 3H);  $^{13}\text{C}$  NMR (100 MHz,  $\text{CDCl}_3$ )  $\delta$ : 137.74, 136.55, 132.65, 129.08, 128.96, 127.71, 125.29, 123.06, 120.58, 120.16, 118.53, 100.71, 16.77.

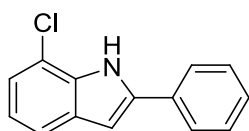

**4o: 7-Chloro-2-phenyl-1H-indole**<sup>[6]</sup>

<sup>1</sup>H NMR (400 MHz, CDCl<sub>3</sub>) δ: 8.52 (br, 1H), 7.72–7.70 (m, 2H), 7.56–7.54 (m, 1H), 7.50 (t, *J* = 7.6 Hz, 2H), 7.40–7.35 (m, 1H), 7.27–7.21 (m, 1H), 7.11–7.07 (m, 1H), 6.87 (d, *J* = 2.1 Hz, 1H); <sup>13</sup>C NMR (100 MHz, CDCl<sub>3</sub>) δ: 138.69, 134.09, 131.81, 130.62, 129.11, 128.18, 125.37, 121.62, 121.04, 119.25, 116.35, 100.82.

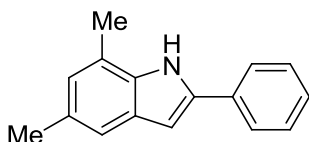

**4p: 5,7-Dimethyl-2-phenyl-1H-indole**<sup>[7]</sup>

<sup>1</sup>H NMR (400 MHz, CDCl<sub>3</sub>) δ: 8.19 (br, 1H), 7.75–7.74 (m, 2H), 7.52 (t, *J* = 7.5 Hz, 3H), 7.41–7.36 (m, 1H), 6.93 (s, 1H), 6.84 (d, *J* = 1.8 Hz, 1H), 2.58 (s, 3H), 2.53 (s, 3H); <sup>13</sup>C NMR (100 MHz, CDCl<sub>3</sub>) δ: 137.79, 134.90, 132.79, 129.74, 129.24, 129.03, 127.55, 125.18, 124.84, 119.78, 118.07, 100.24, 21.49, 16.71.

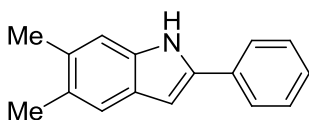

**4q: 5,6-Dimethyl-2-phenyl-1H-indole**<sup>[8]</sup>

<sup>1</sup>H NMR (400 MHz, CDCl<sub>3</sub>) δ: 8.15 (br, 1H), 7.66–7.64 (m, 2H), 7.46–7.41 (m, 3H), 7.34–7.30 (m, 1H), 7.18 (s, 1H), 6.75 (d, *J* = 1.0 Hz, 1H), 2.40 (s, 3H), 2.38 (s, 3H); <sup>13</sup>C NMR (100MHz, CDCl<sub>3</sub>) δ: 137.08, 135.93, 132.72, 131.50, 128.95, 128.89, 127.70, 127.31, 124.92, 120.71, 111.30, 99.42, 20.52, 20.07.

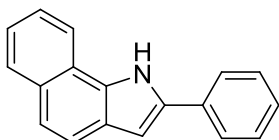

**4r: 2-Phenyl-1H-benzo[g]indole**<sup>[2]</sup>

<sup>1</sup>H NMR (400 MHz, CDCl<sub>3</sub>) δ: 9.07 (br, 1H), 8.10–8.08 (m, 1H), 7.96–7.94 (m, 1H), 7.76–7.72 (m, 3H), 7.58–7.54 (m, 2H), 7.51–7.43 (m, 3H), 7.37–7.33 (m, 1H), 6.98 (d, *J* = 2.0 Hz, 1H); <sup>13</sup>C NMR (100 MHz, CDCl<sub>3</sub>) δ: 136.28, 132.56, 131.42, 130.62,

129.09, 129.02, 127.41, 125.56, 125.35, 124.99, 123.95, 121.63, 121.20, 120.62, 119.35, 101.72.

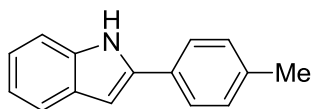

**4s: 2-(*p*-Tolyl)-1*H*-indole**<sup>[1]</sup>

<sup>1</sup>H NMR (400 MHz, CDCl<sub>3</sub>) δ: 8.30 (br, 1H), 7.67–7.65 (m, 1H), 7.59–7.57 (m, 2H), 7.42–7.40 (m, 1H), 7.29–7.27 (m, 2H), 7.24–7.20 (m, 1H), 7.18–7.14 (m, 1H), 6.82 (s, 1H), 2.43 (s, 3H); <sup>13</sup>C NMR (100 MHz, CDCl<sub>3</sub>) δ: 138.09, 137.65, 136.74, 129.72, 129.62, 129.38, 125.09, 122.14, 120.54, 120.22, 110.82, 99.44, 21.23.

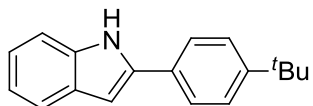

**4t: 2-(4-(*tert*-Butyl)phenyl)-1*H*-indole**<sup>[9]</sup>

<sup>1</sup>H NMR (400 MHz, CDCl<sub>3</sub>) δ: 8.33 (br, 1H), 7.67–7.64 (m, 2H), 7.62 (s, 1H), 7.51–7.48 (m, 2H), 7.42 (d, *J* = 7.9 Hz, 1H), 7.24–7.20 (m, 1H), 7.17–7.13 (m, 1H), 6.83 (s, 1H), 1.40 (s, 9H); <sup>13</sup>C NMR (100 MHz, CDCl<sub>3</sub>) δ: 150.91, 138.03, 136.77, 129.61, 129.40, 125.96, 124.93, 122.12, 120.55, 120.19, 110.84, 99.54, 34.67, 31.29.

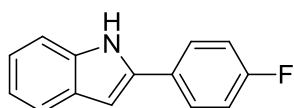

**4u: 2-(4-Fluorophenyl)-1*H*-indole**<sup>[1]</sup>

<sup>1</sup>H NMR (400 MHz, DMSO) δ: 11.53 (br, 1H), 7.91–7.87 (m, 2H), 7.53(d, *J* = 7.8 Hz, 1H), 7.42 (d, *J* = 8.0 Hz, 1H), 7.30 (t, *J* = 8.8 Hz, 2H), 7.13–7.09 (m, 1H), 7.02–6.99 (m, 1H), 6.84 (d, *J* = 0.8 Hz, 1H); <sup>13</sup>C NMR (100 MHz, DMSO) δ: 162.02 (d, *J*<sub>CF</sub> = 243.1 Hz), 137.62, 137.20, 129.36 (d, *J*<sub>CF</sub> = 3.1 Hz), 129.14, 127.44 (d, *J*<sub>CF</sub> = 8.1 Hz), 122.04, 120.50, 119.88, 116.24 (d, *J*<sub>CF</sub> = 21.5 Hz), 111.75, 99.13 (d, *J*<sub>CF</sub> = 1.2 Hz).



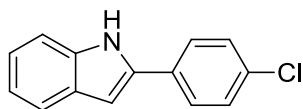

**4v: 2-(4-Chlorophenyl)-1H-indole**<sup>[1]</sup>

<sup>1</sup>H NMR (400 MHz, DMSO)  $\delta$ : 11.58 (br, 1H), 7.88–7.86 (m, 2H), 7.54–7.51 (m, 2H), 7.49 (s, 1H), 7.44–7.42 (m, 1H), 7.14–7.10 (m, 1H), 7.03–6.99 (m, 1H), 6.90 (d,  $J = 1.0$  Hz, 1H); <sup>13</sup>C NMR (100 MHz, DMSO)  $\delta$ : 137.73, 136.85, 132.26, 131.62, 129.33, 129.05, 127.07, 122.33, 120.65, 119.97, 111.83, 99.79.

## 6. References

- [1] S.-D. Yang, C.-L. Sun, Z. Fang, B.-J. Li, Y.-Z. Li and Z.-J. Shi, *Angew. Chem. Int. Ed.* **2008**, *47*, 1473–1476.
- [2] Y. Wei, I. Deb and N. Yoshikai, *J. Am. Chem. Soc.* **2012**, *134*, 9098–9101.
- [3] F. Liu and D. Ma, *J. Org. Chem.* **2007**, *72*, 4844–4850.
- [4] A. Carpita, A. Ribecai, P. Stabile, *Tetrahedron* **2010**, *66*, 7169–7178.
- [5] M. Shen, B. E. Leslie and T. G. Driver, *Angew. Chem. Int. Ed.* **2008**, *47*, 5056–5059.
- [6] T. Pei, C.-Y. Chen, P.G. Dormer and I. W. Davies, *Angew. Chem. Int. Ed.* **2008**, *47*, 4231–4233.
- [7] S. Cacchi, G. Fabrizi, A. Goggiamani, A. Perboni, A. Sferrazza and P. Stabile, *Org. Lett.* **2010**, *12*, 3279–3281.
- [8] N. Sakai, K. Annaka, A. Fujita, A. Sato and T. Konakahara, *J. Org. Chem.* **2008**, *73*, 4160–4165.
- [9] A. Prakash, M. Dibakar, K. Selvakumar, K. Ruckmani and M. Sivakumar, *Tetrahedron Lett.* **2011**, *52*, 5625–5628.

## 5. $^1\text{H}$ NMR and $^{13}\text{C}$ NMR spectra of the products

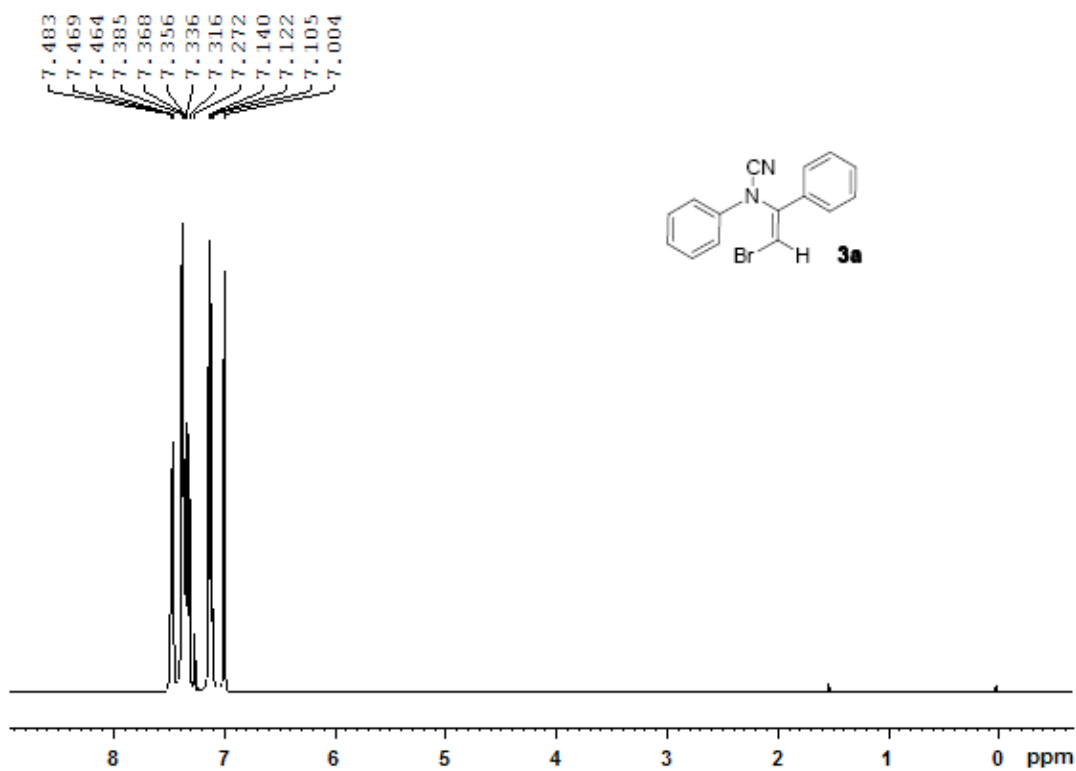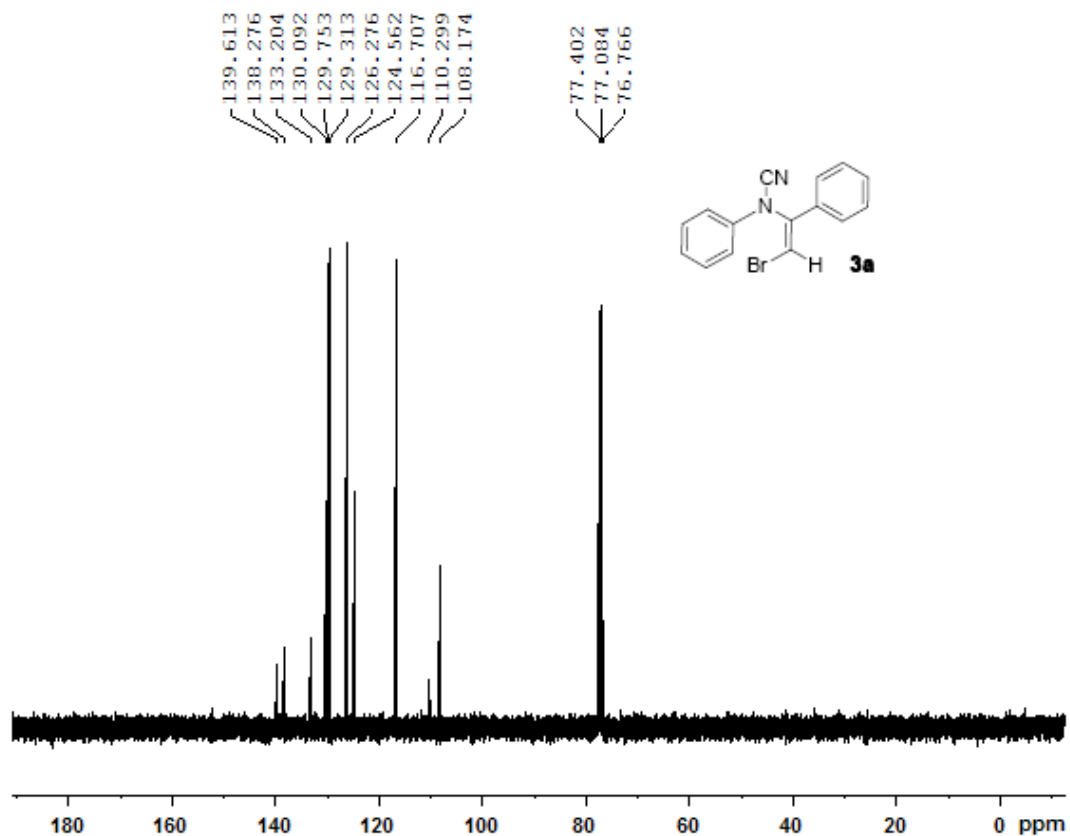

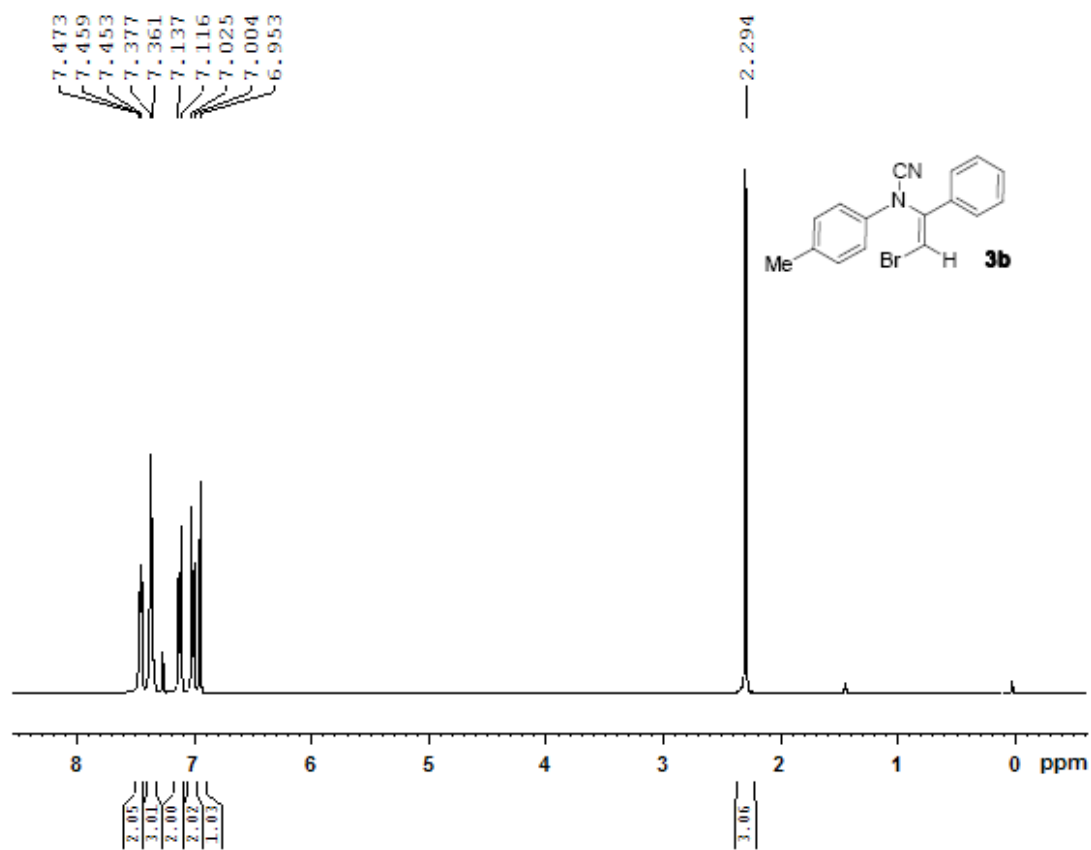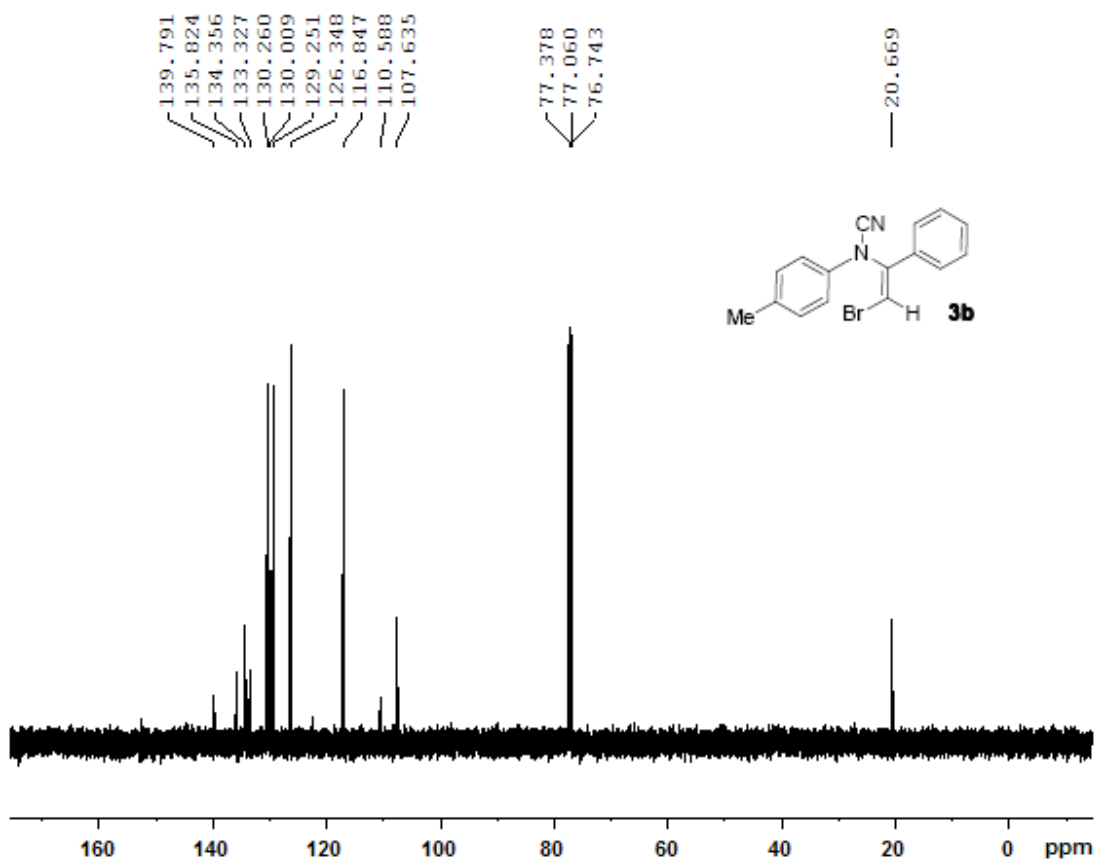

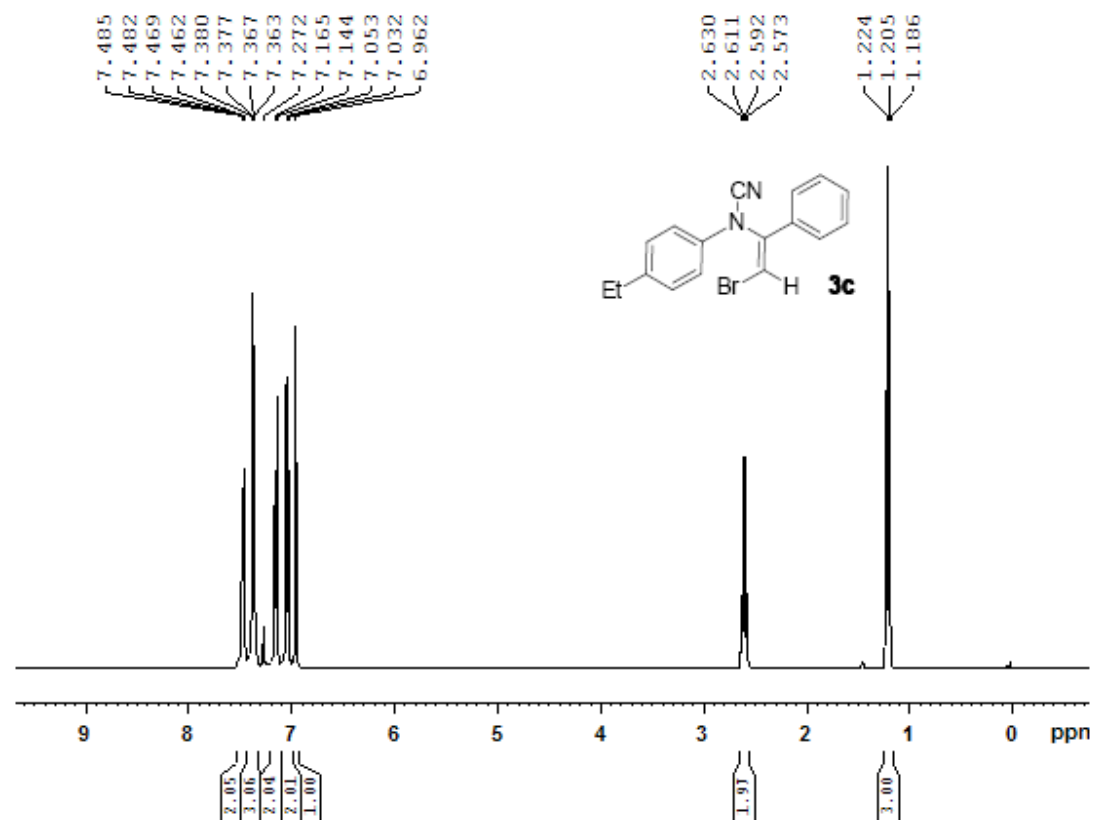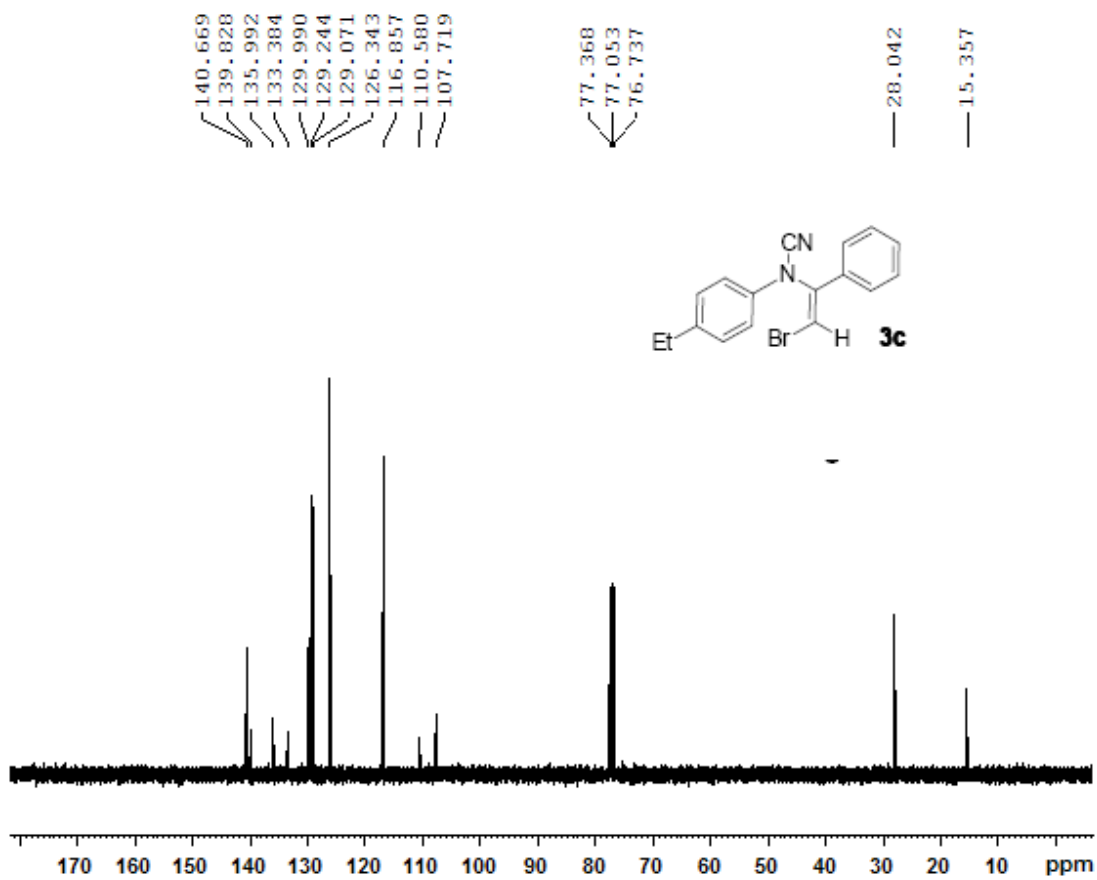

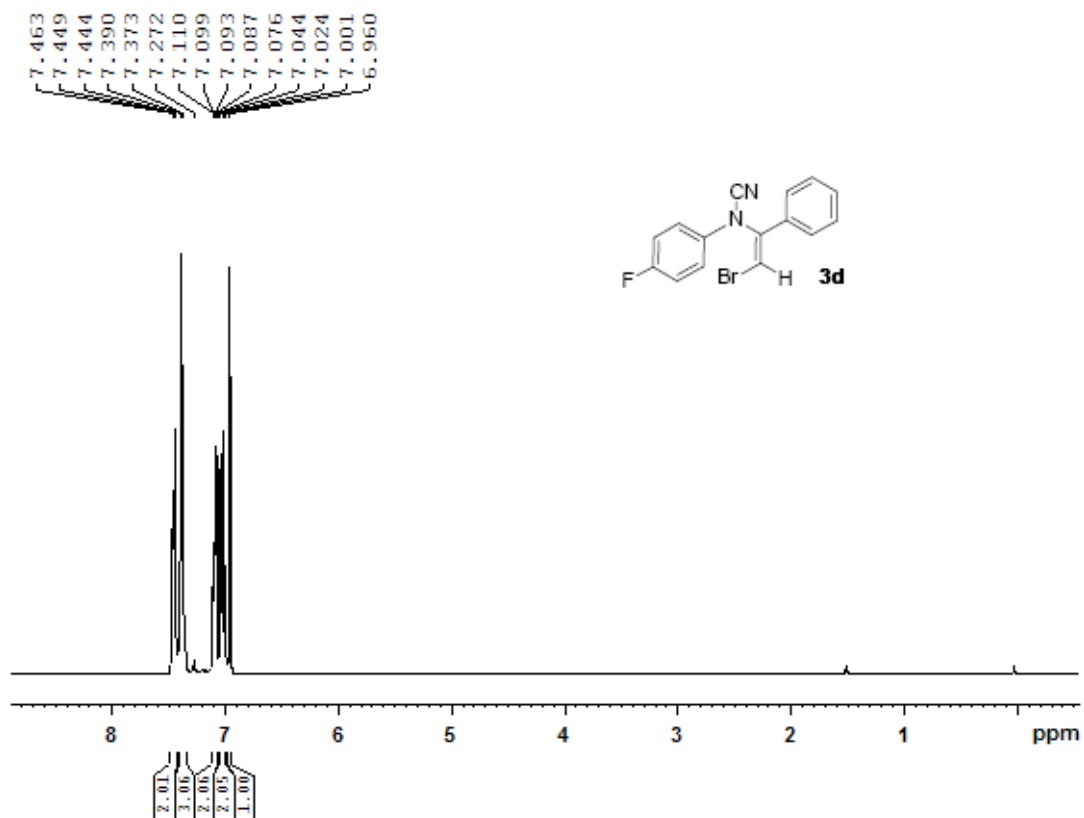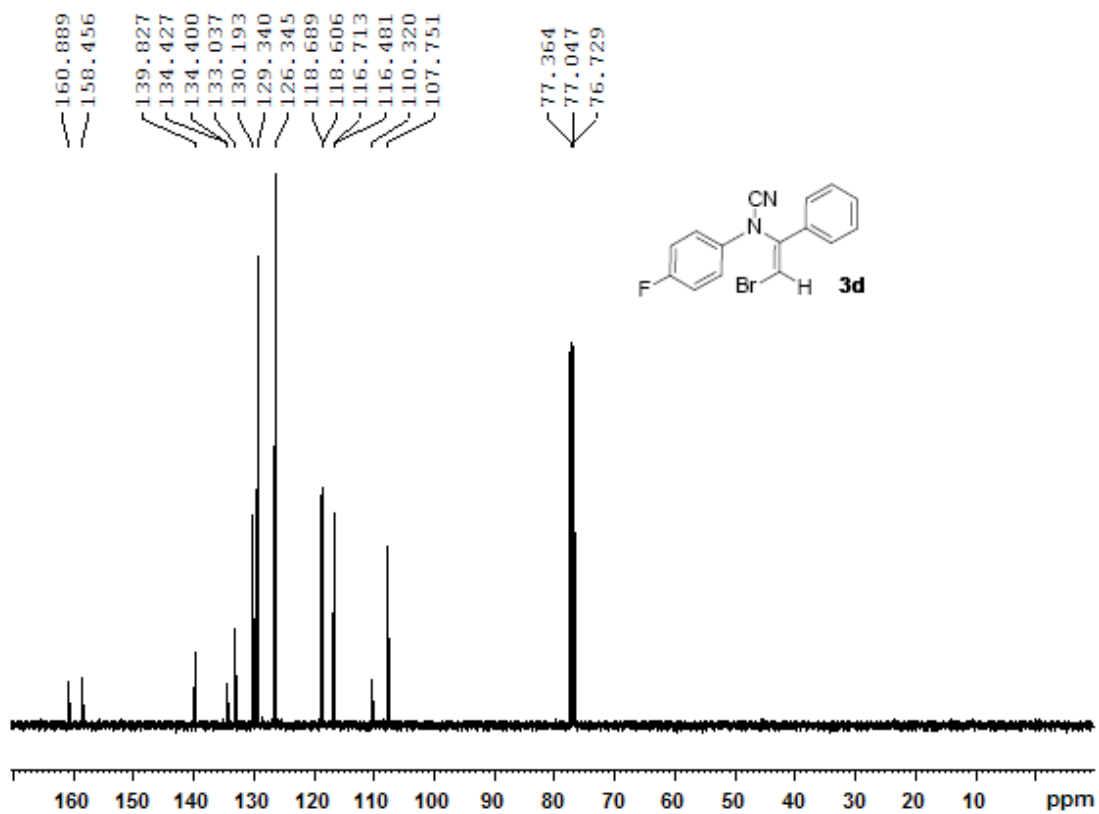

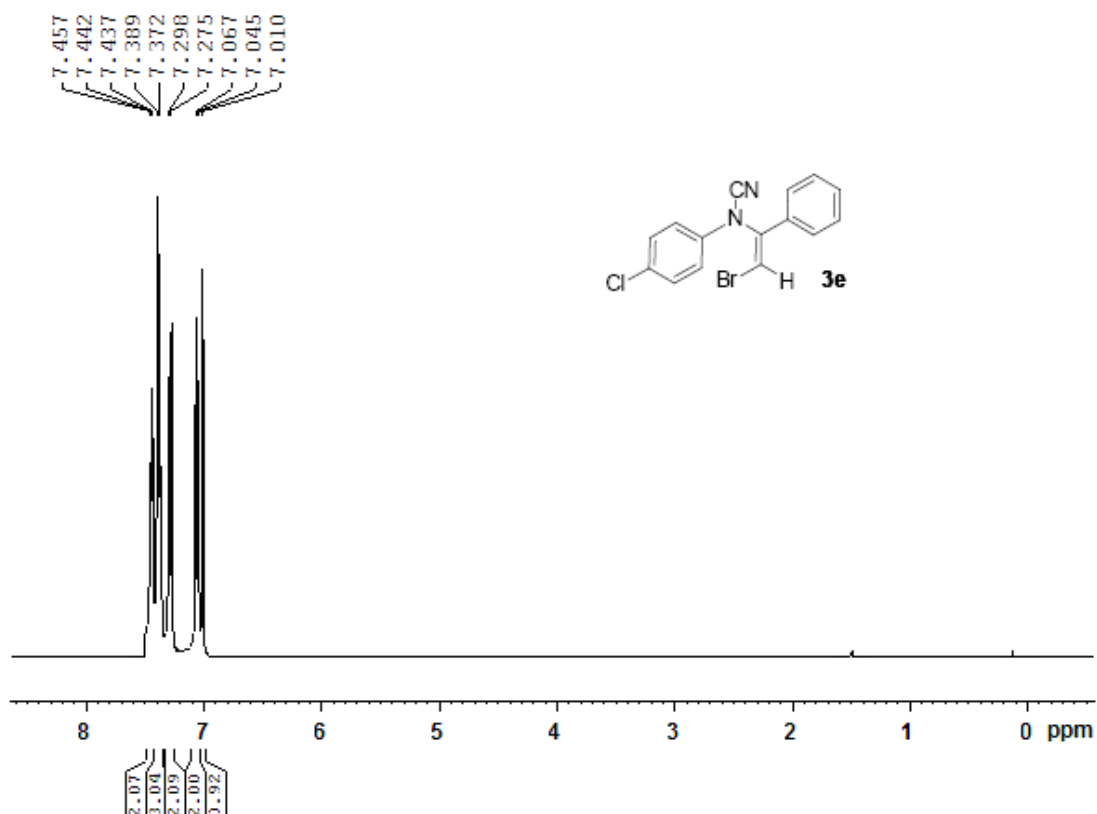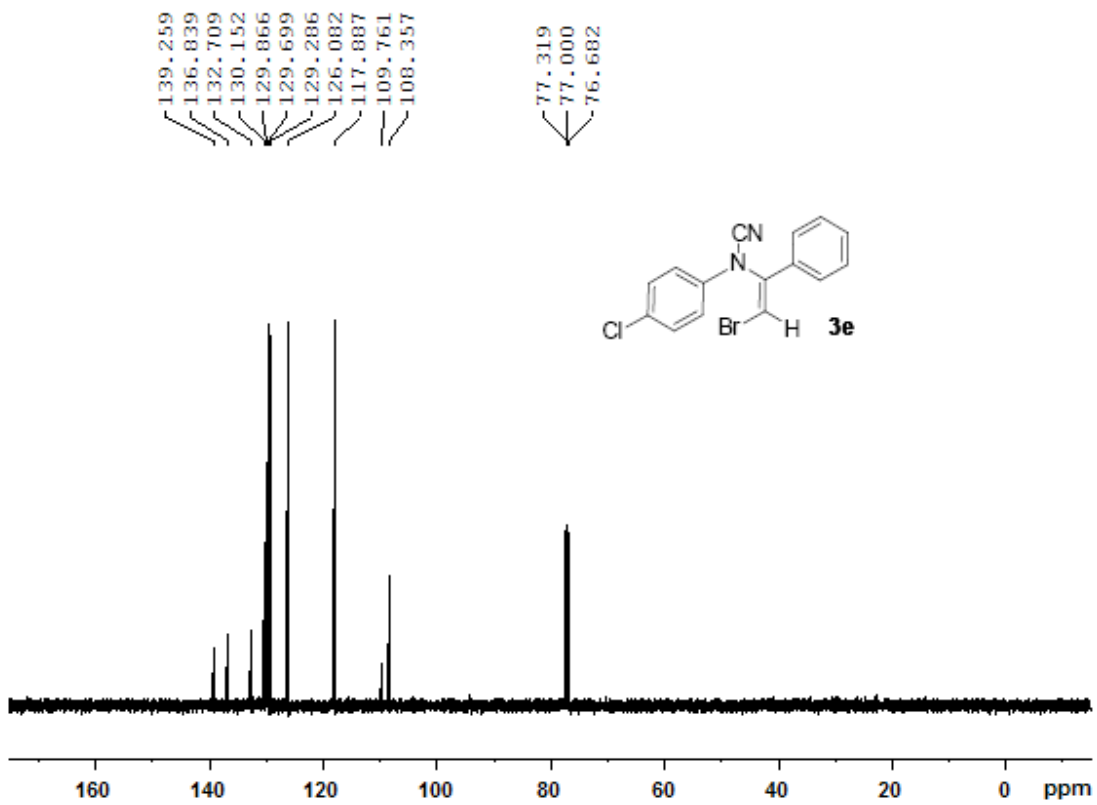

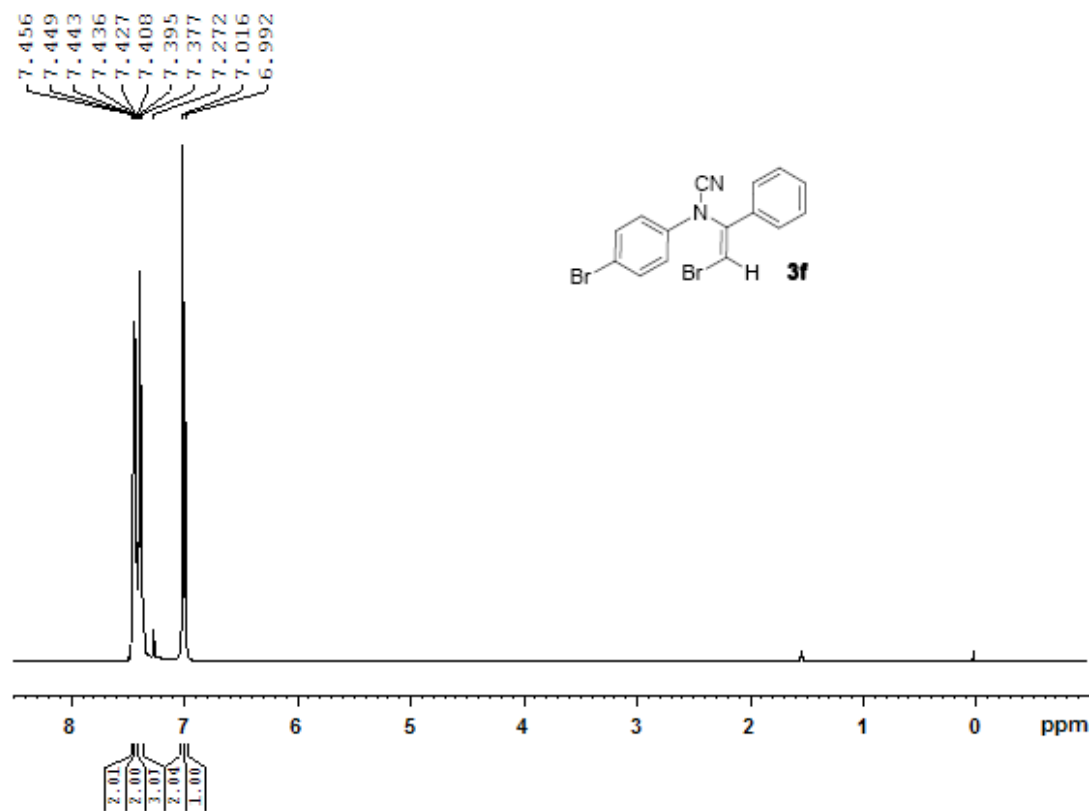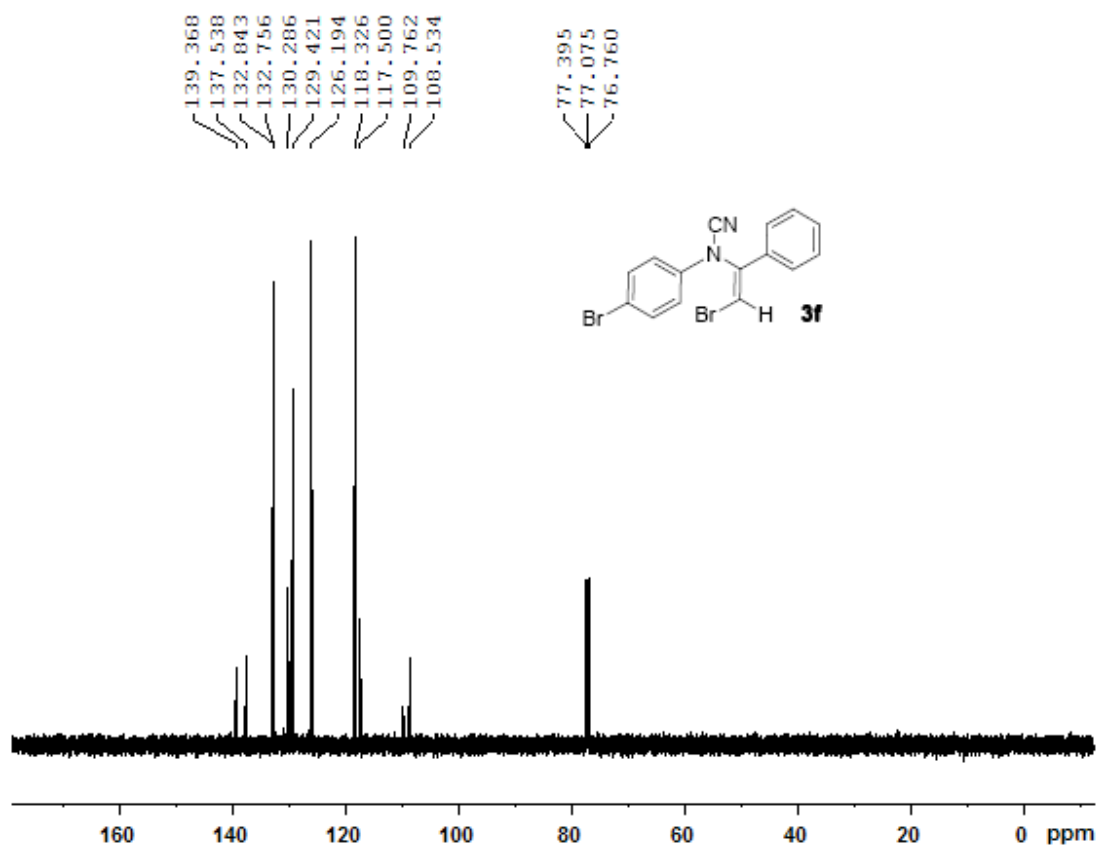

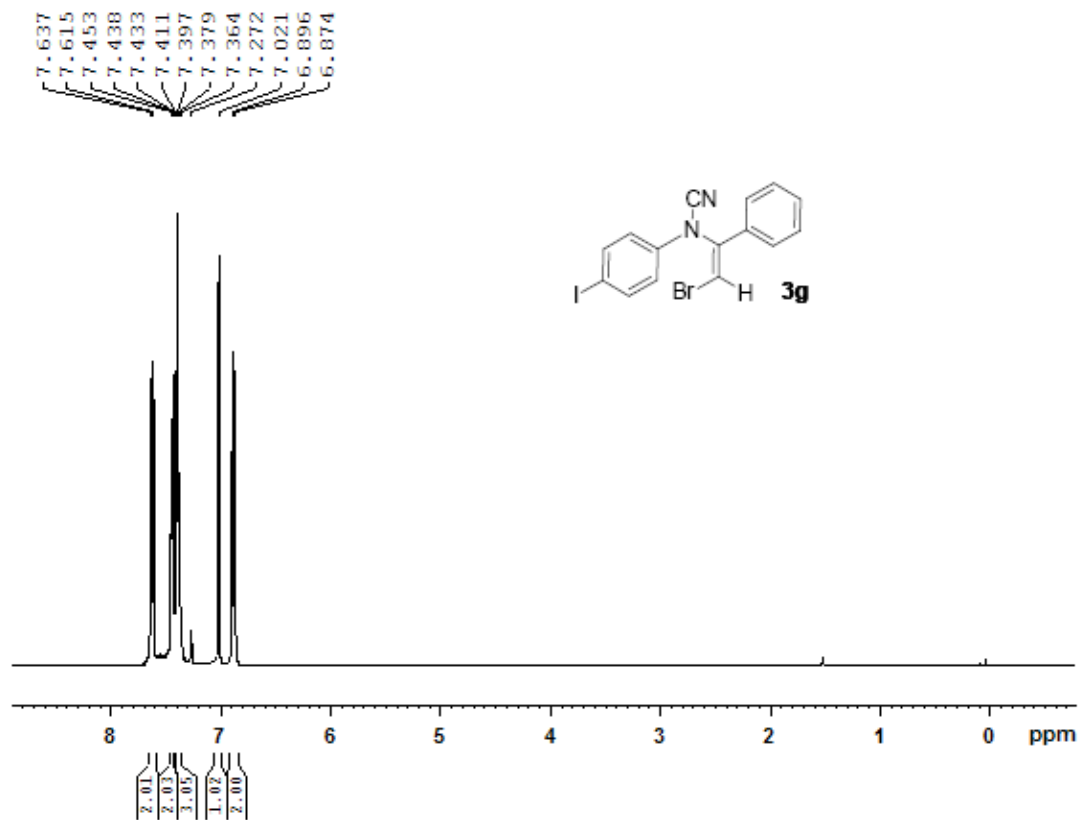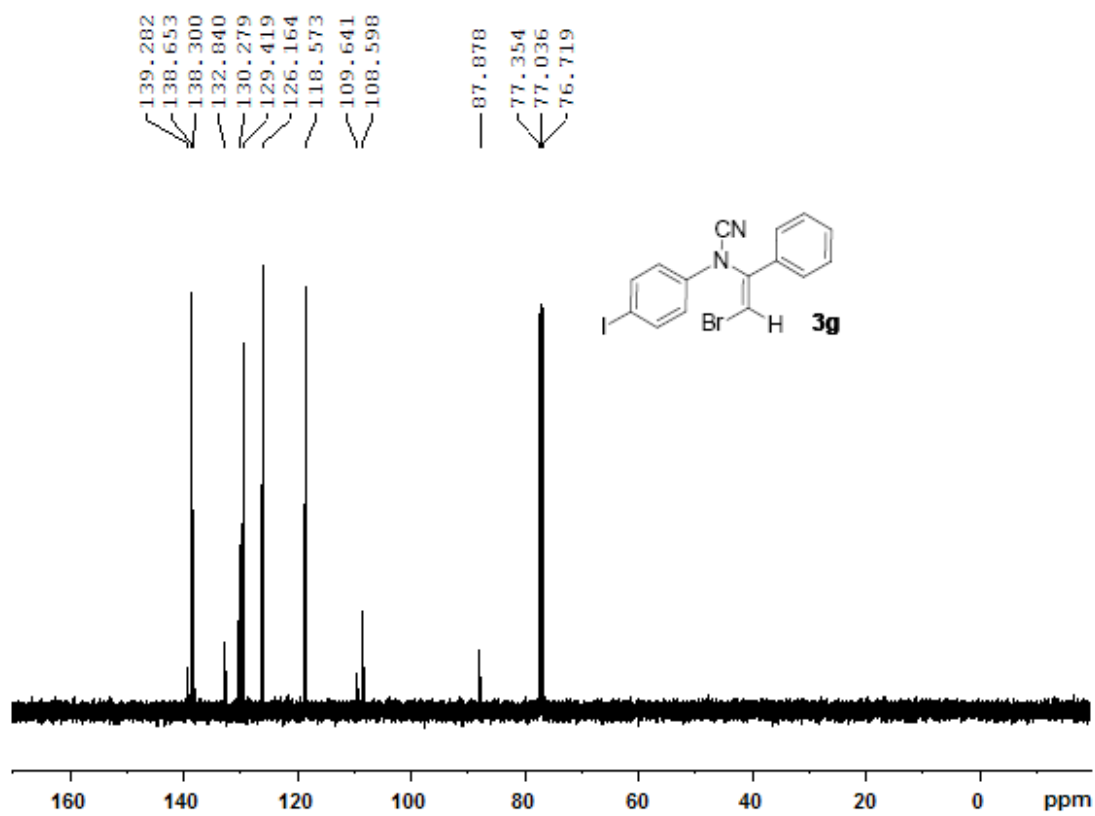



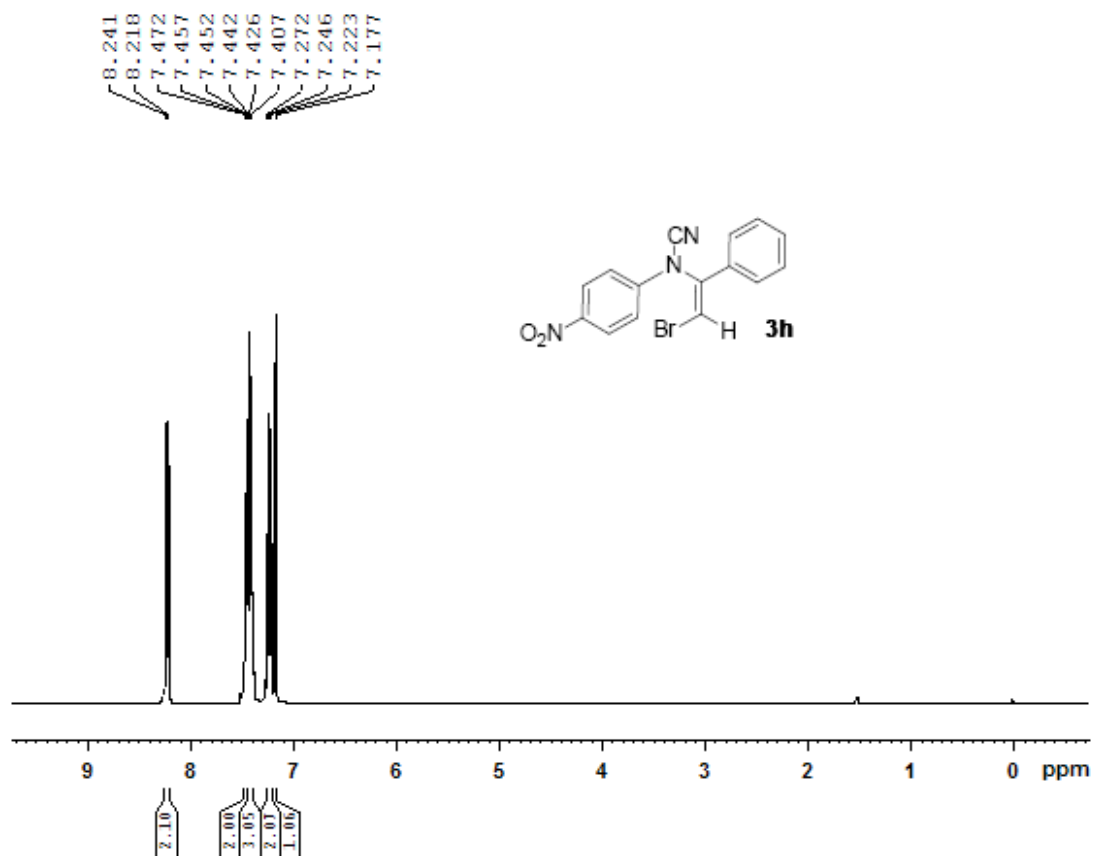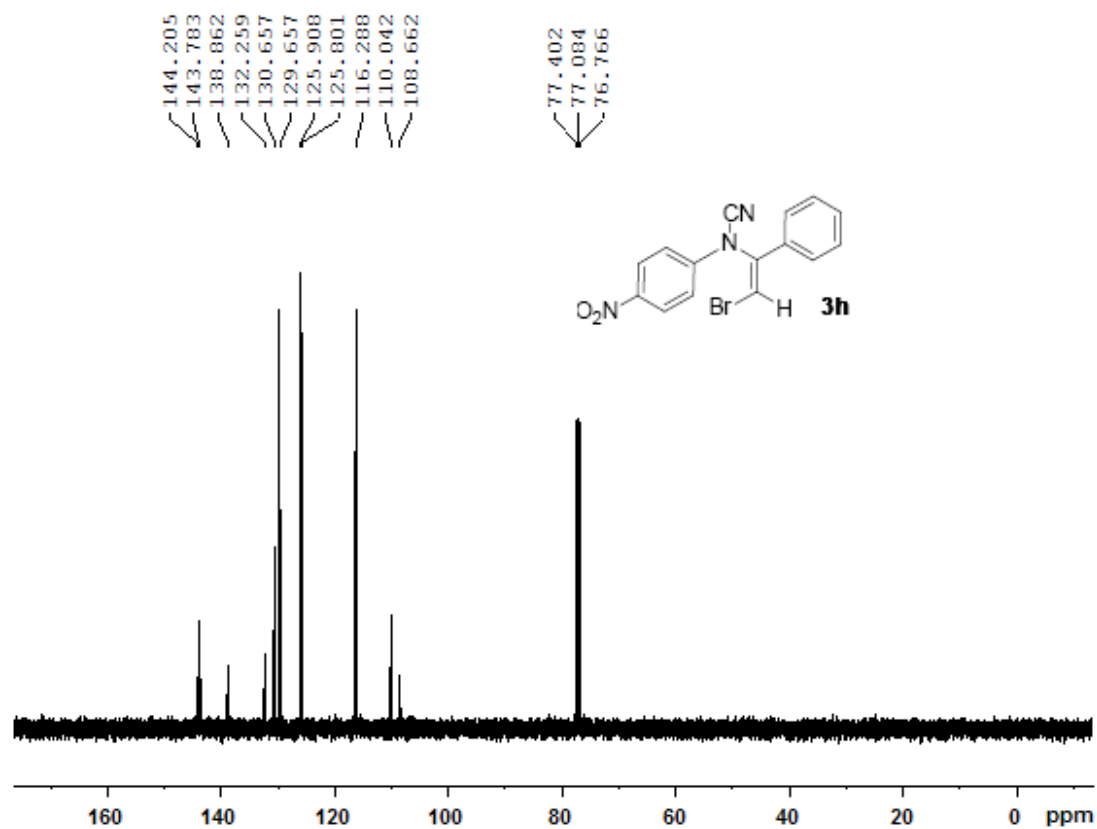

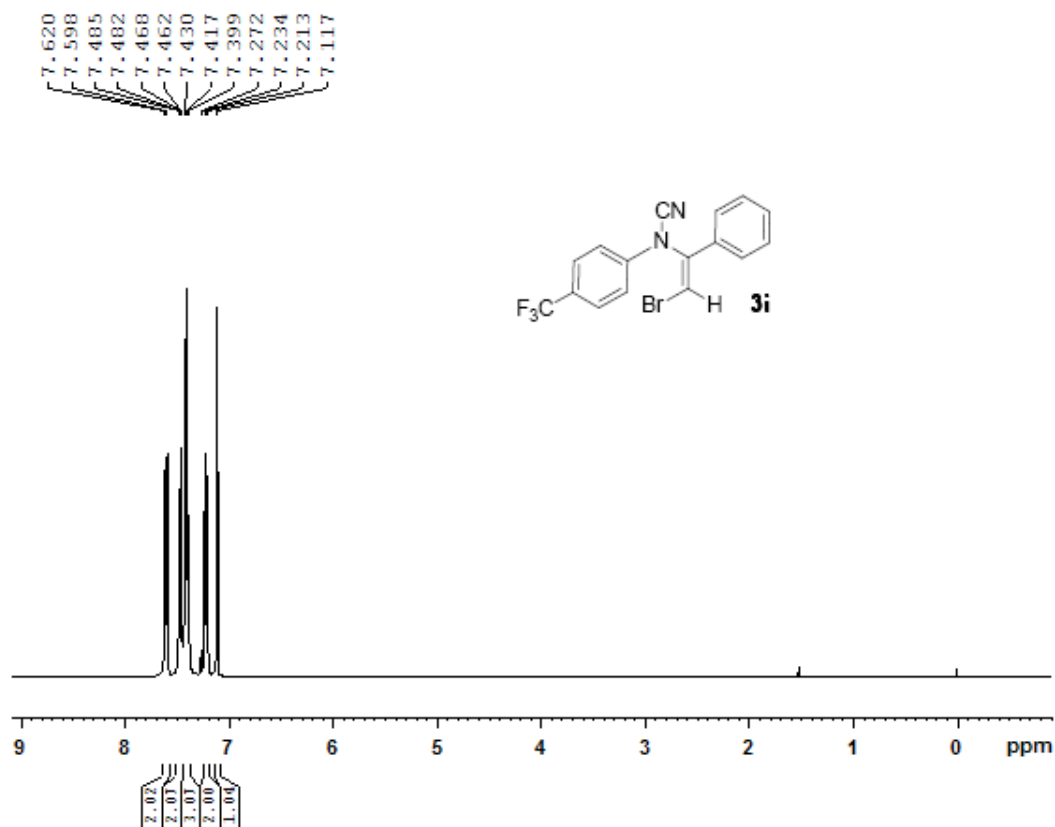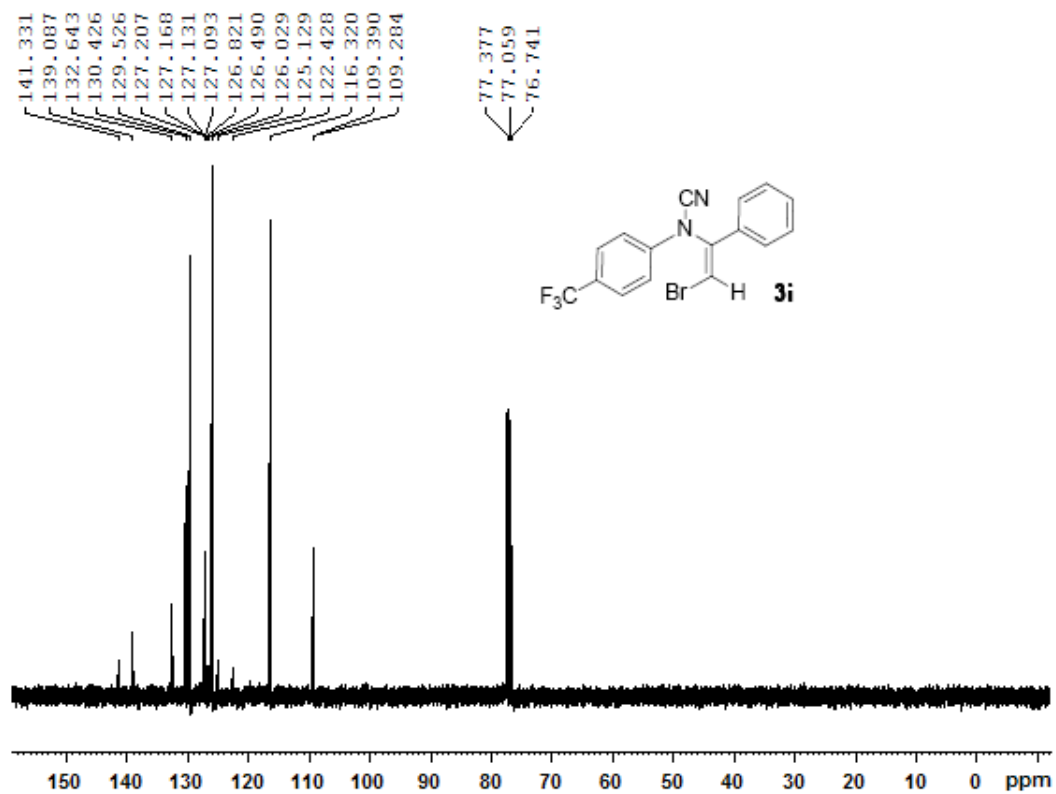

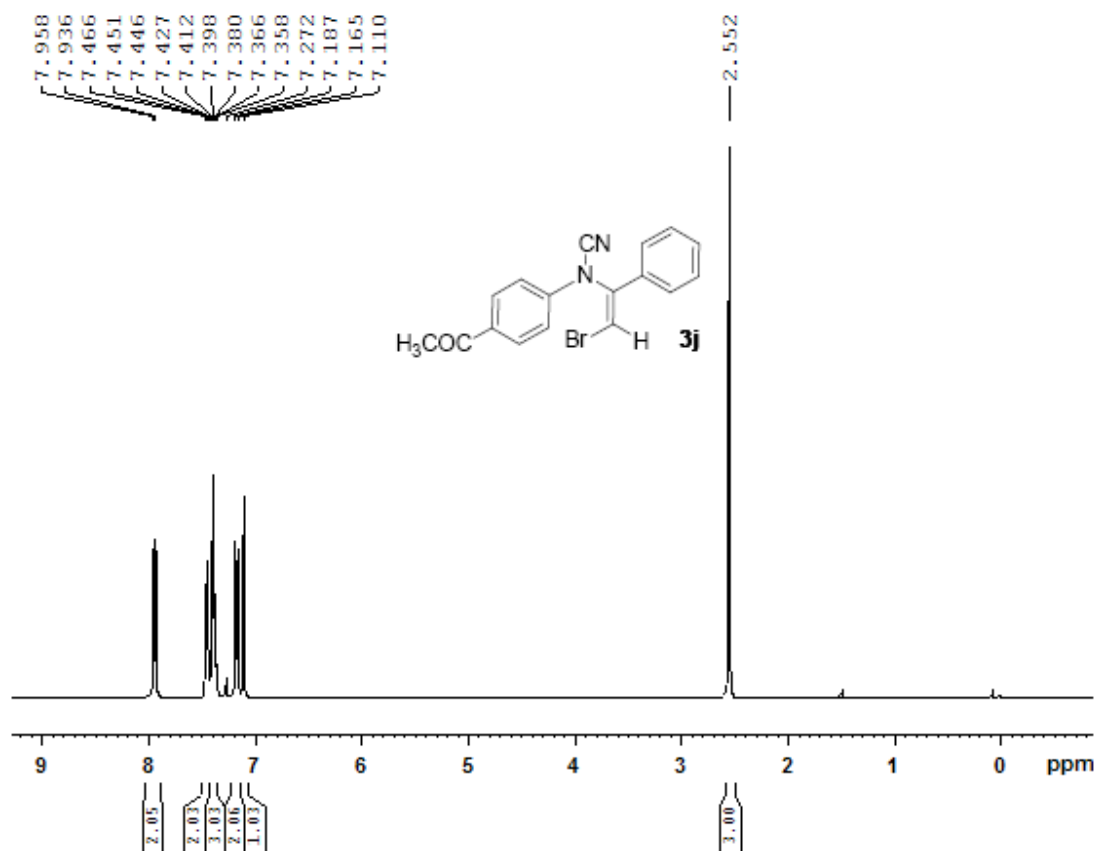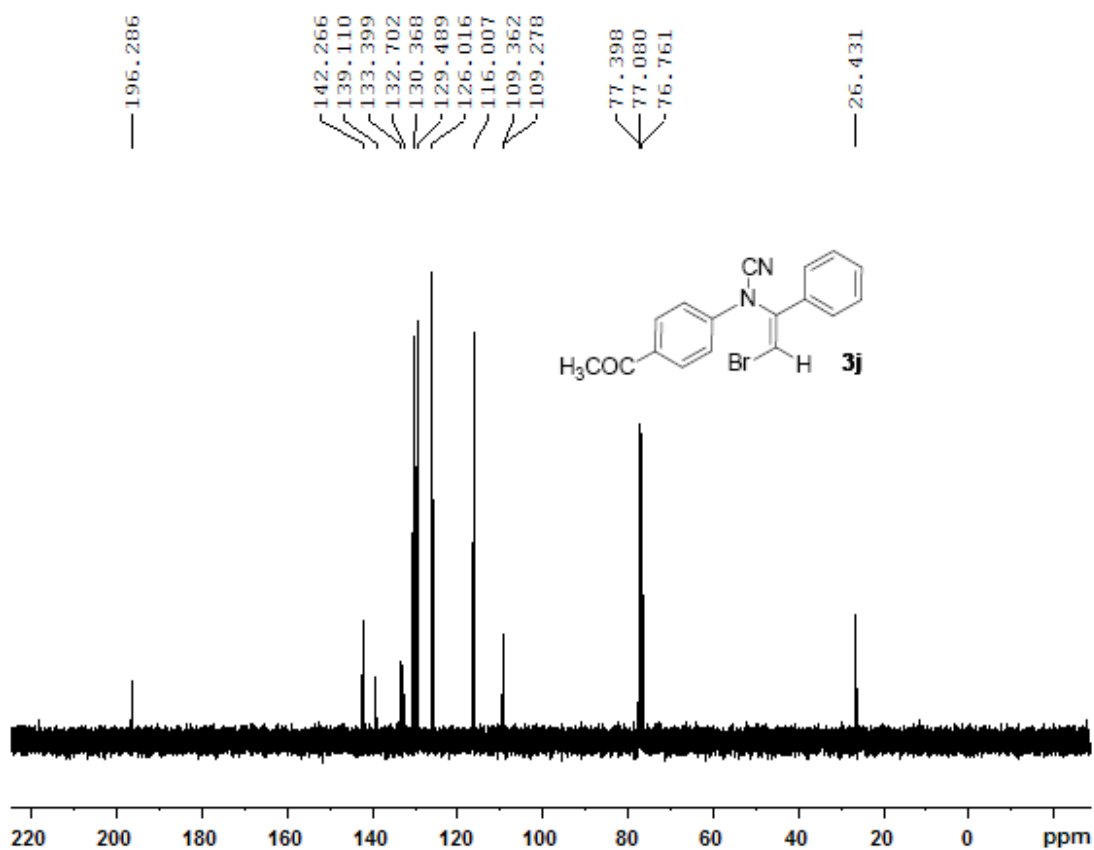

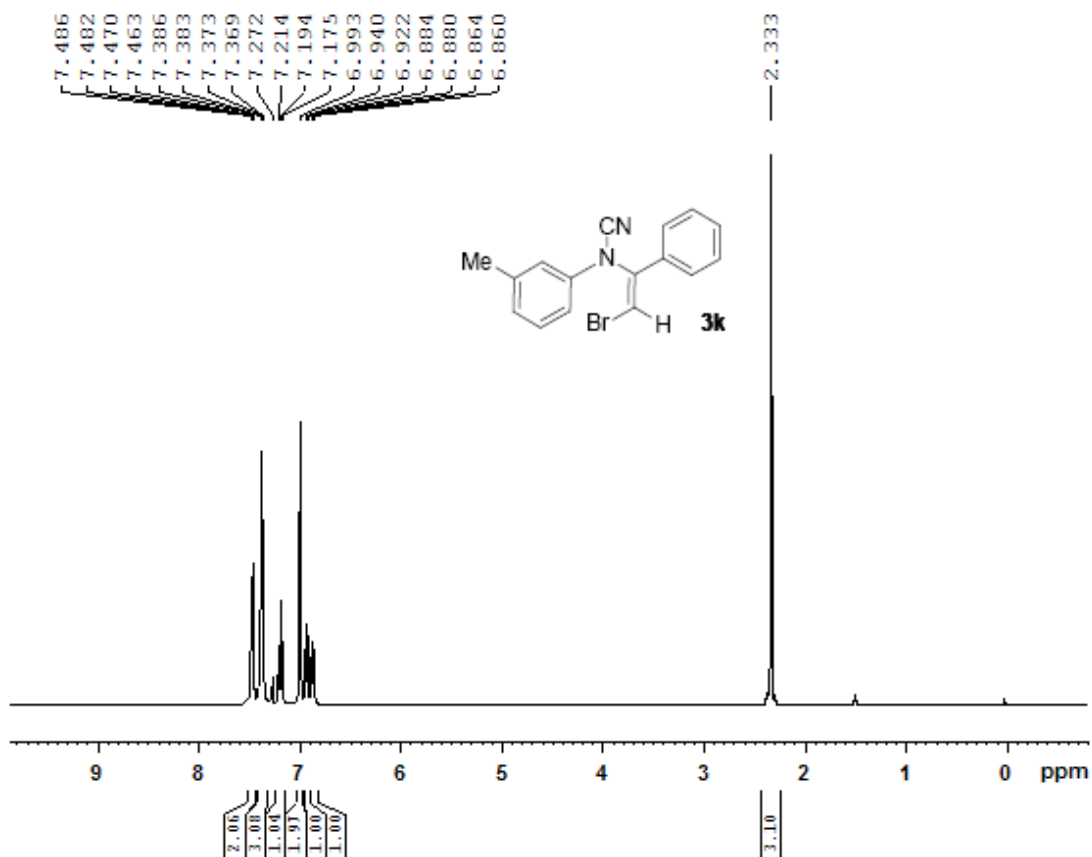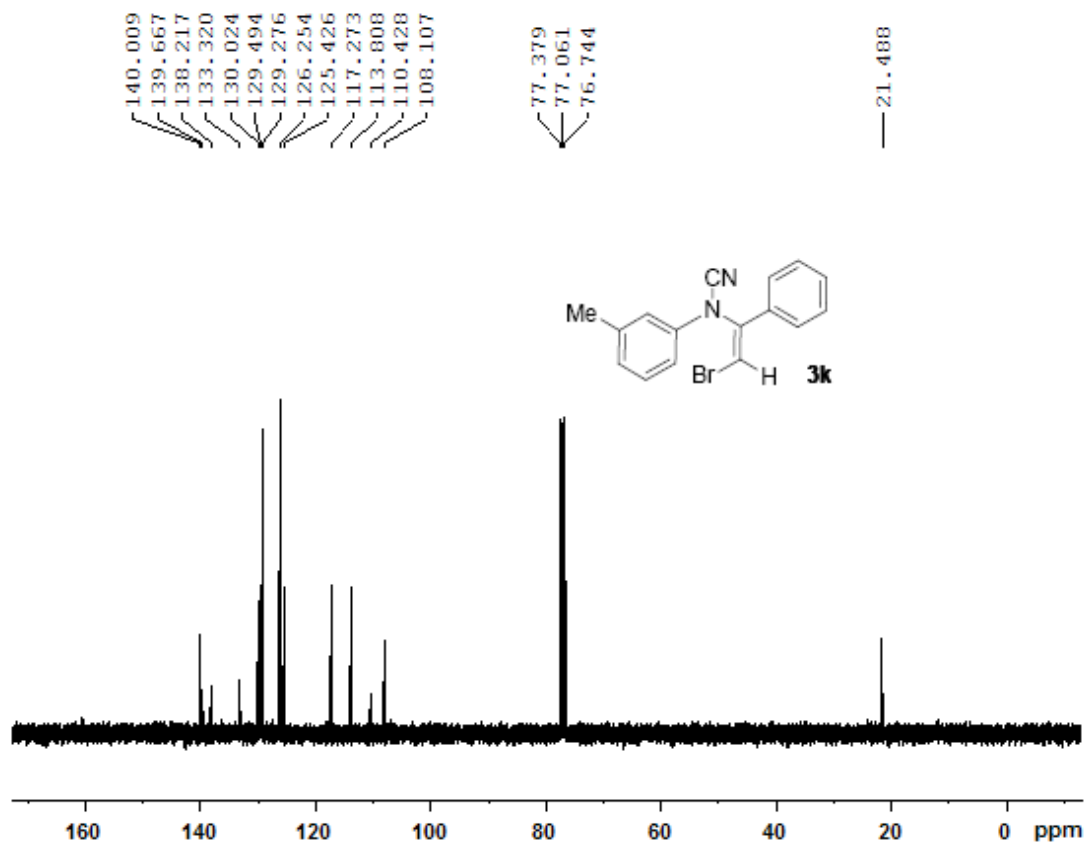

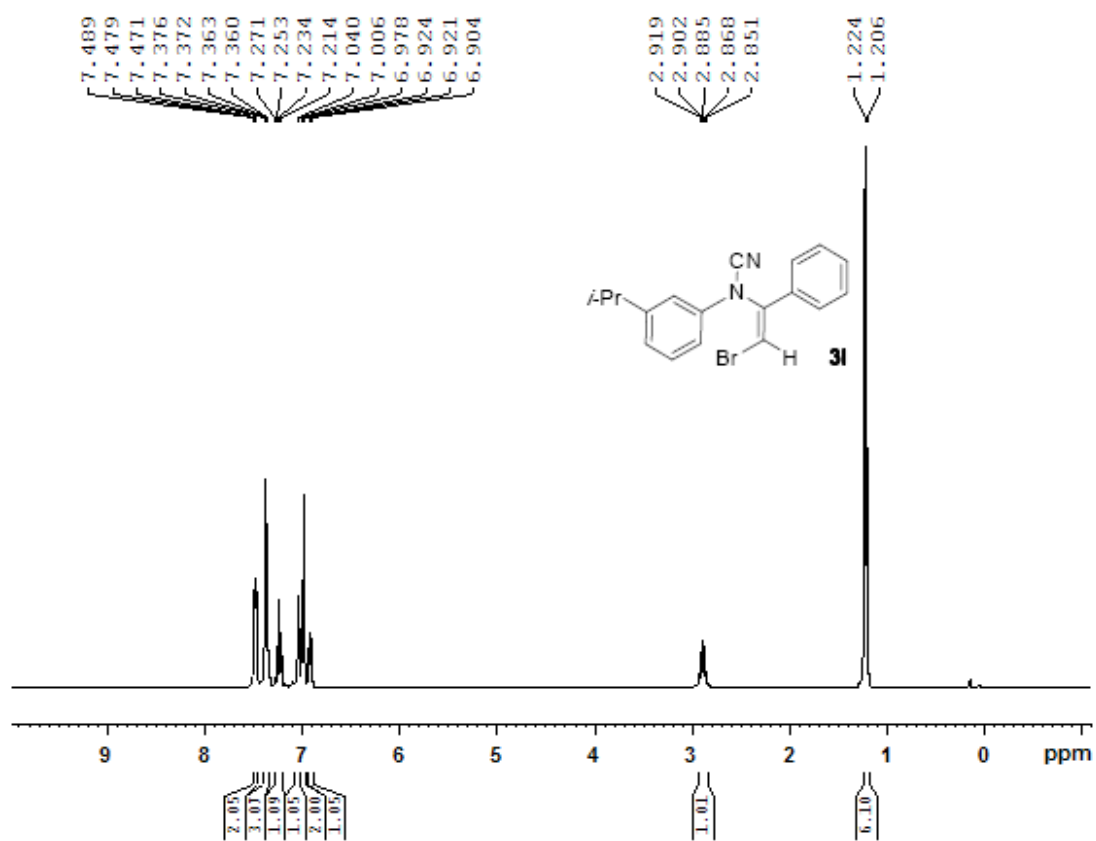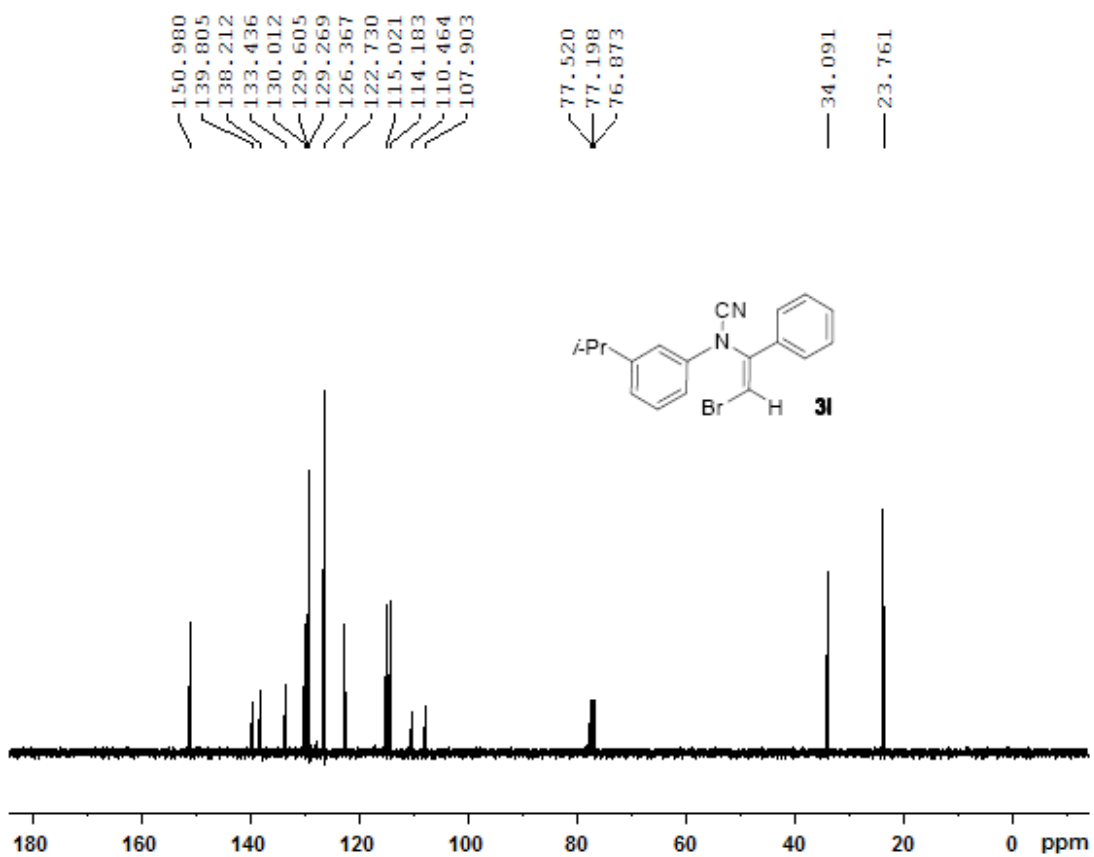

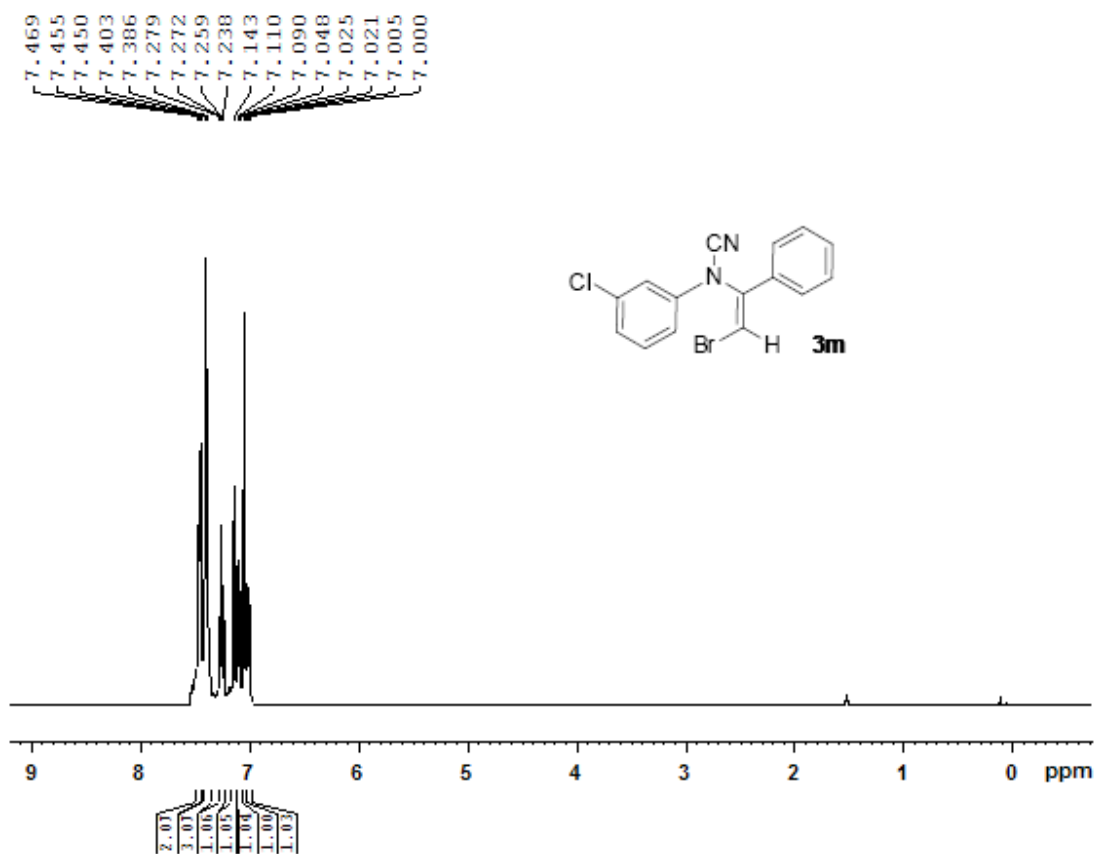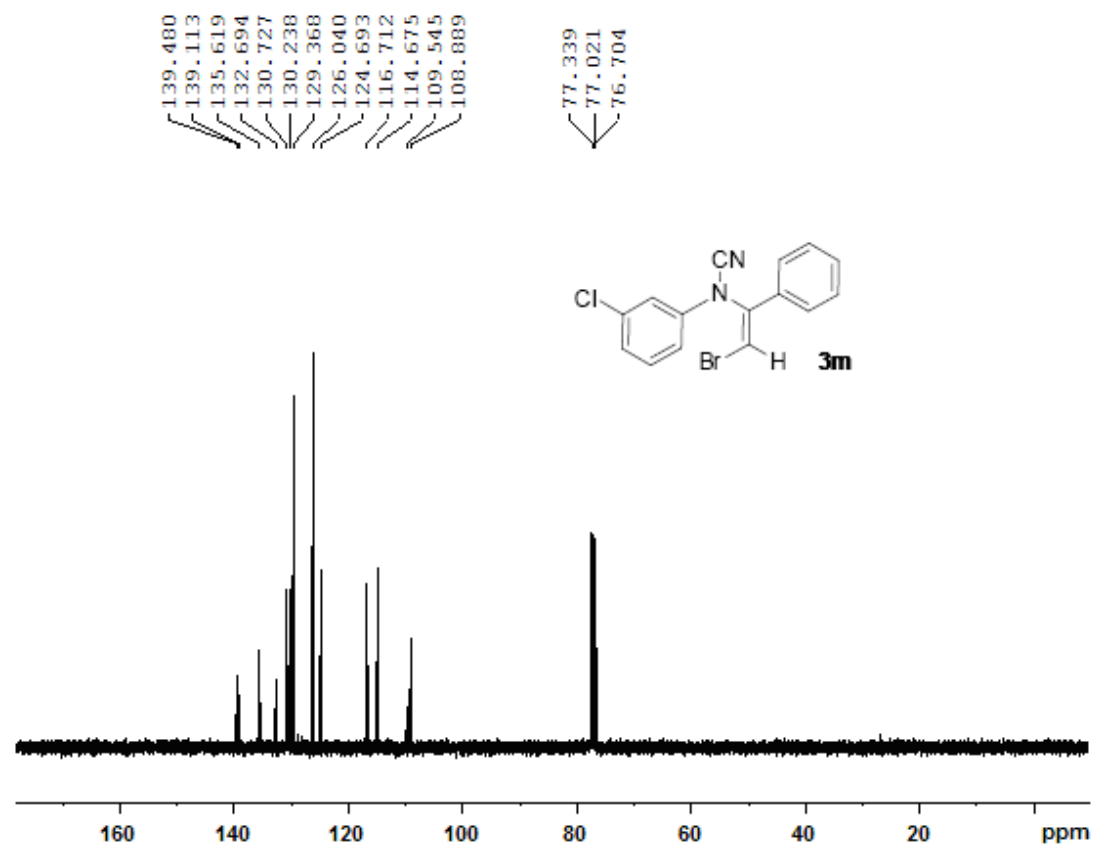

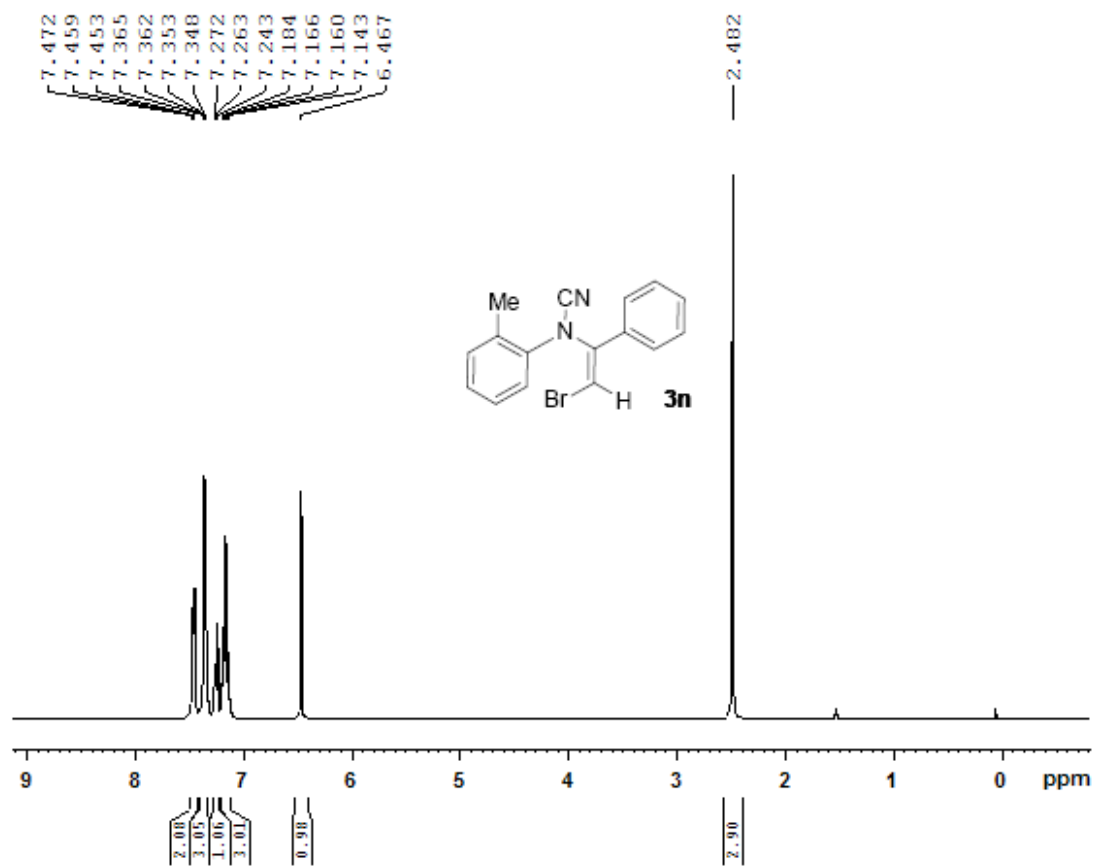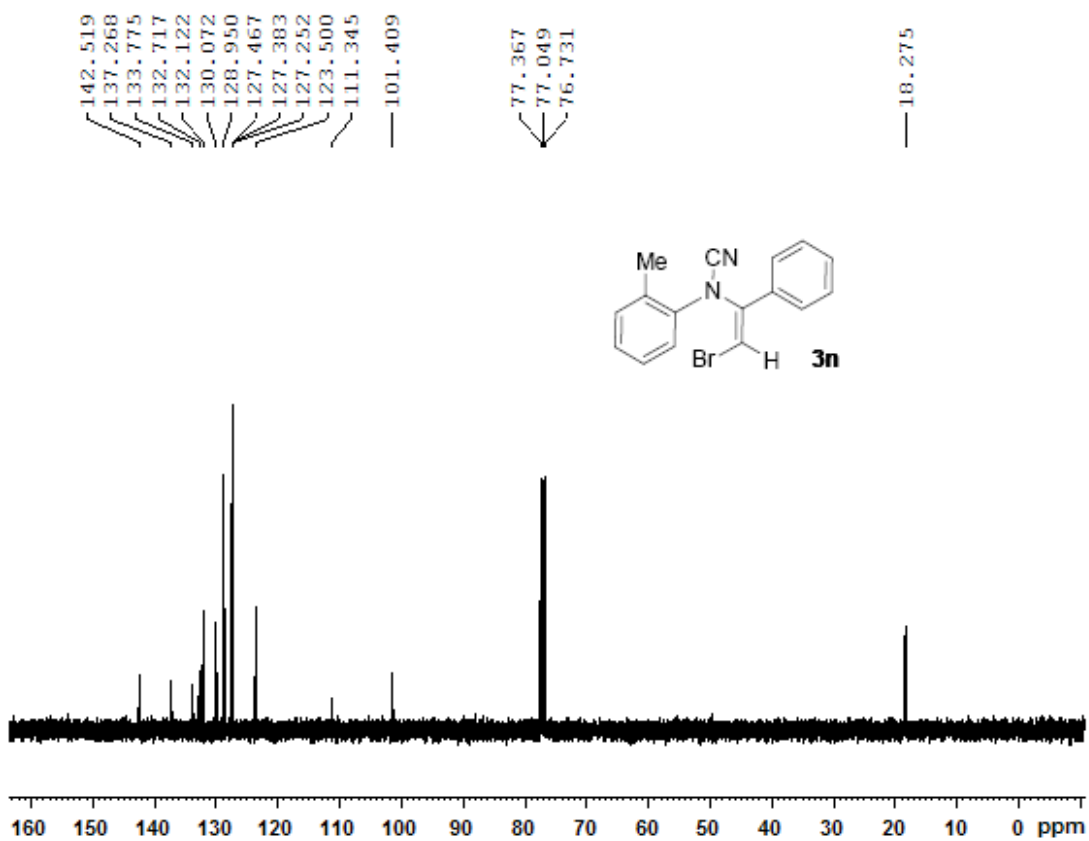

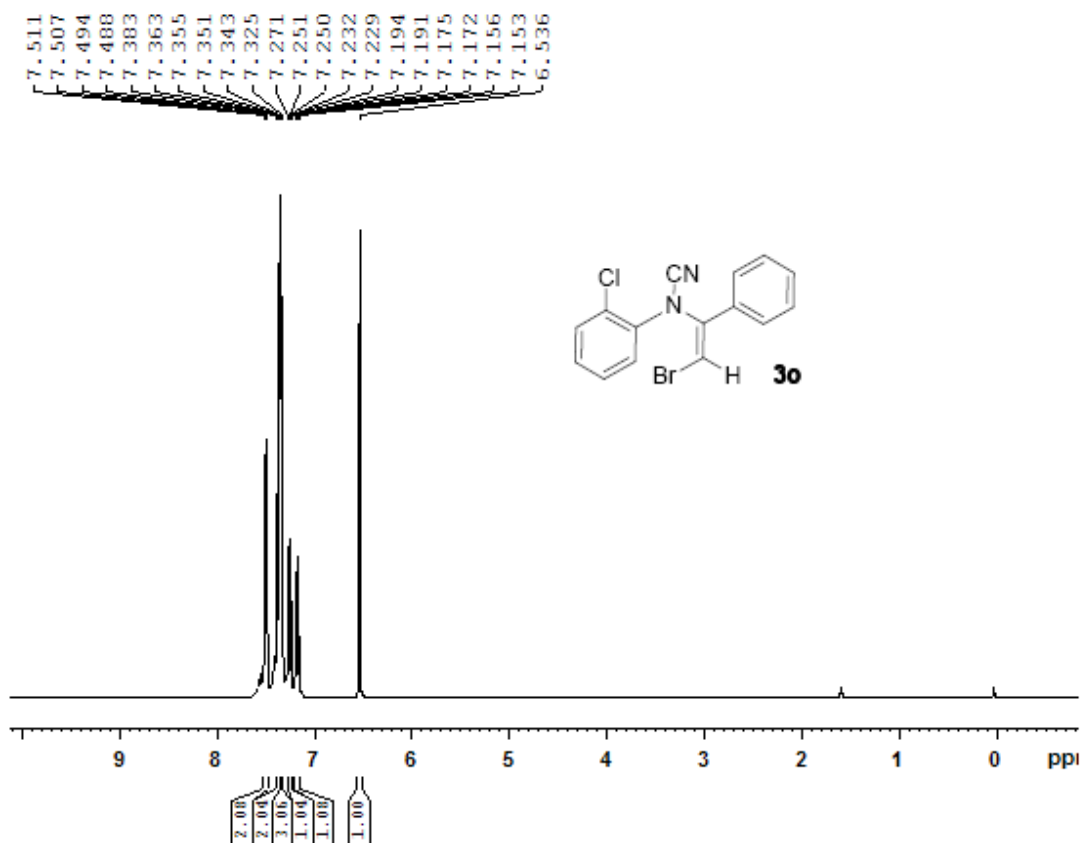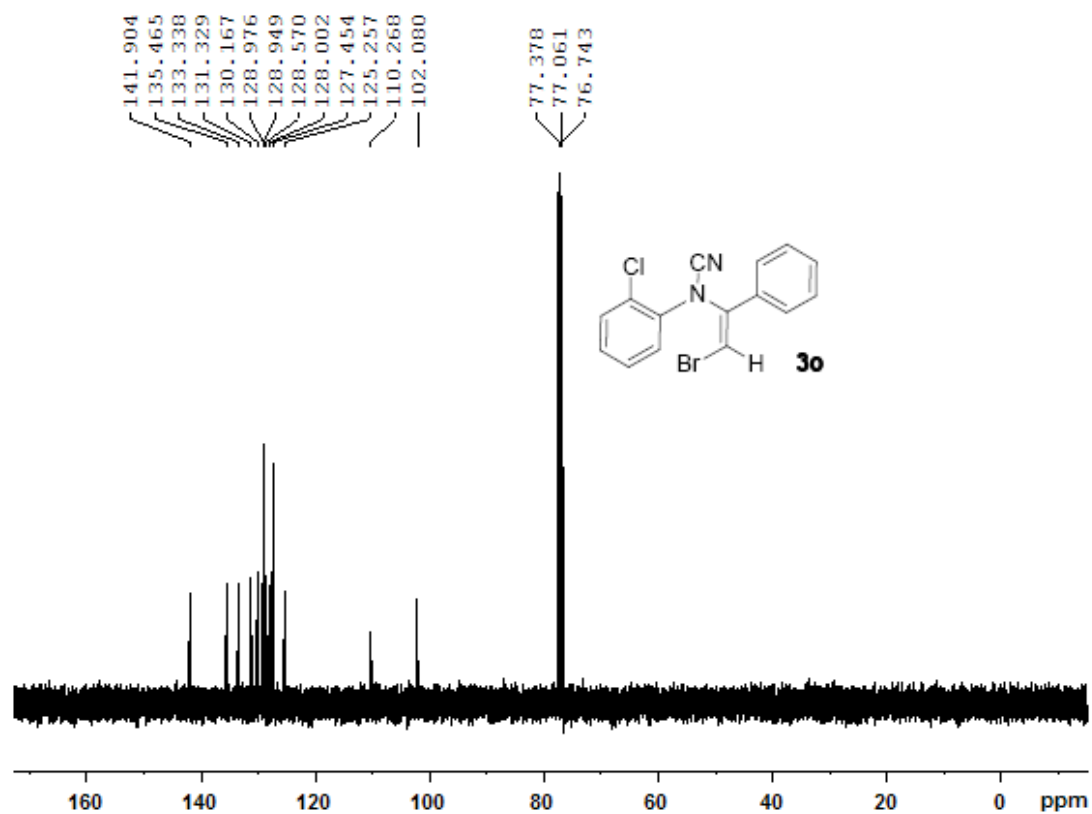



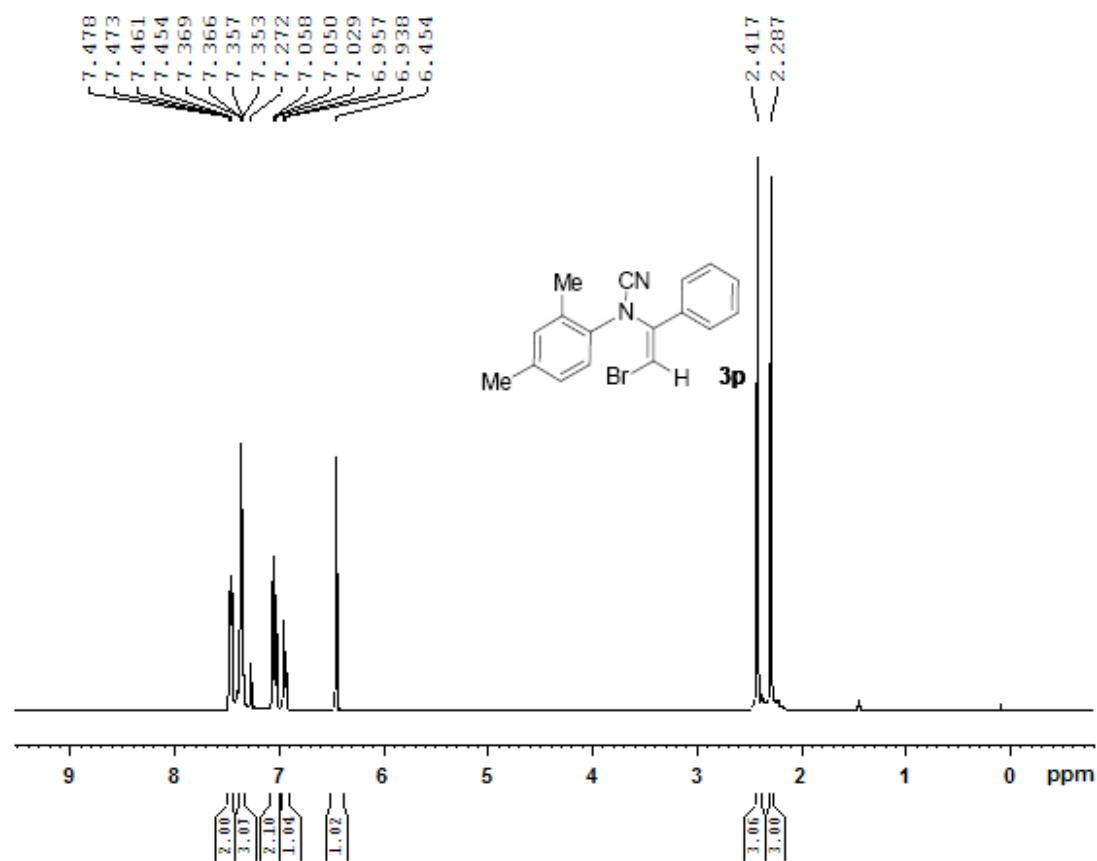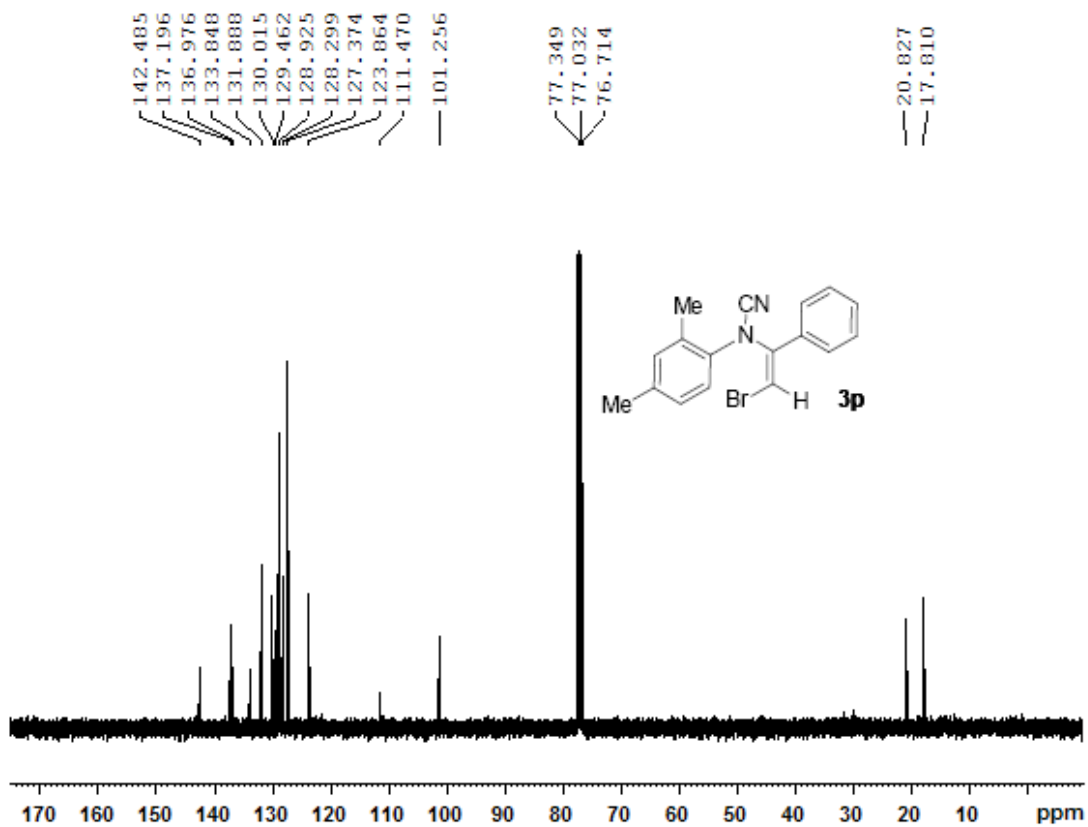

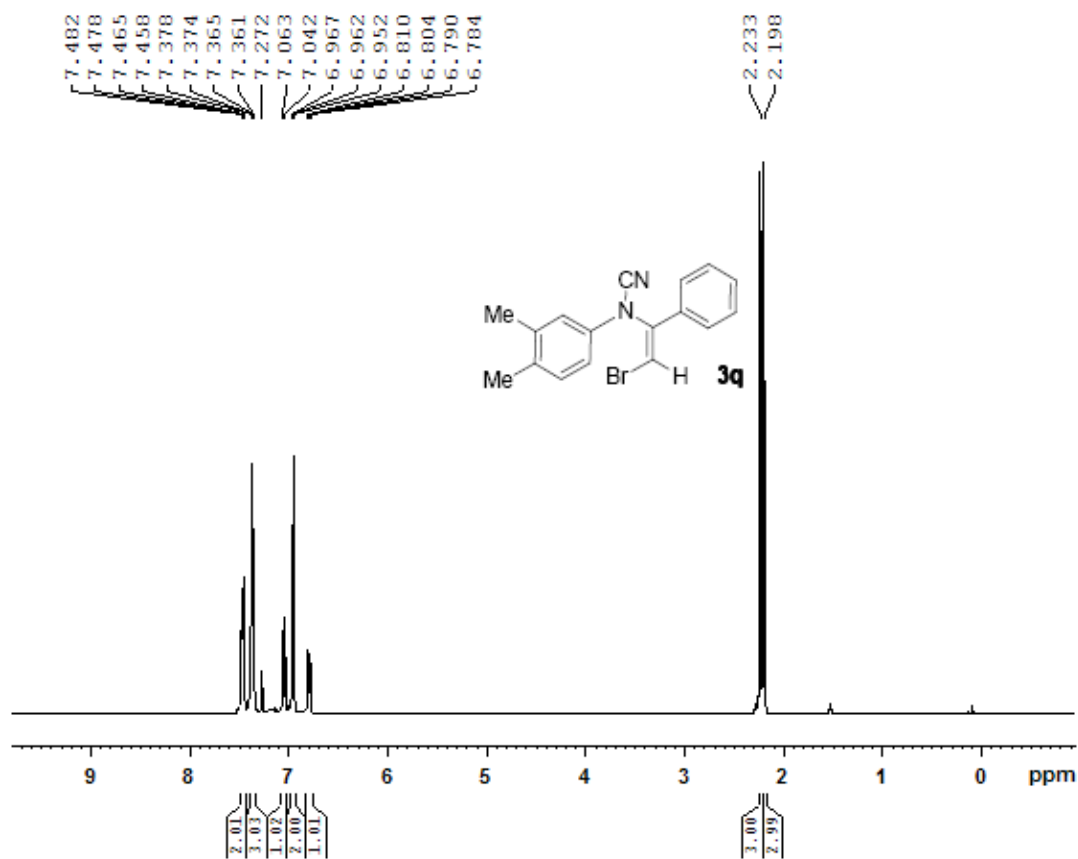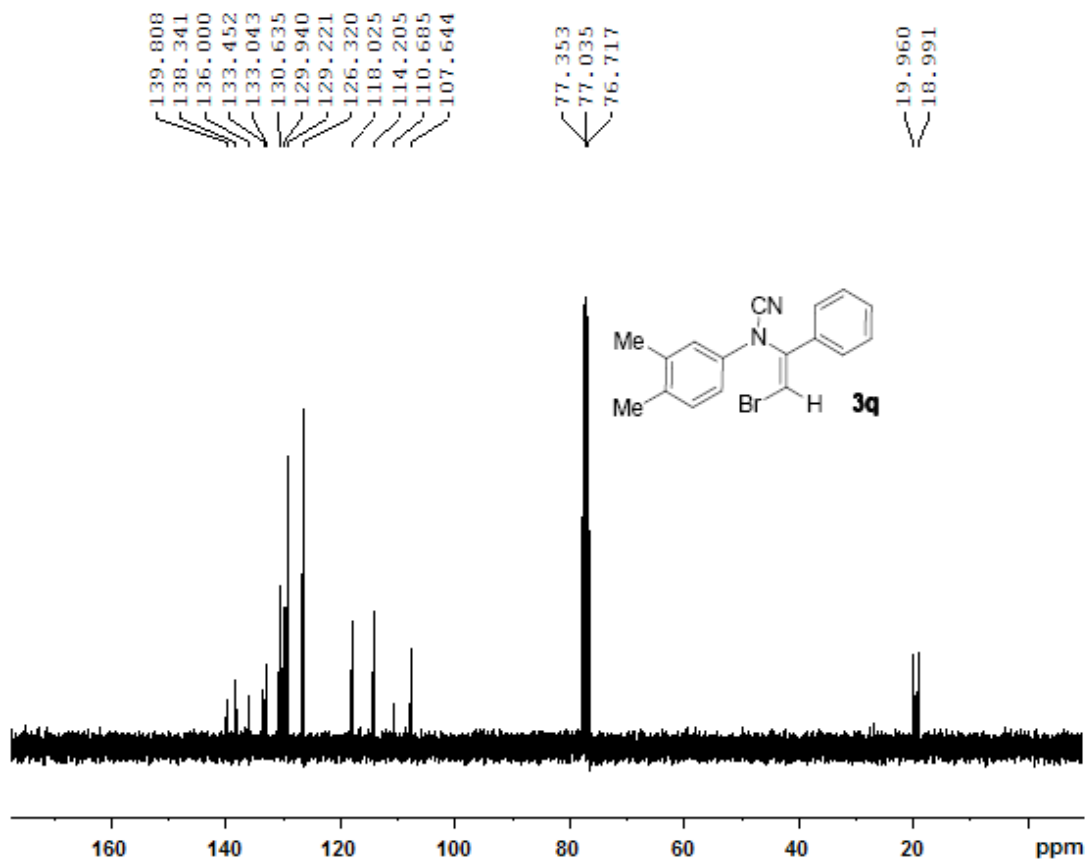



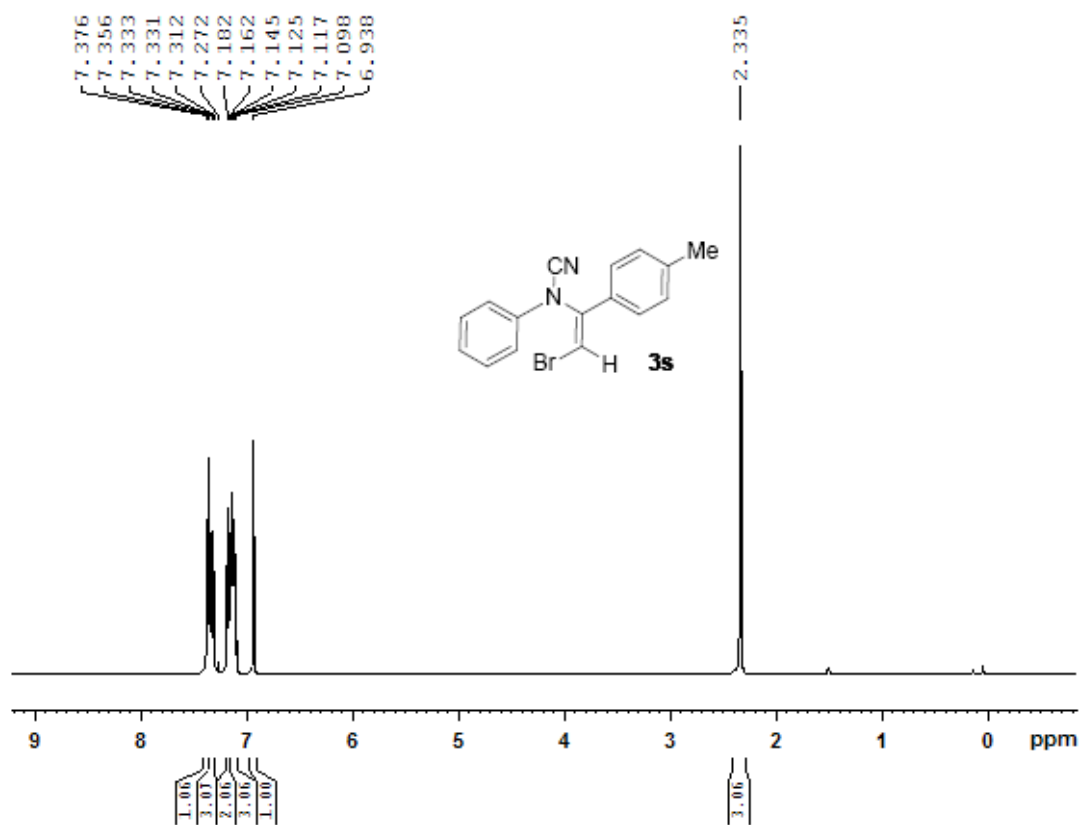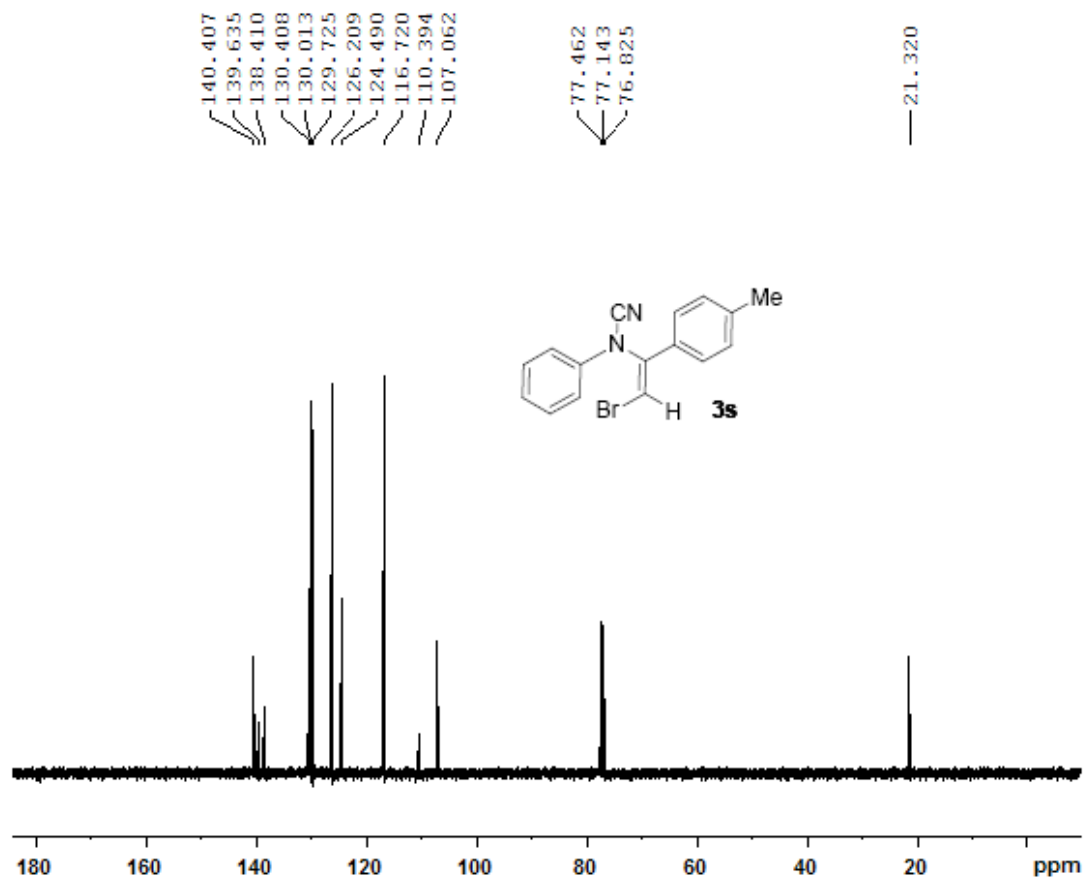

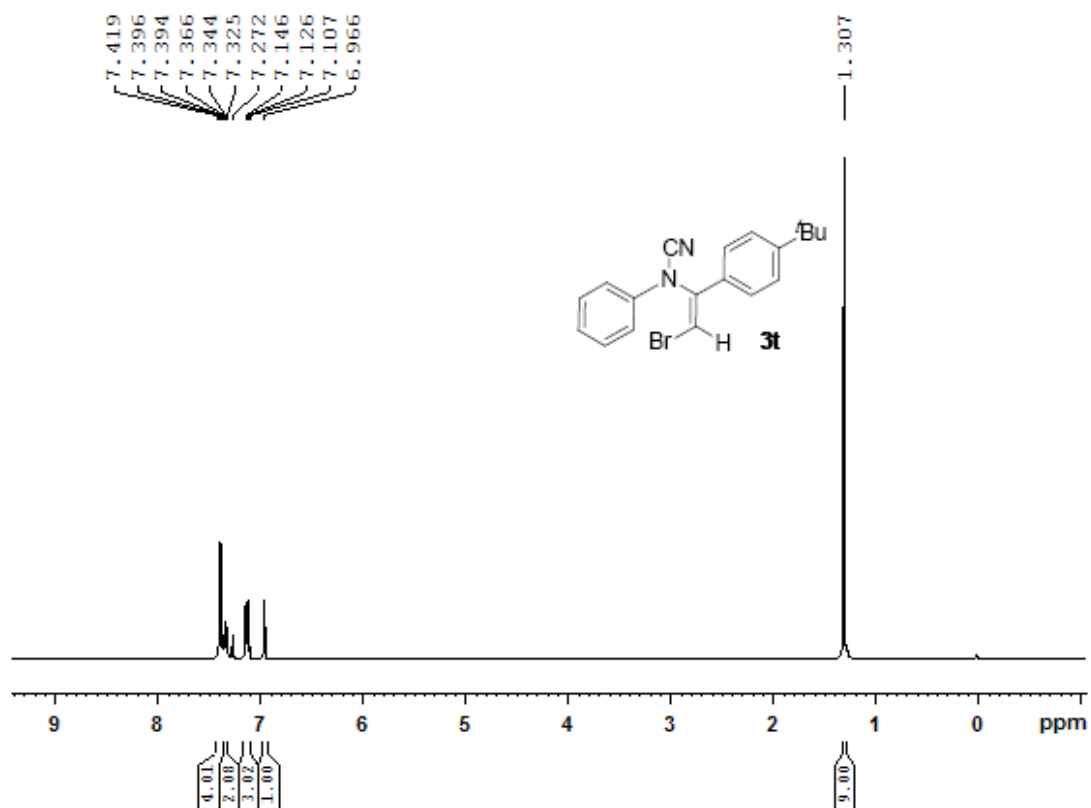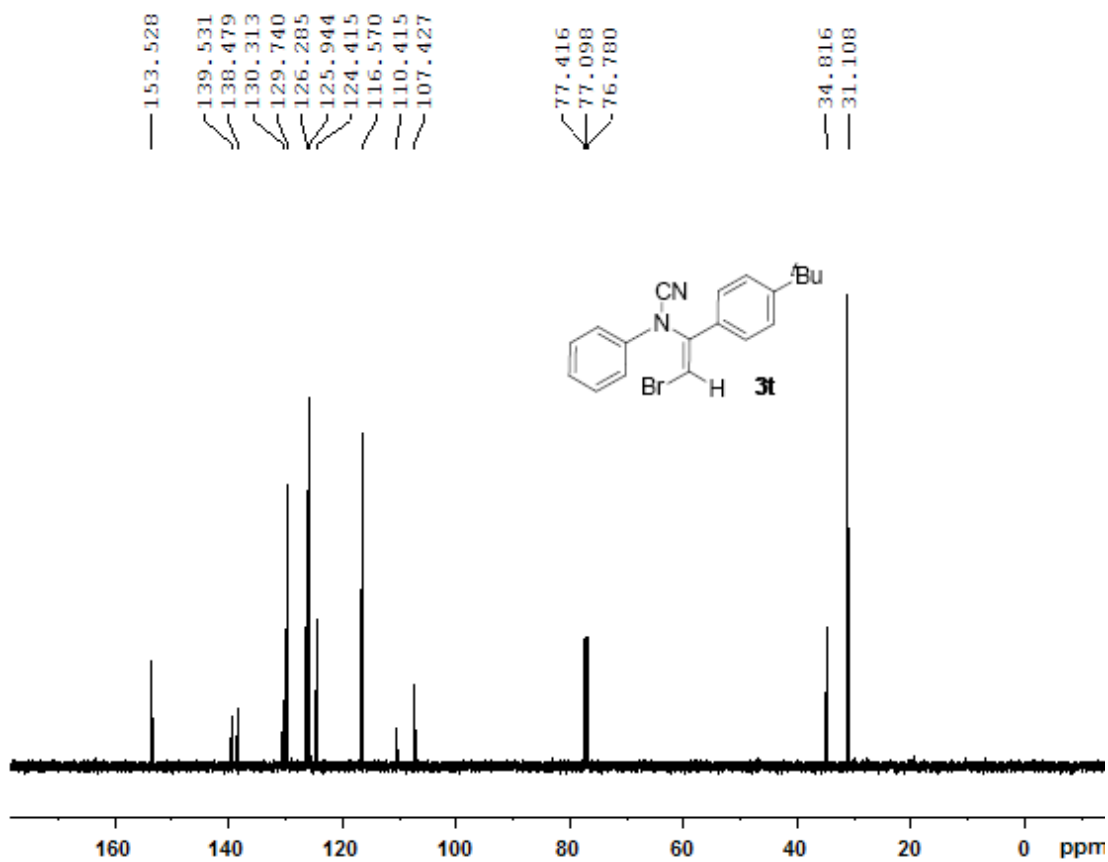

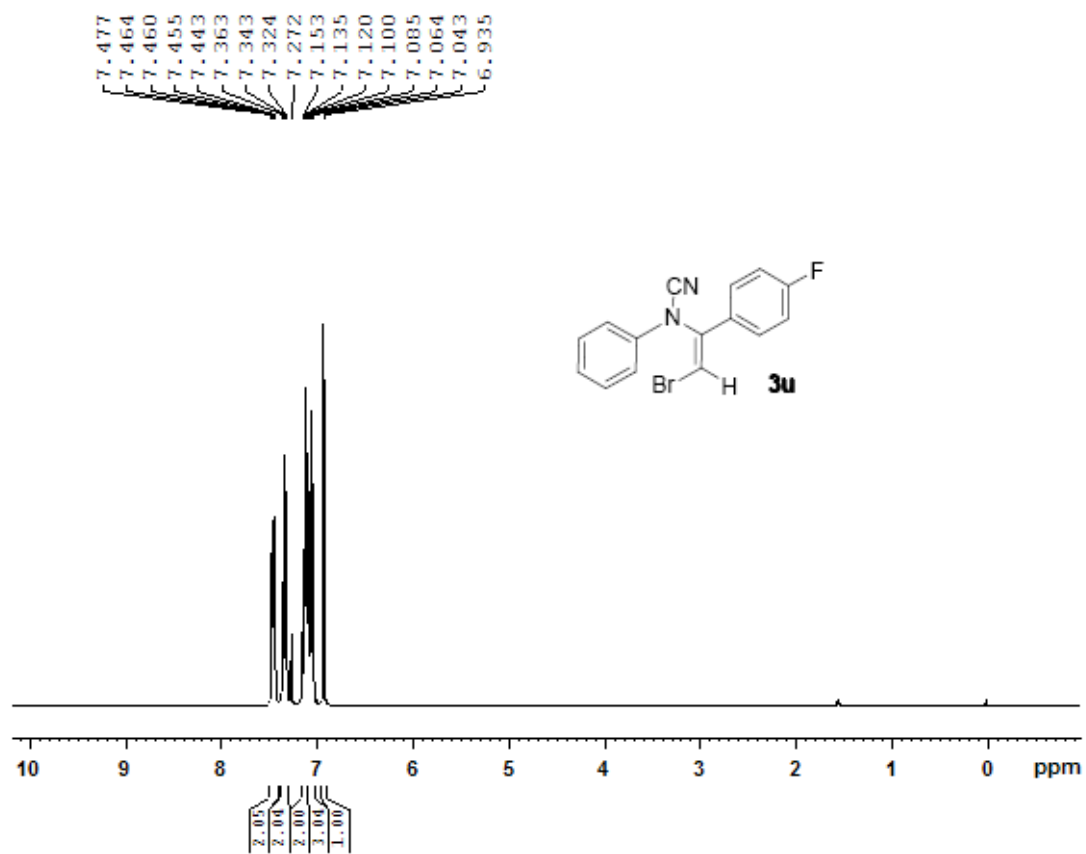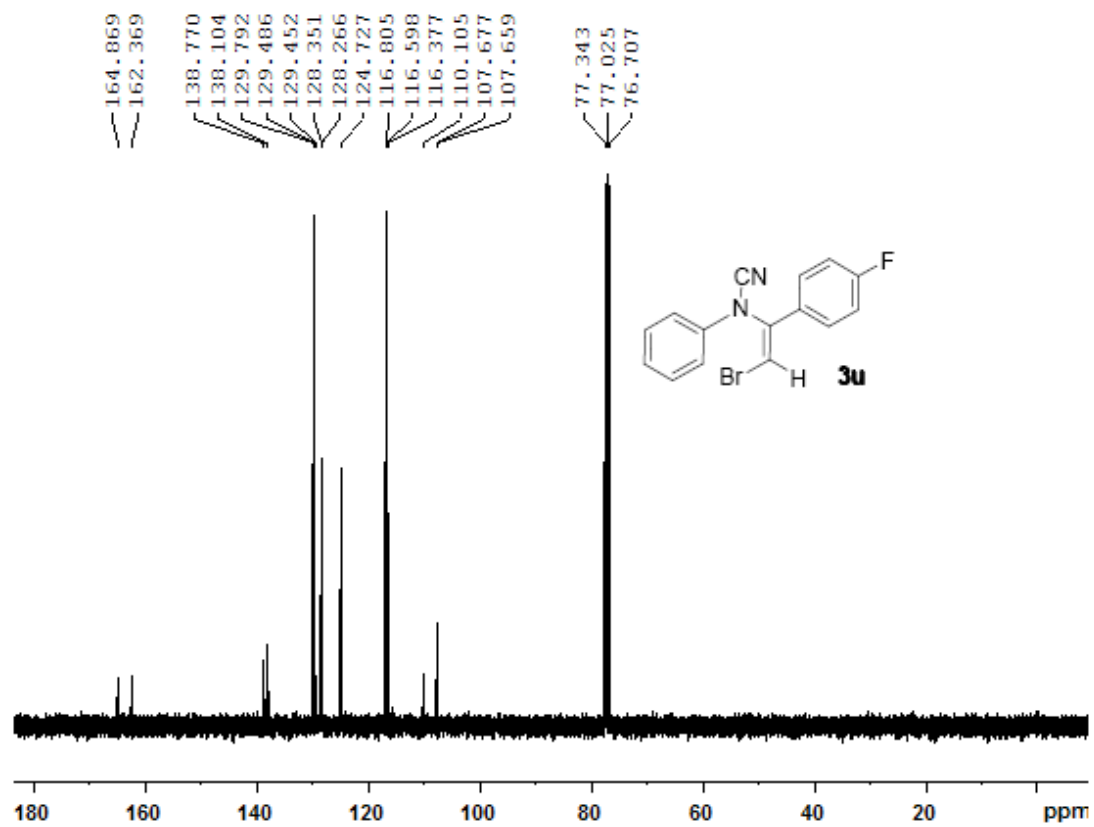

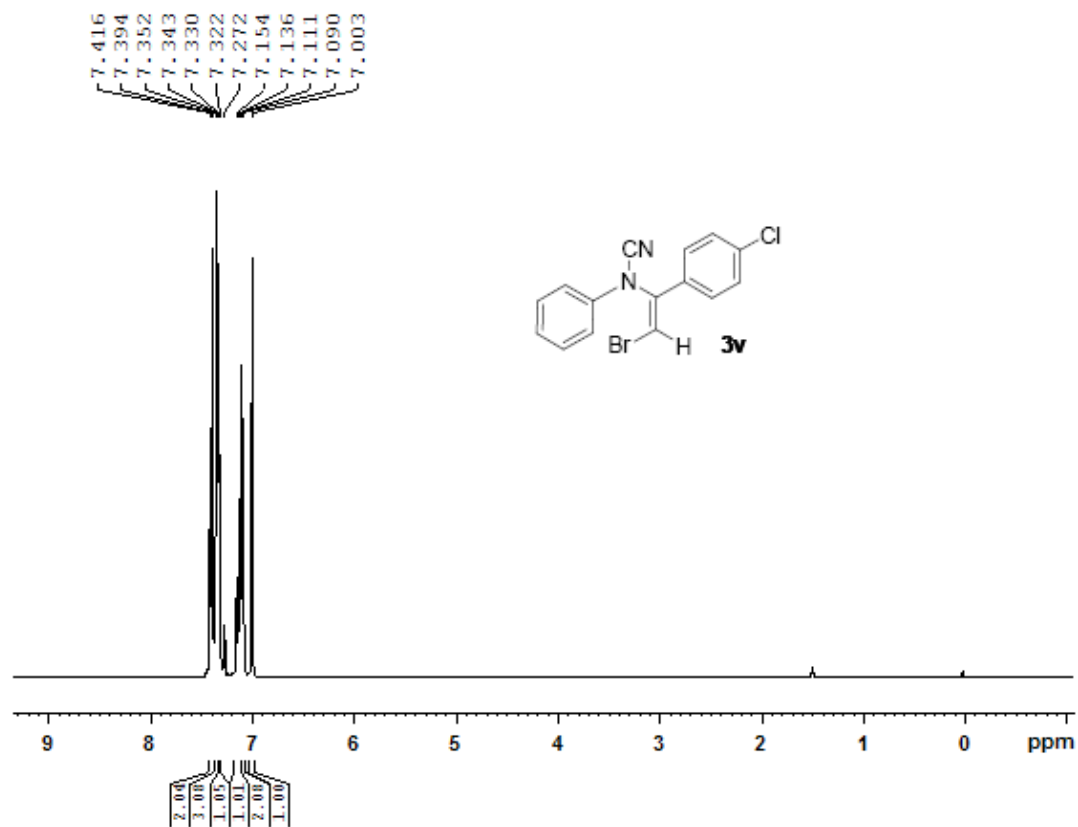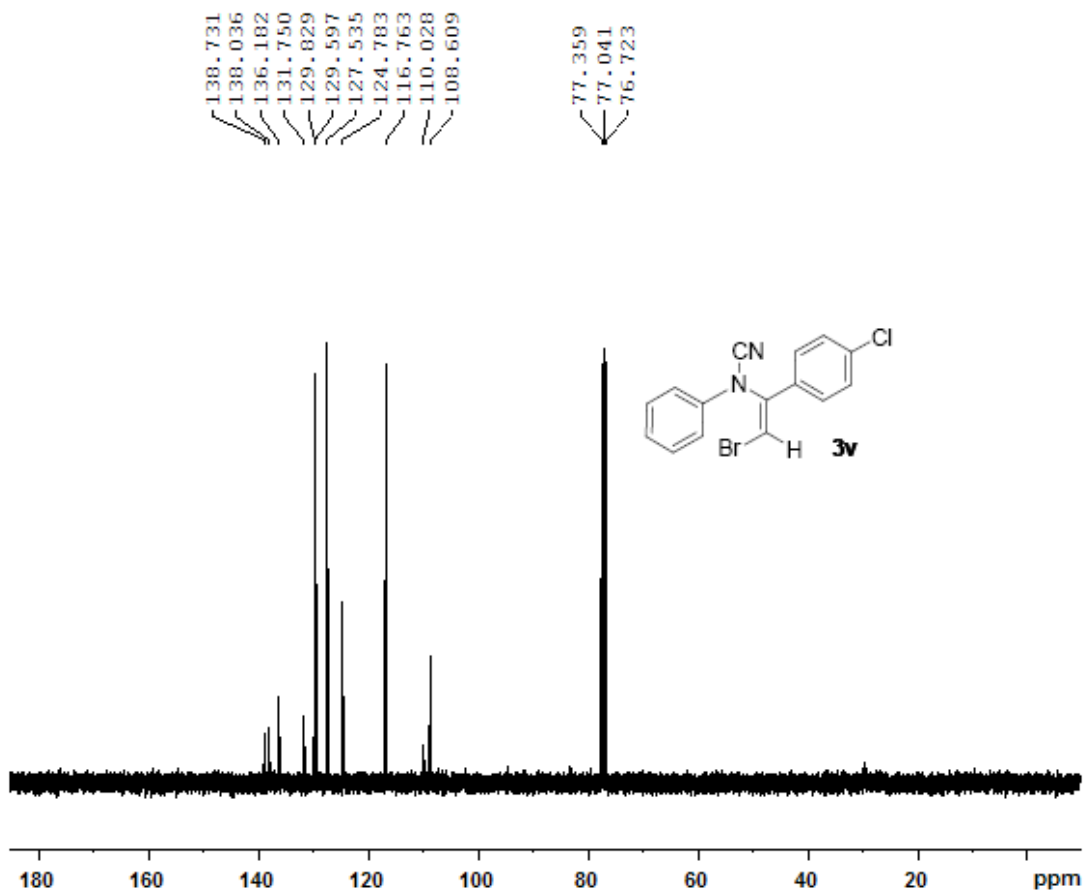

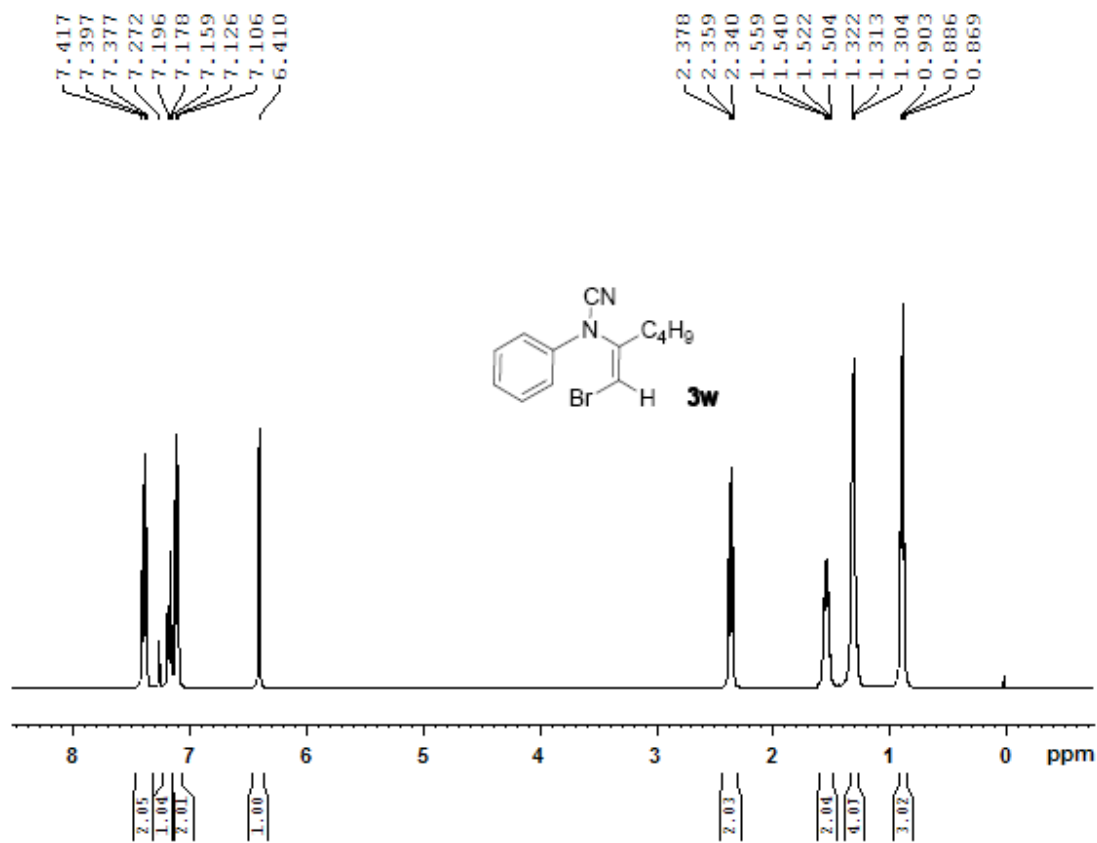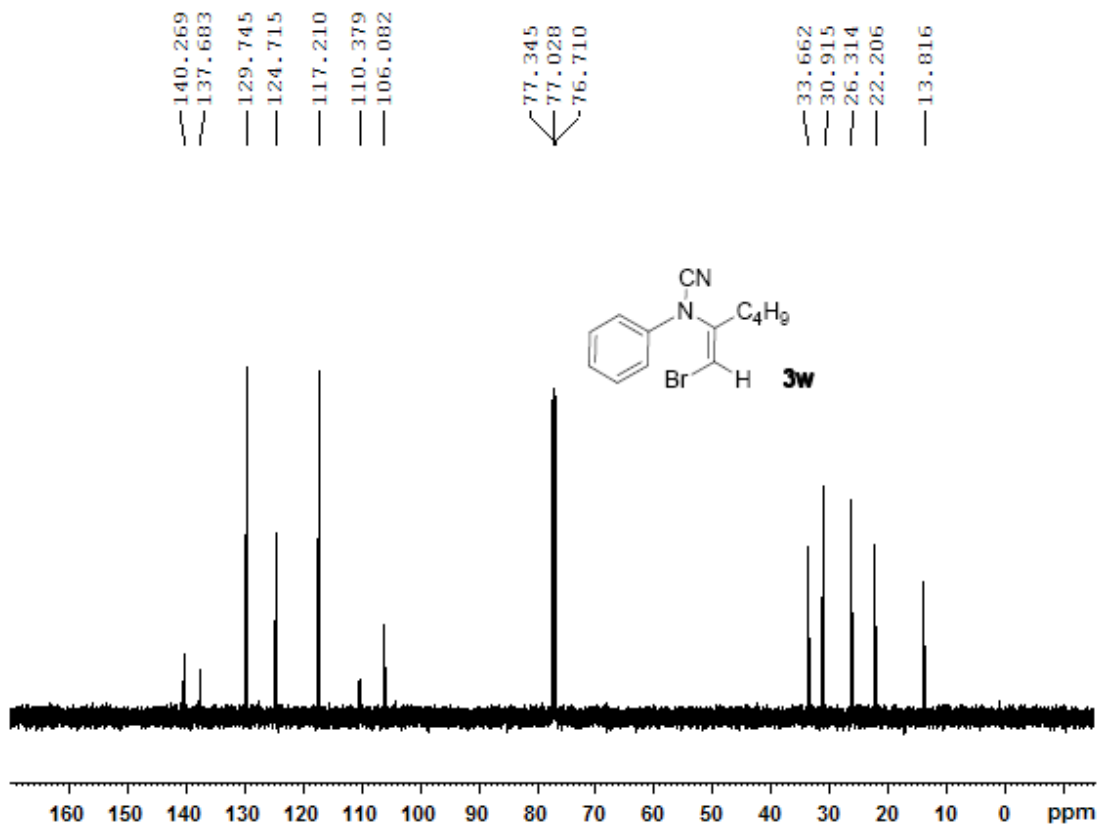



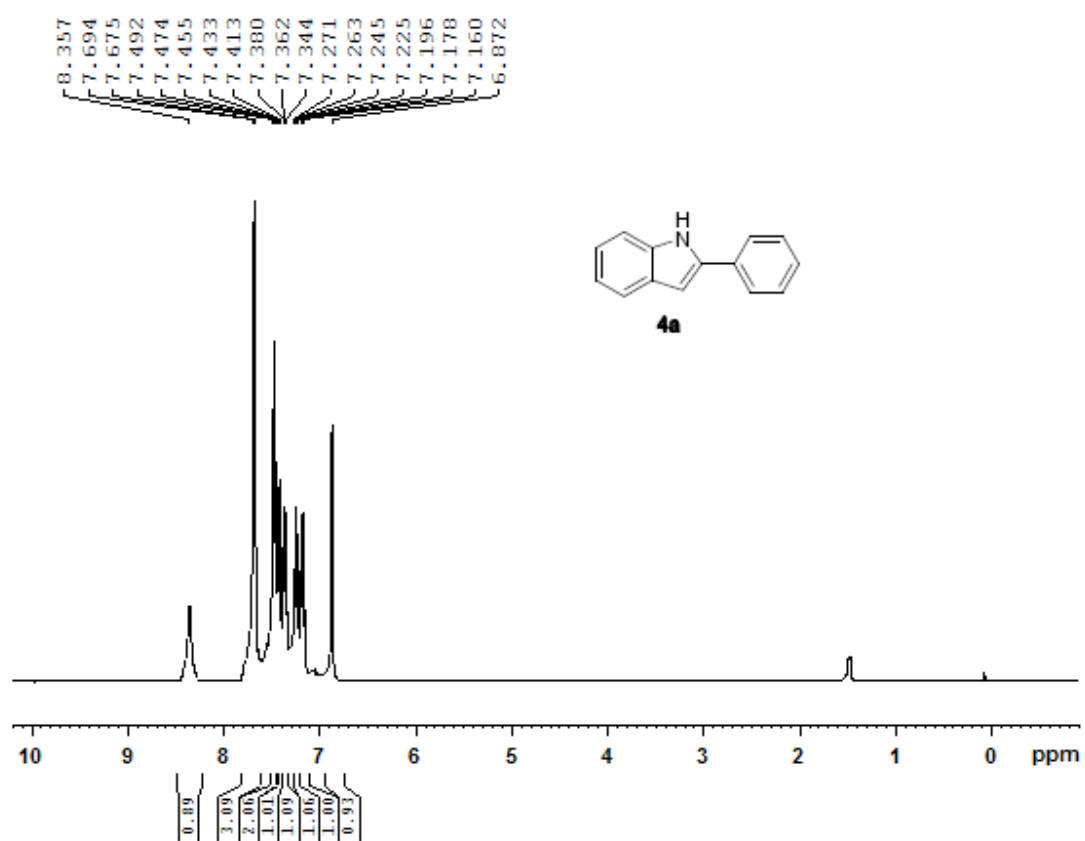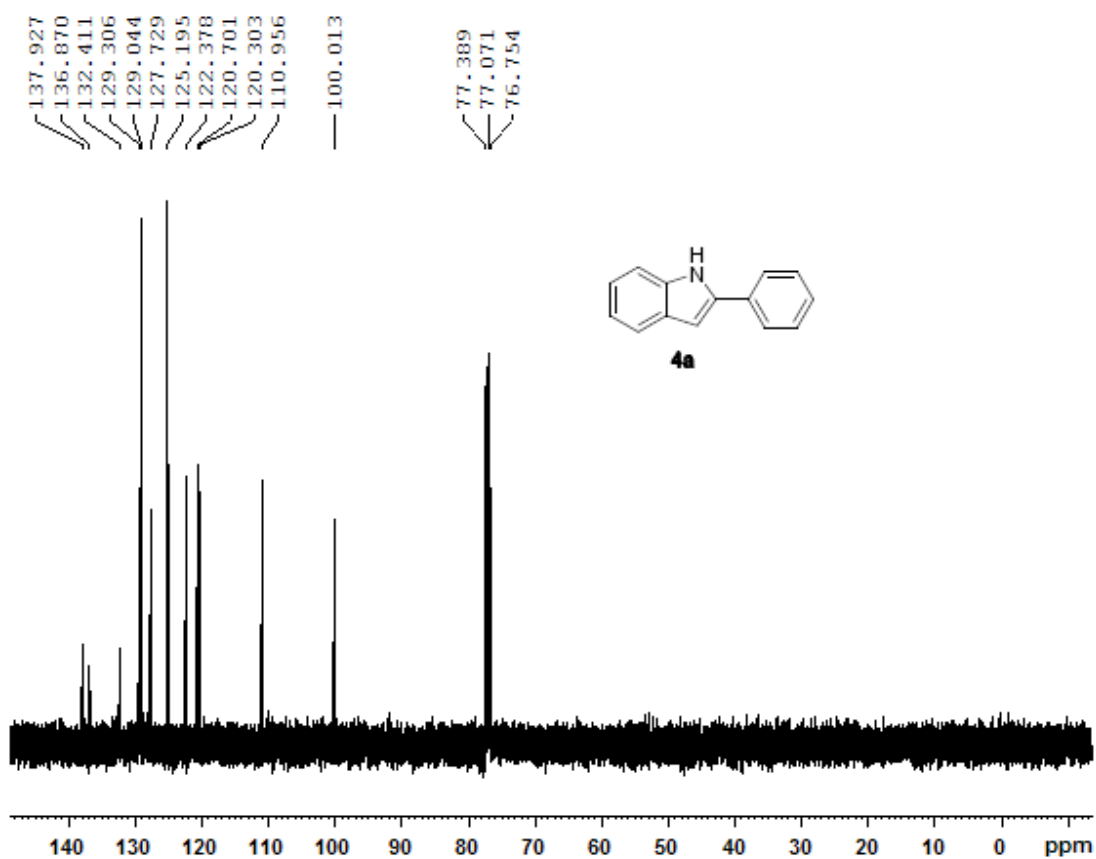

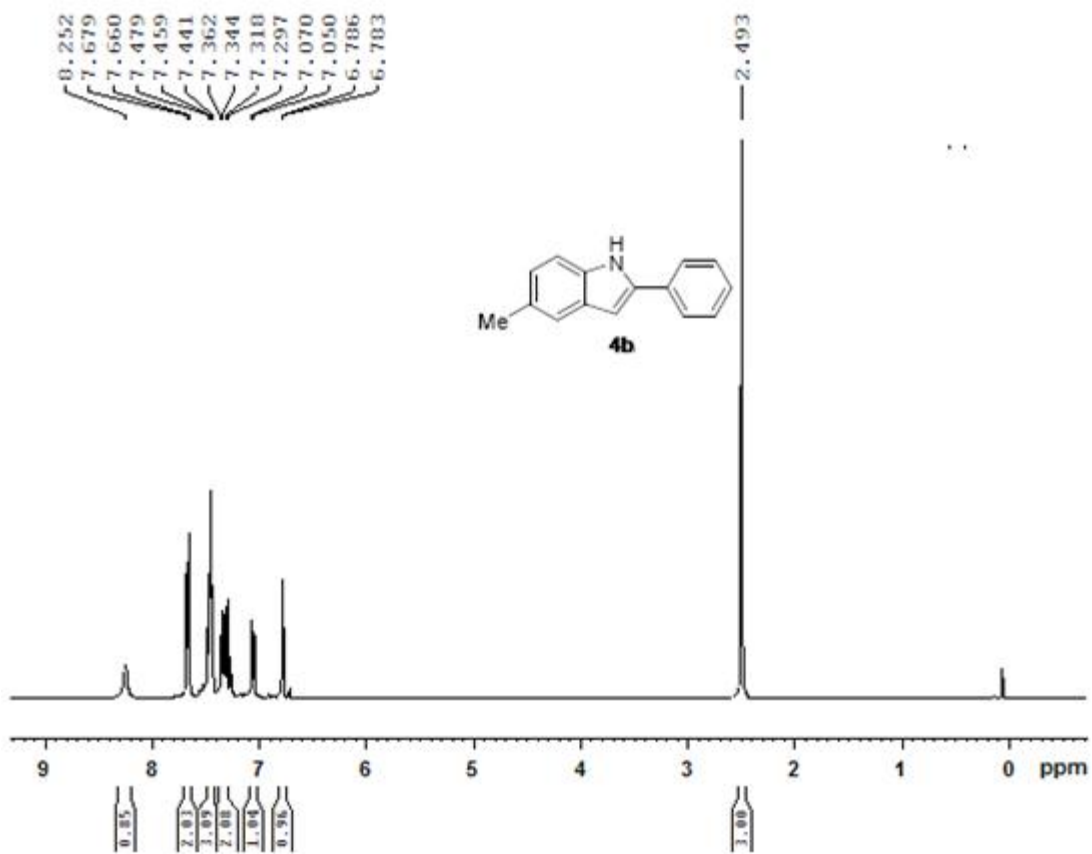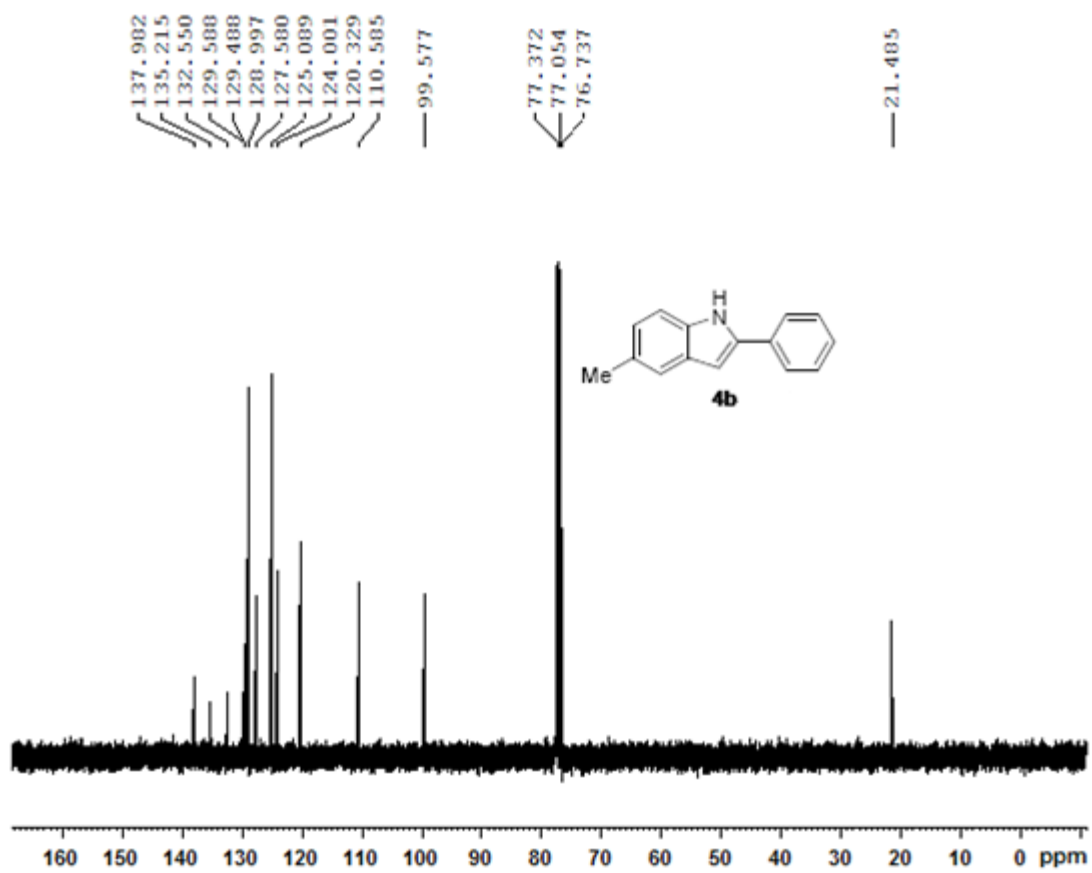

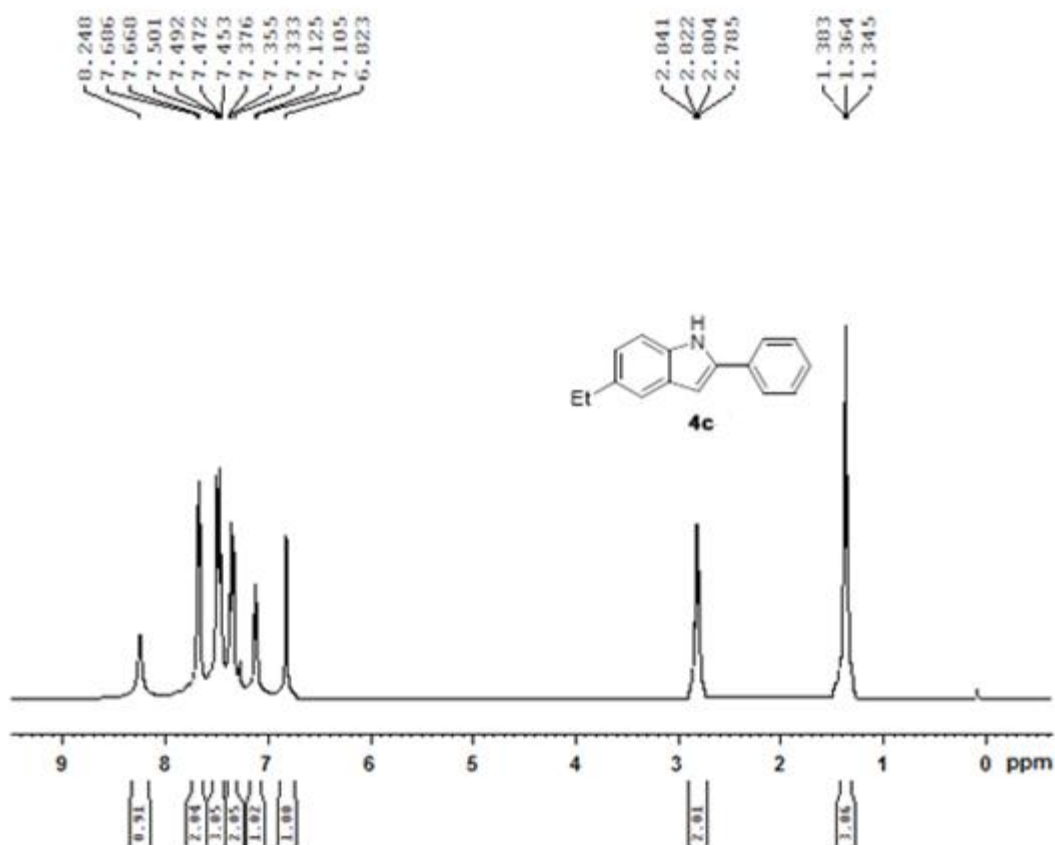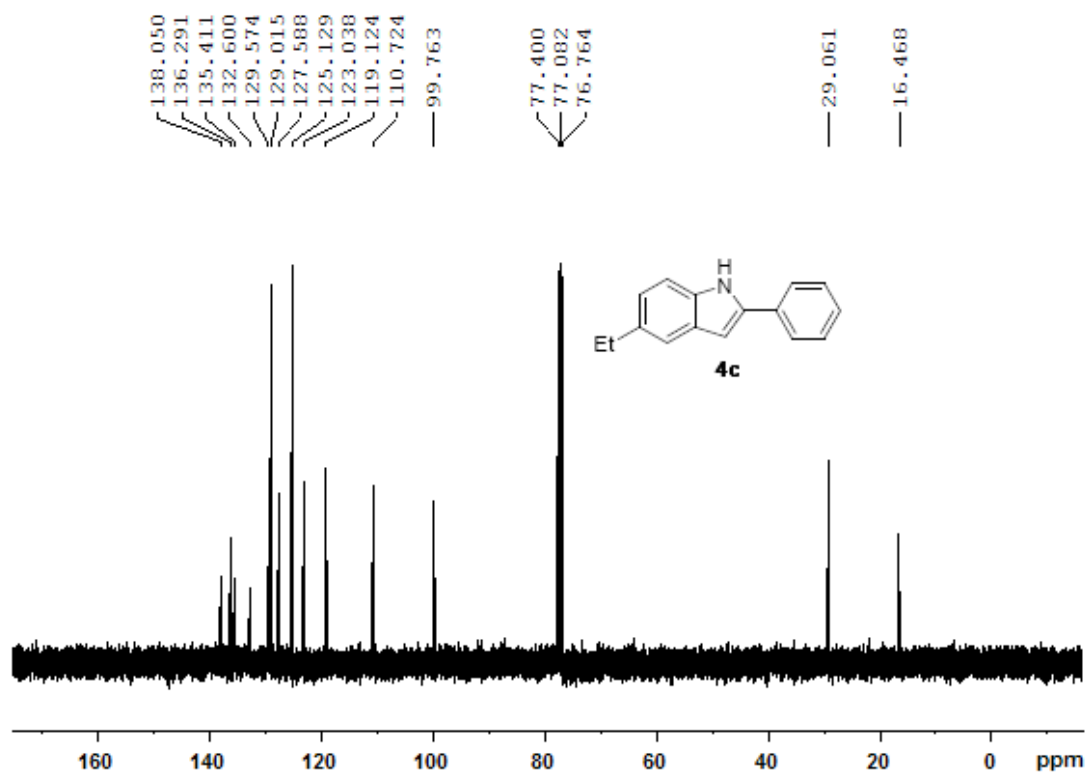

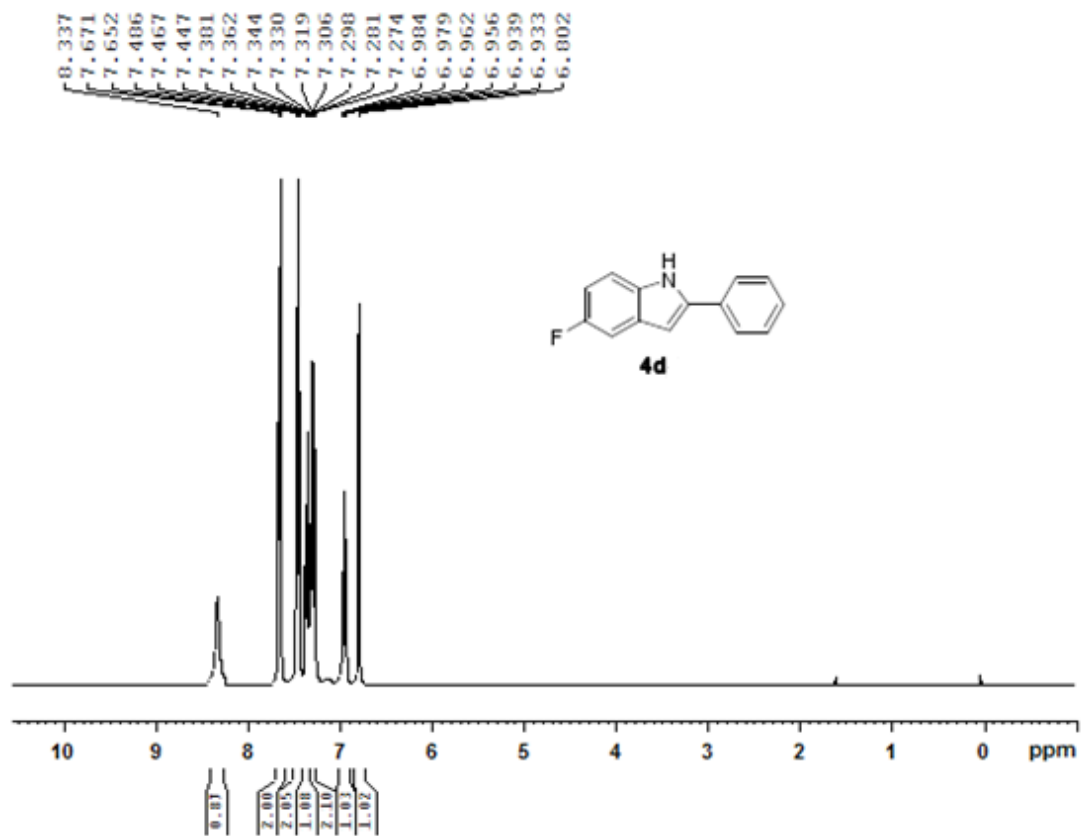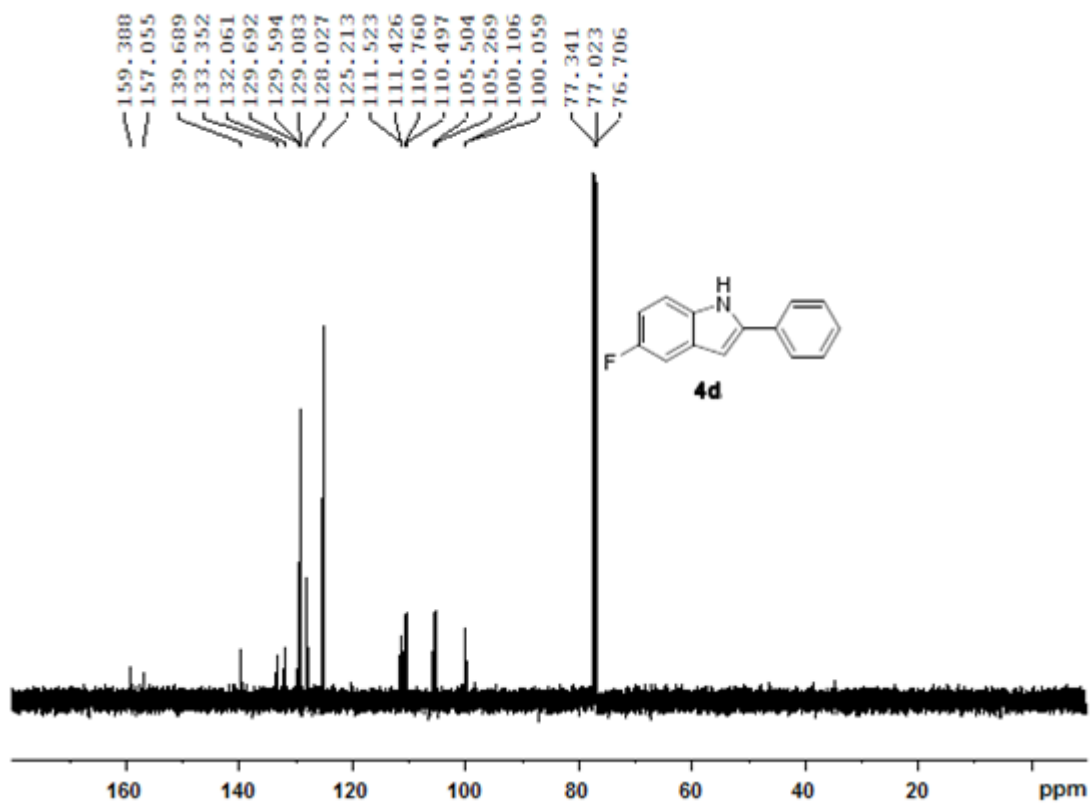

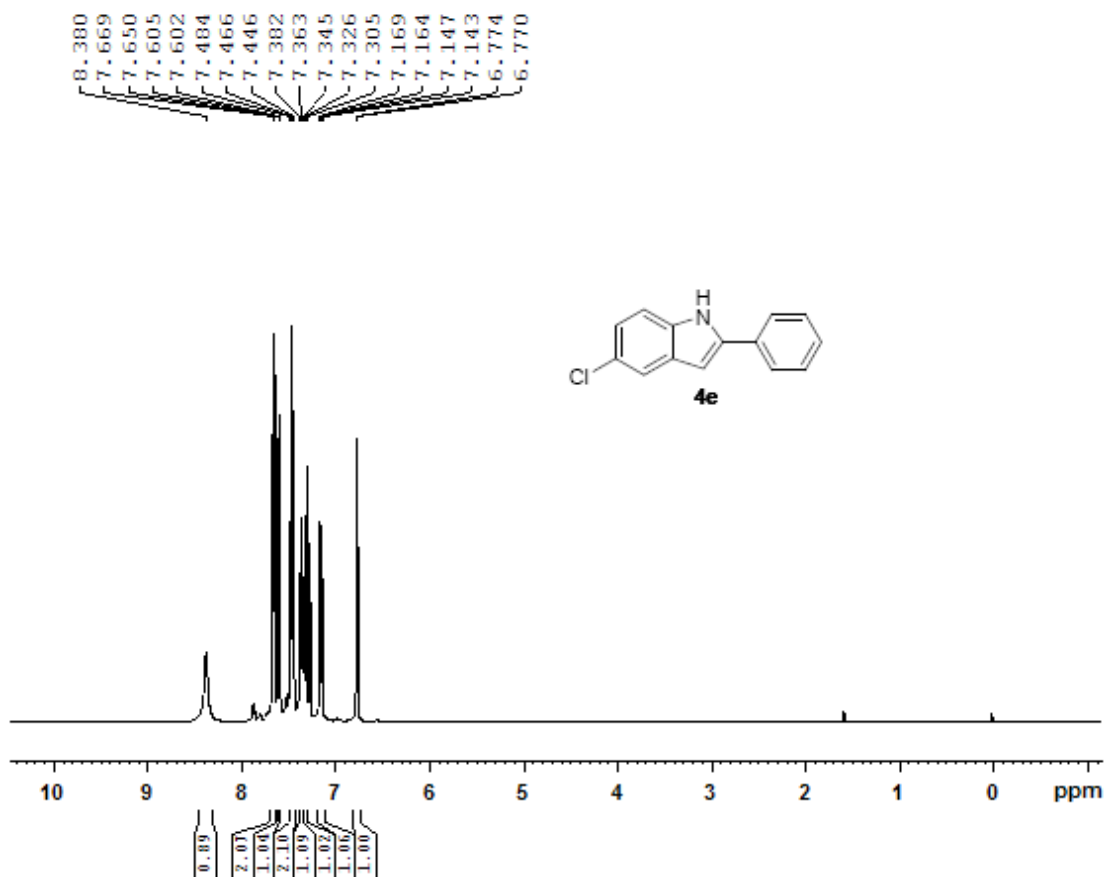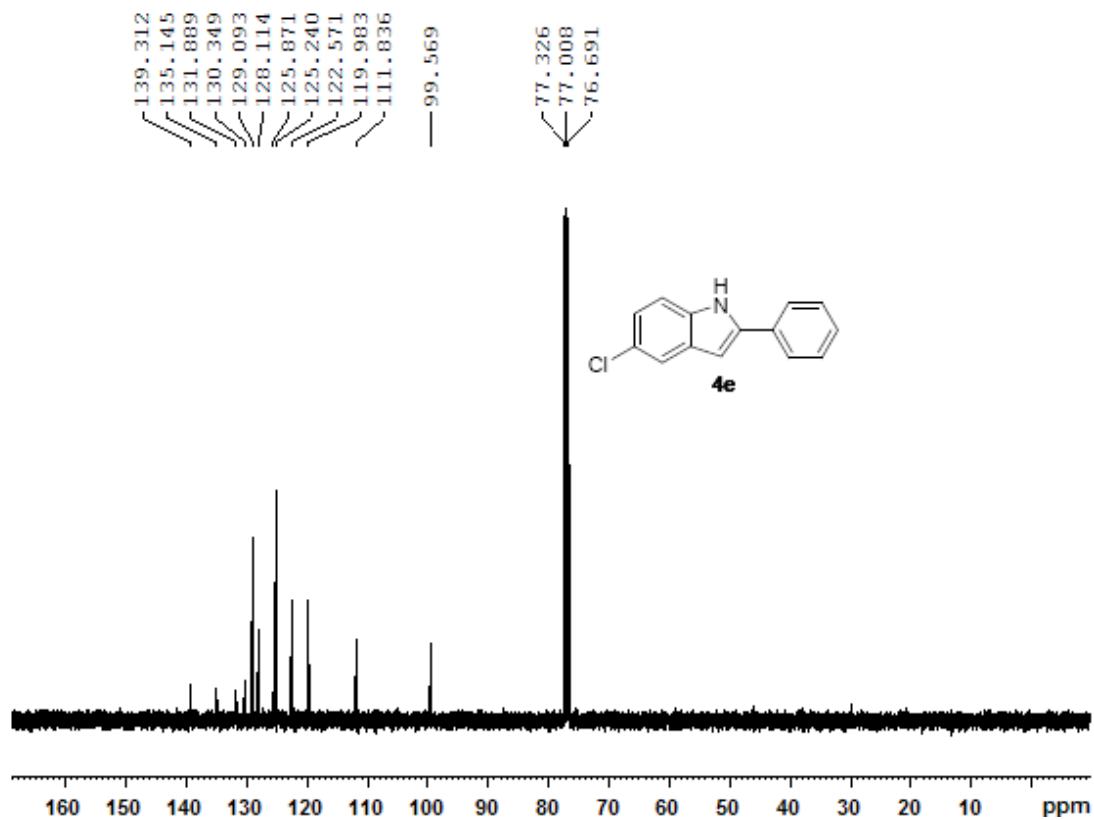

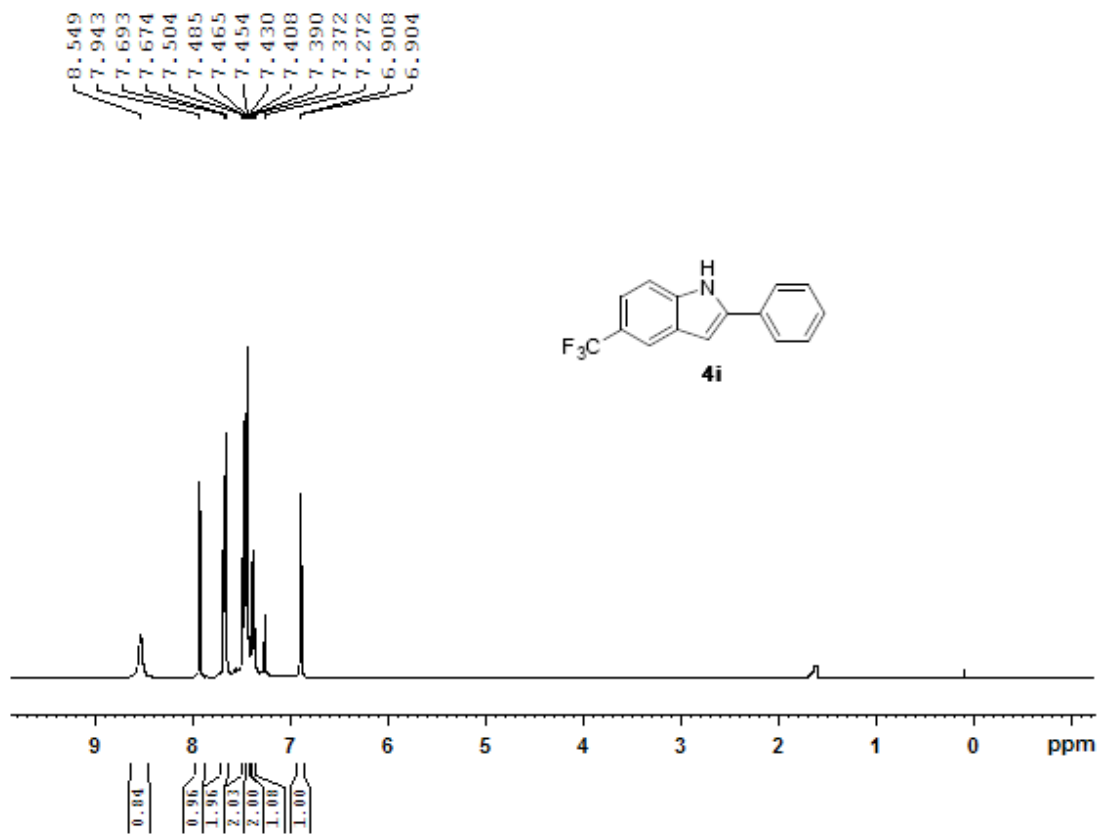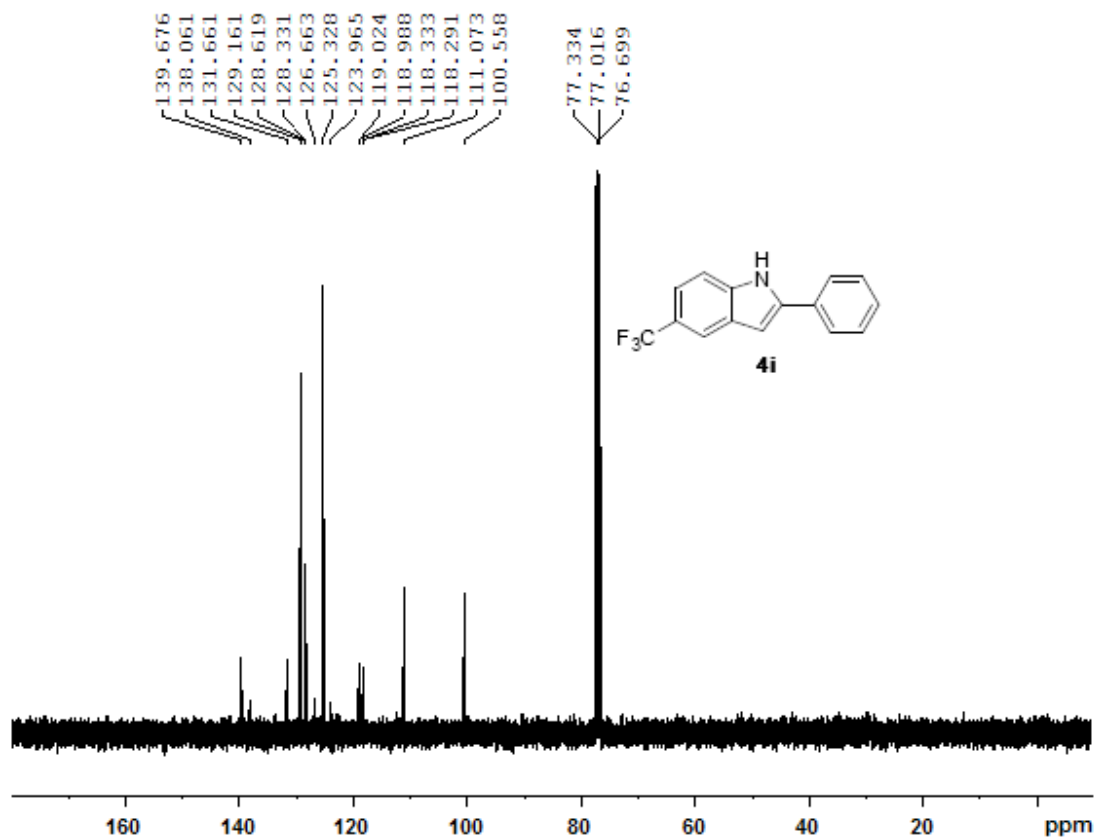

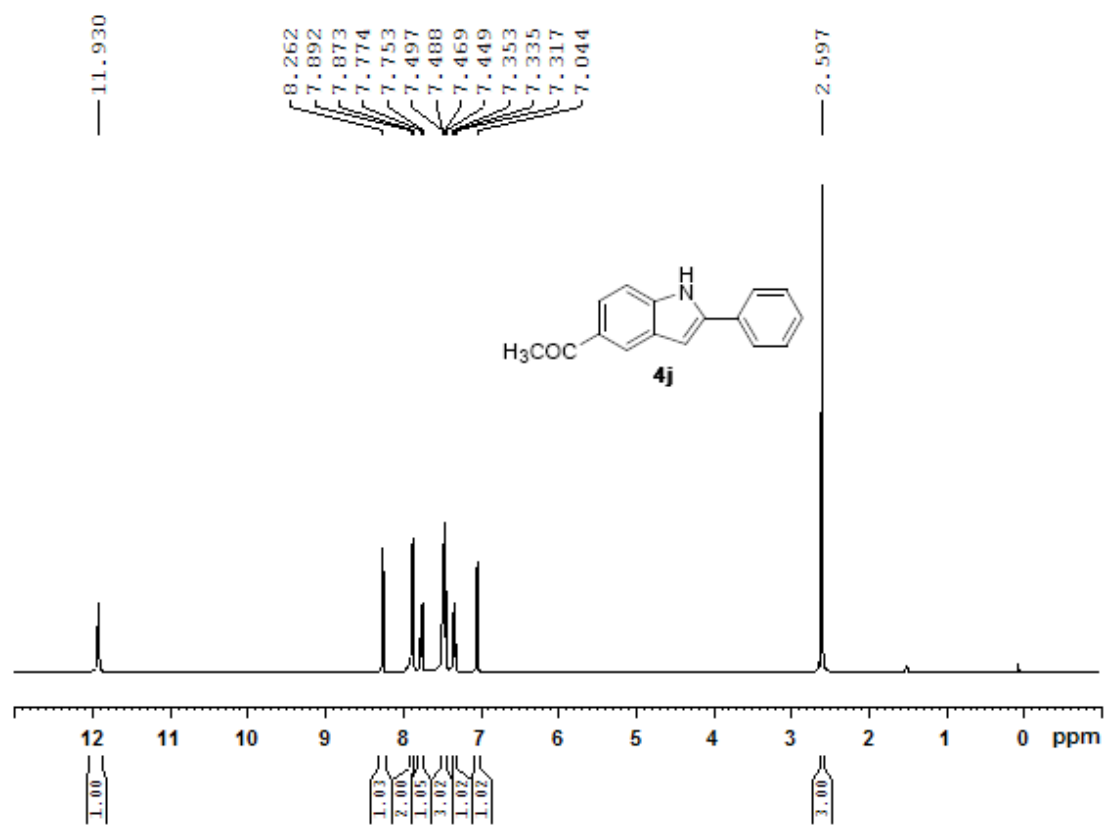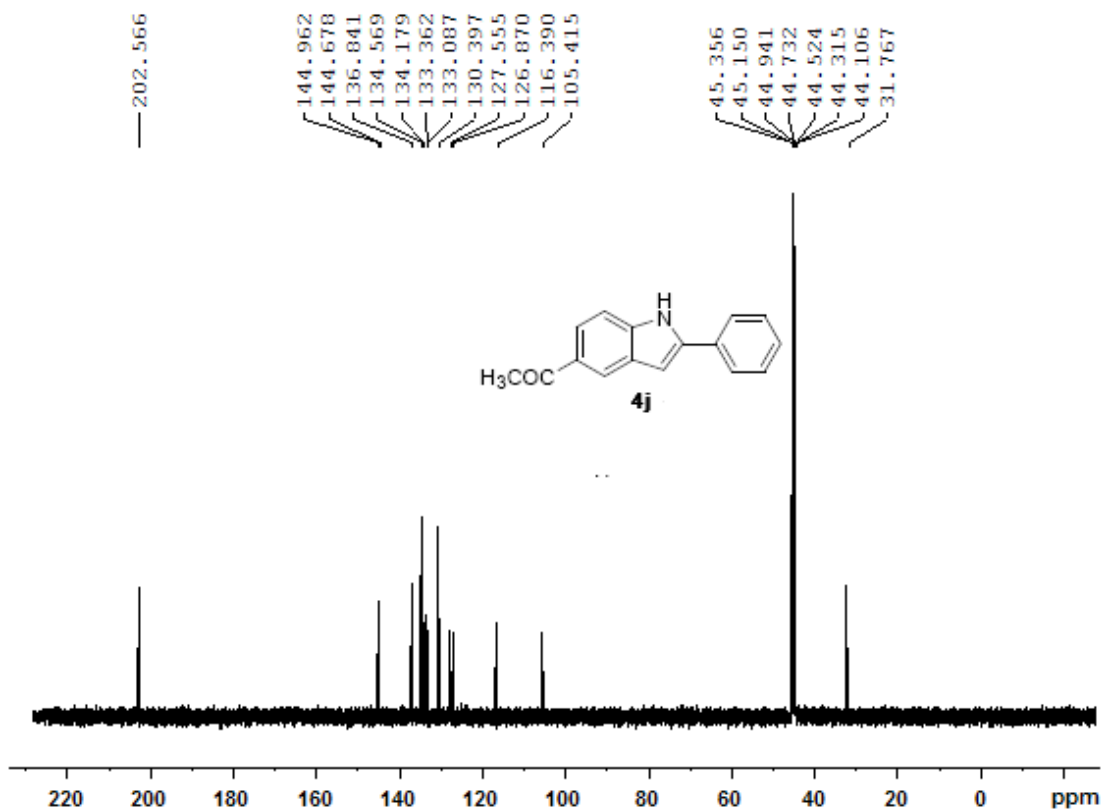

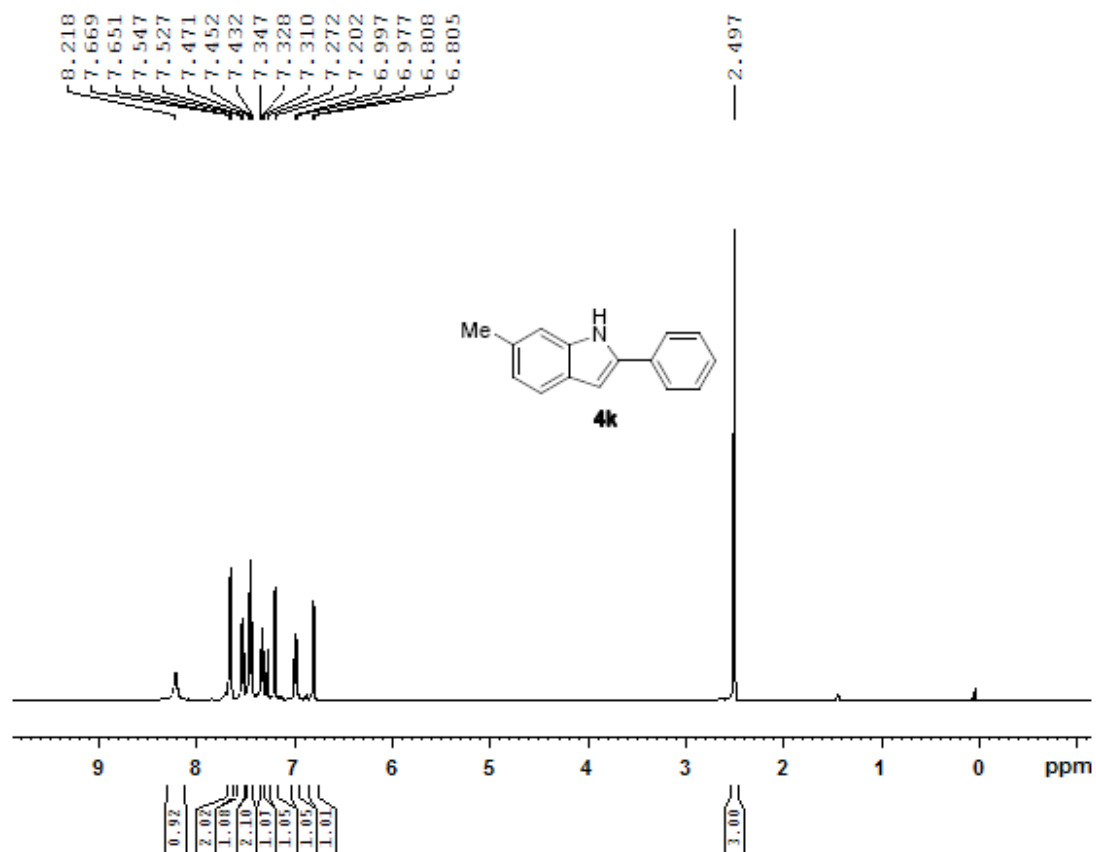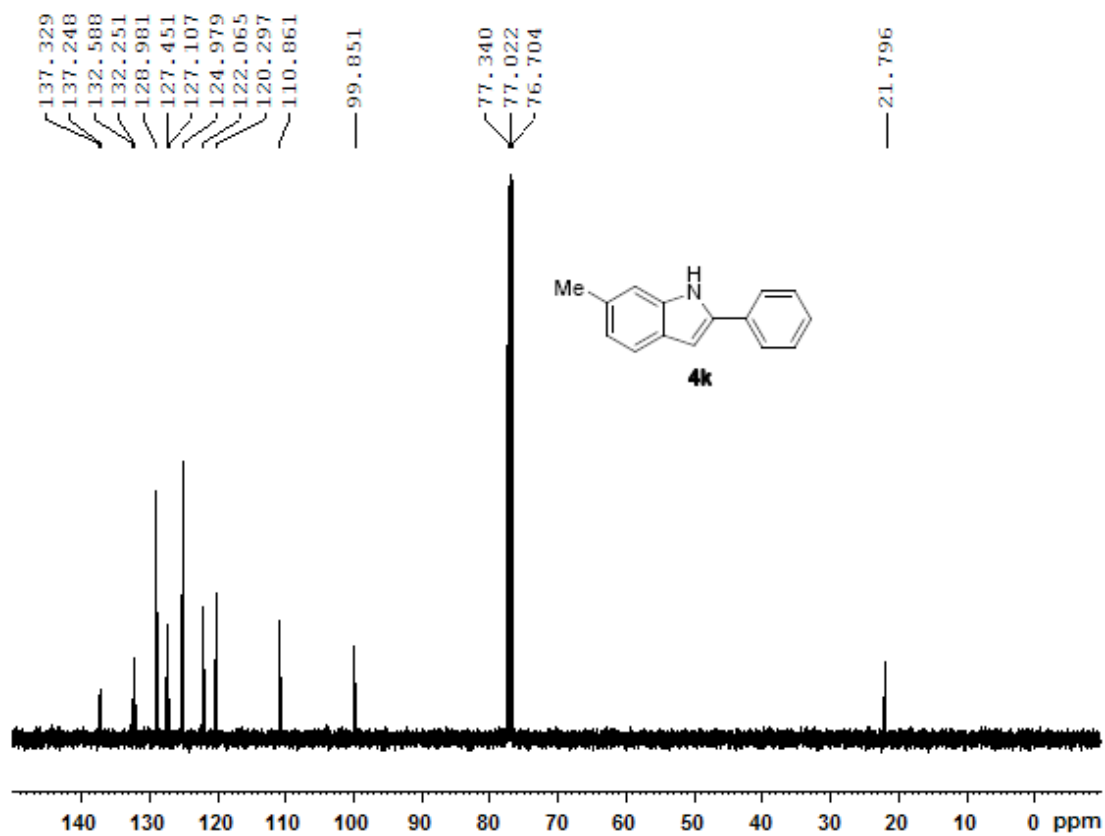



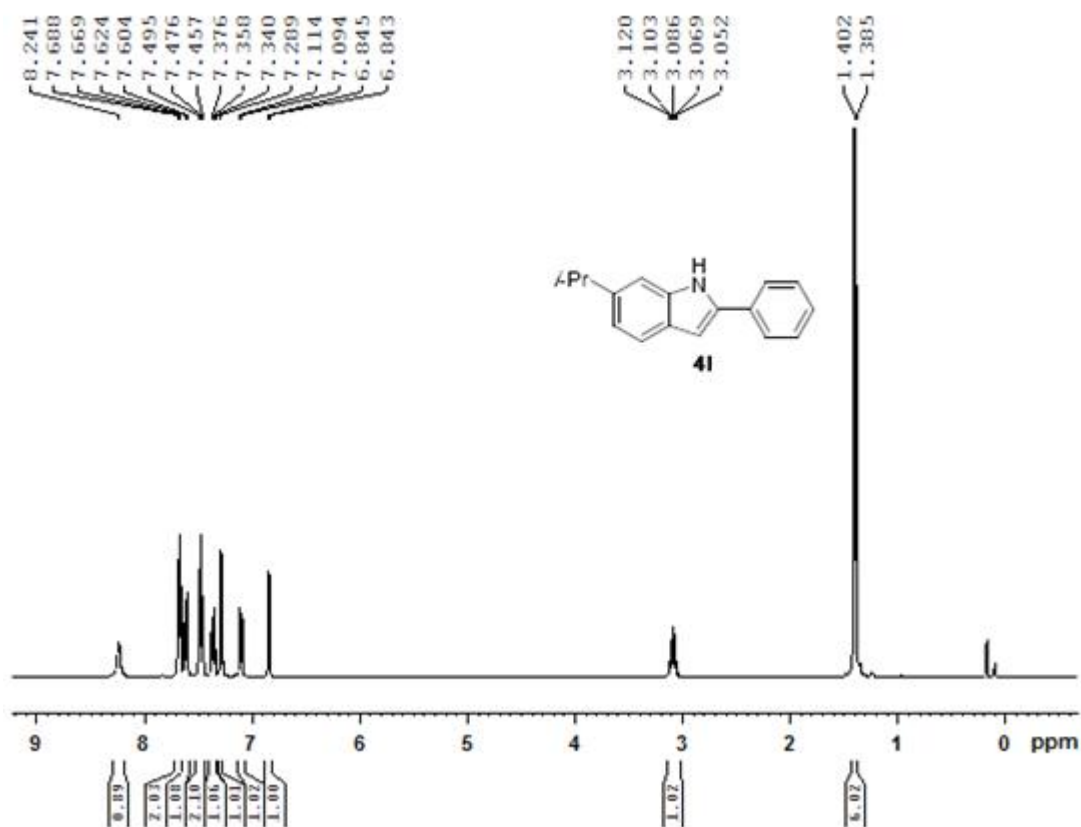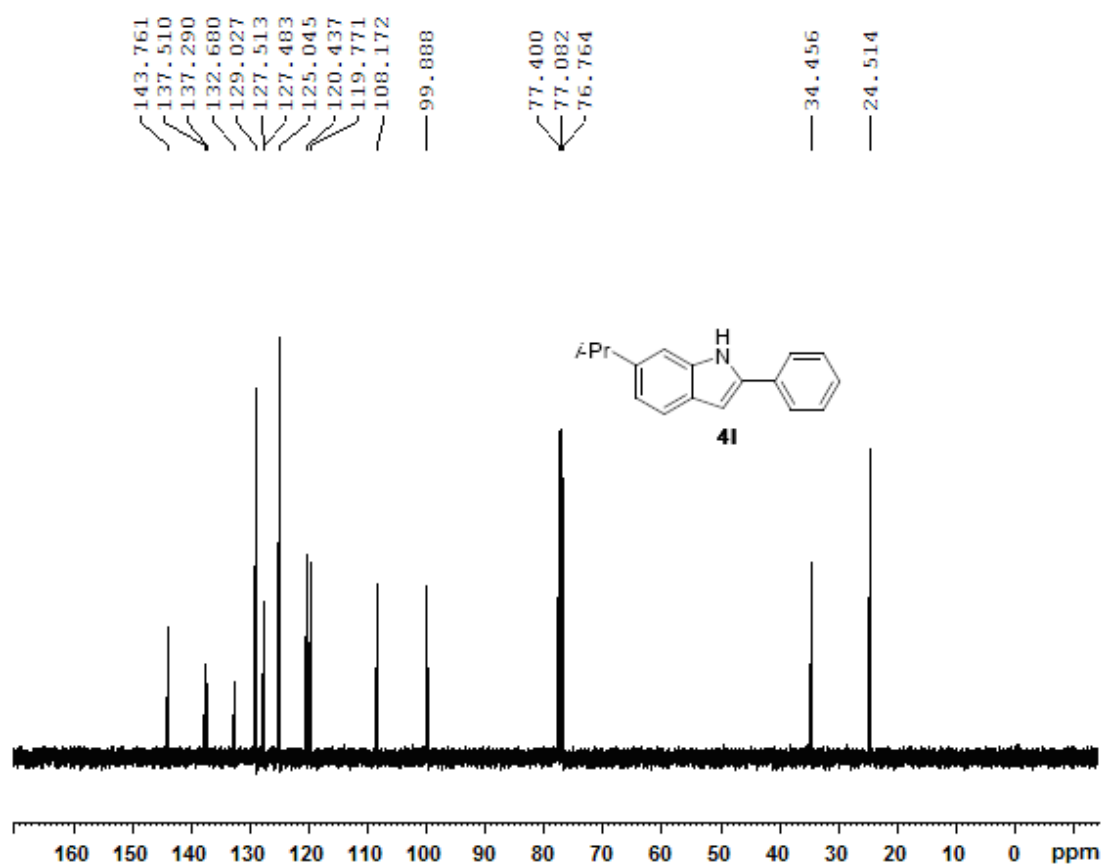

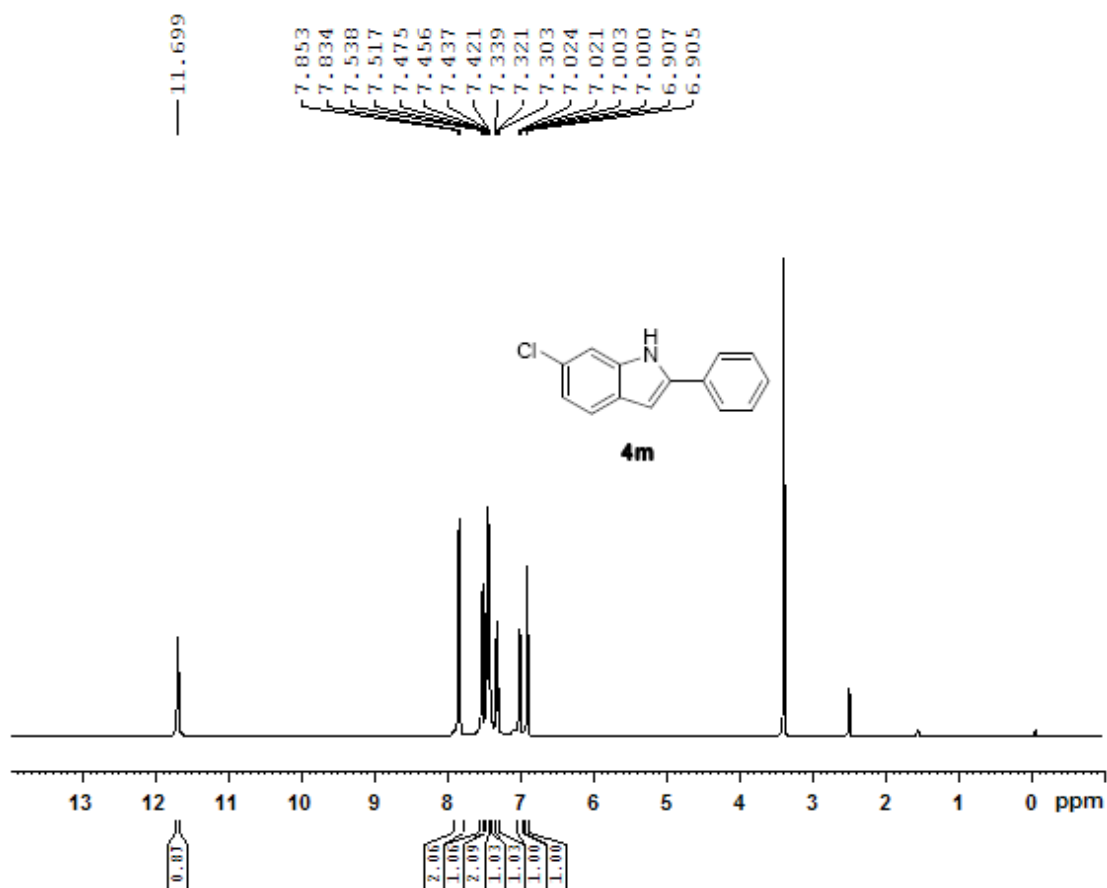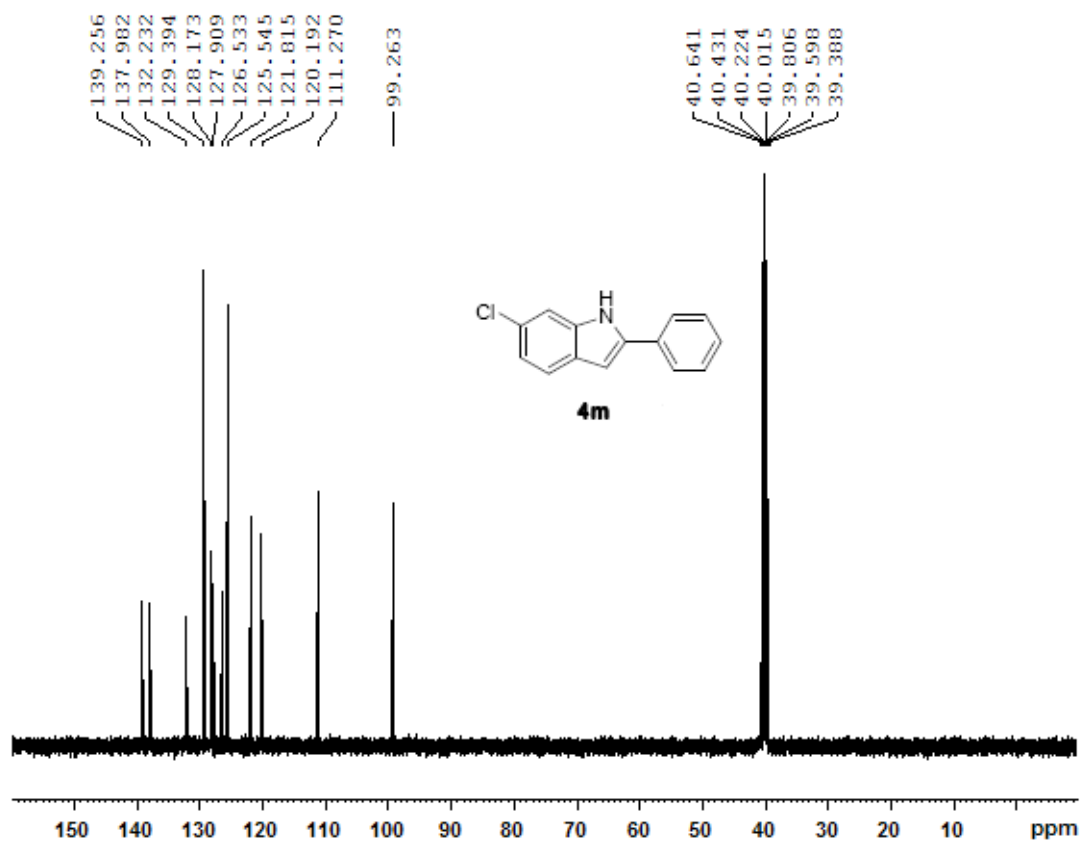

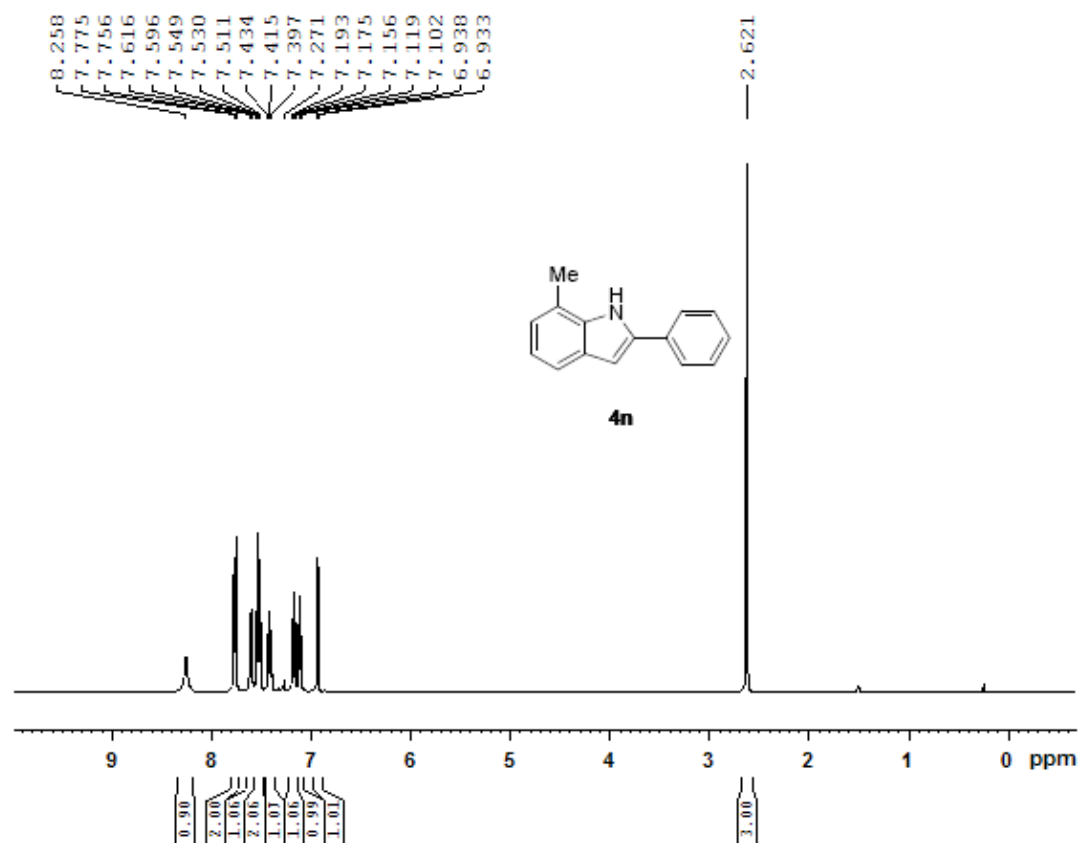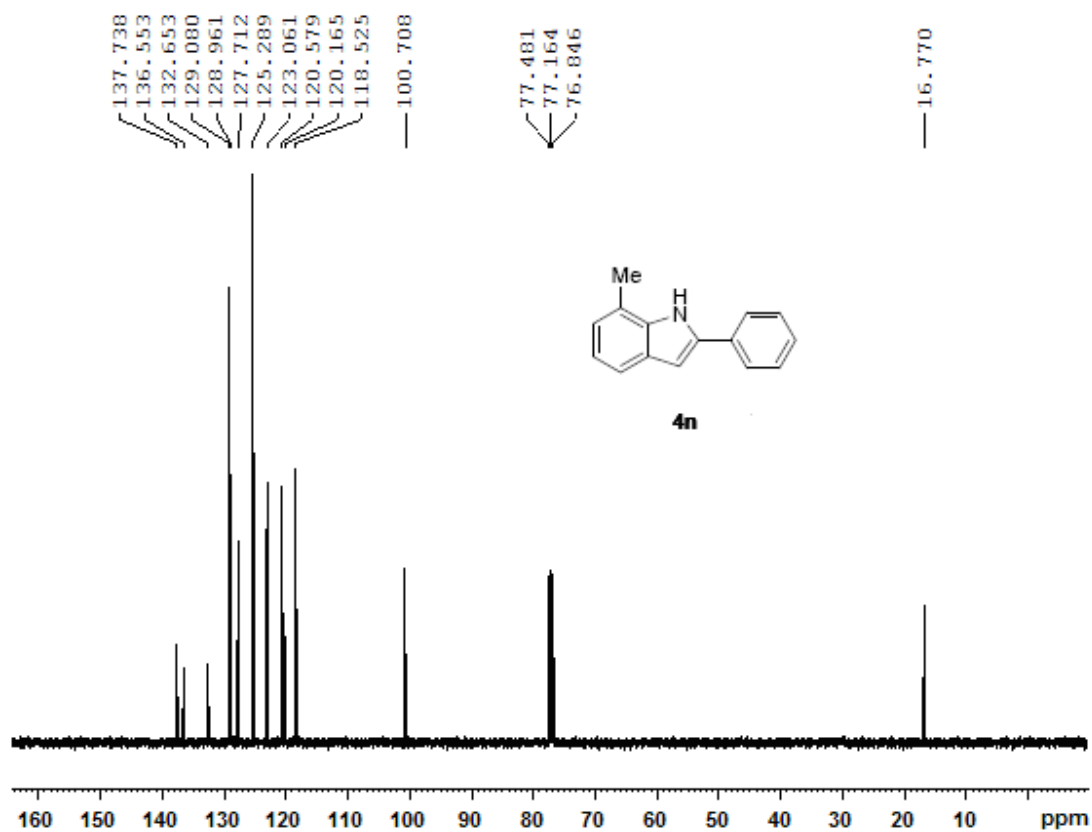

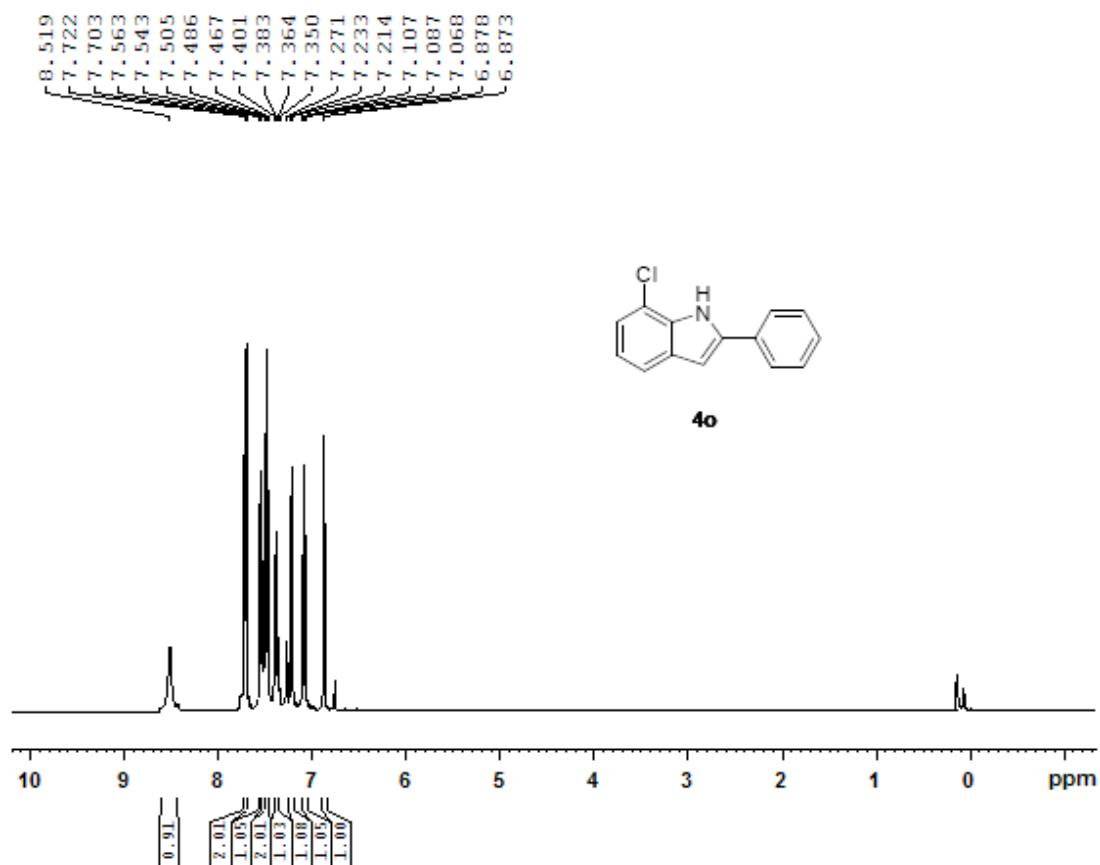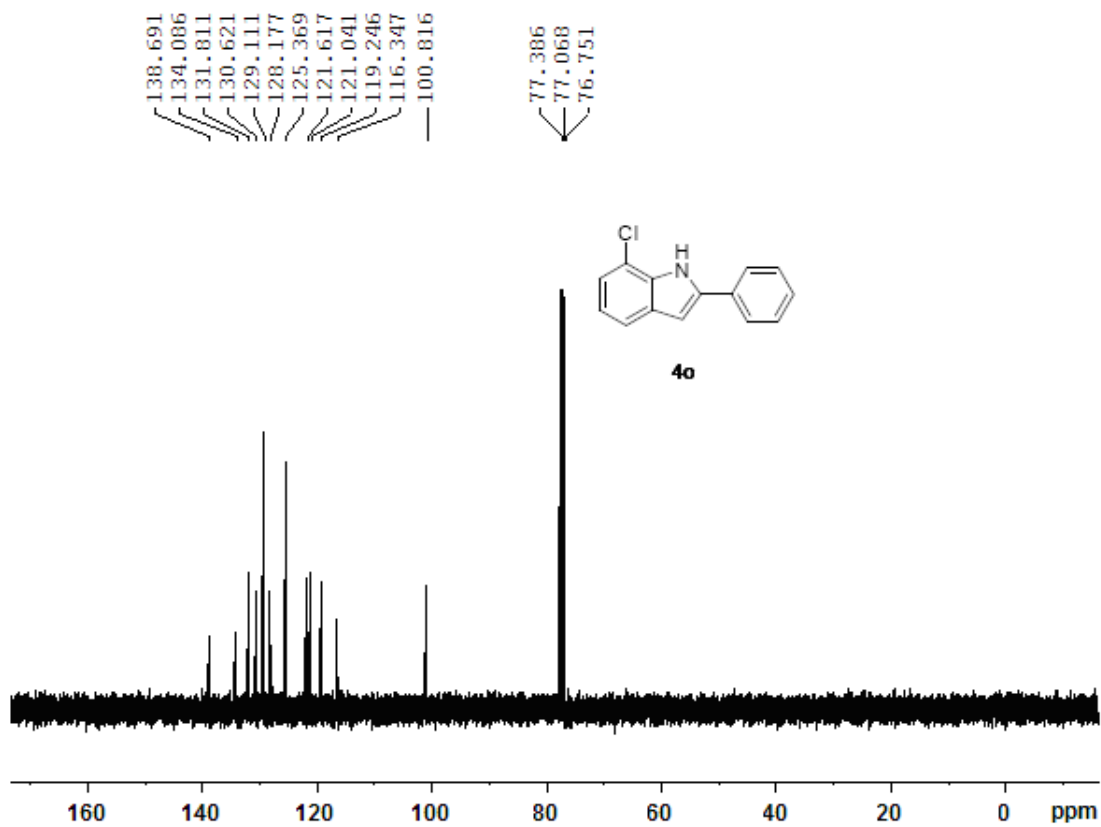

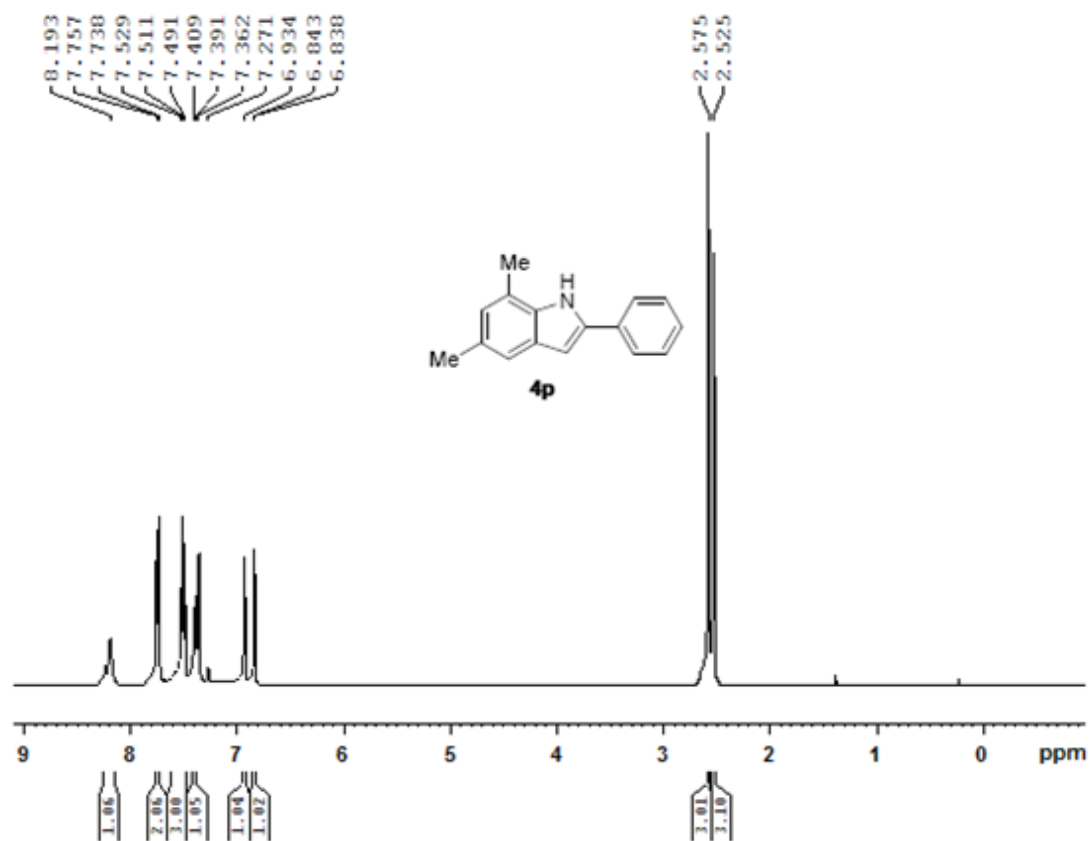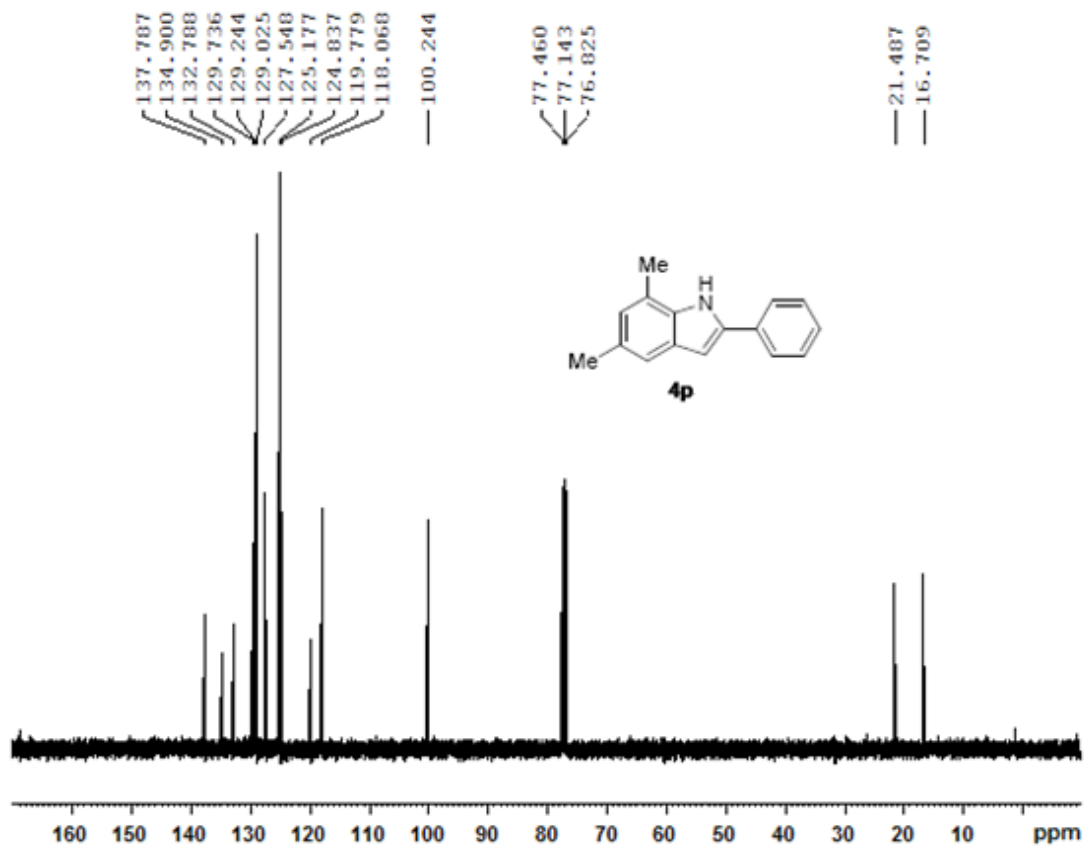

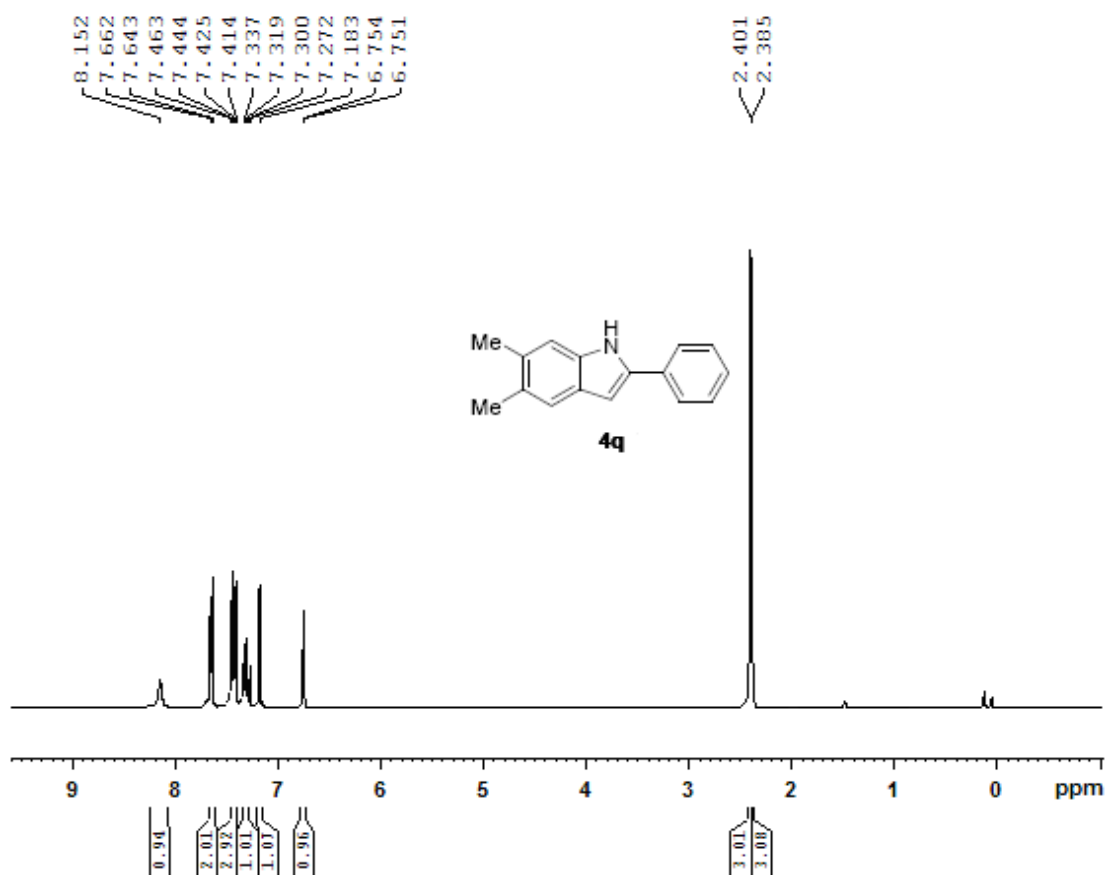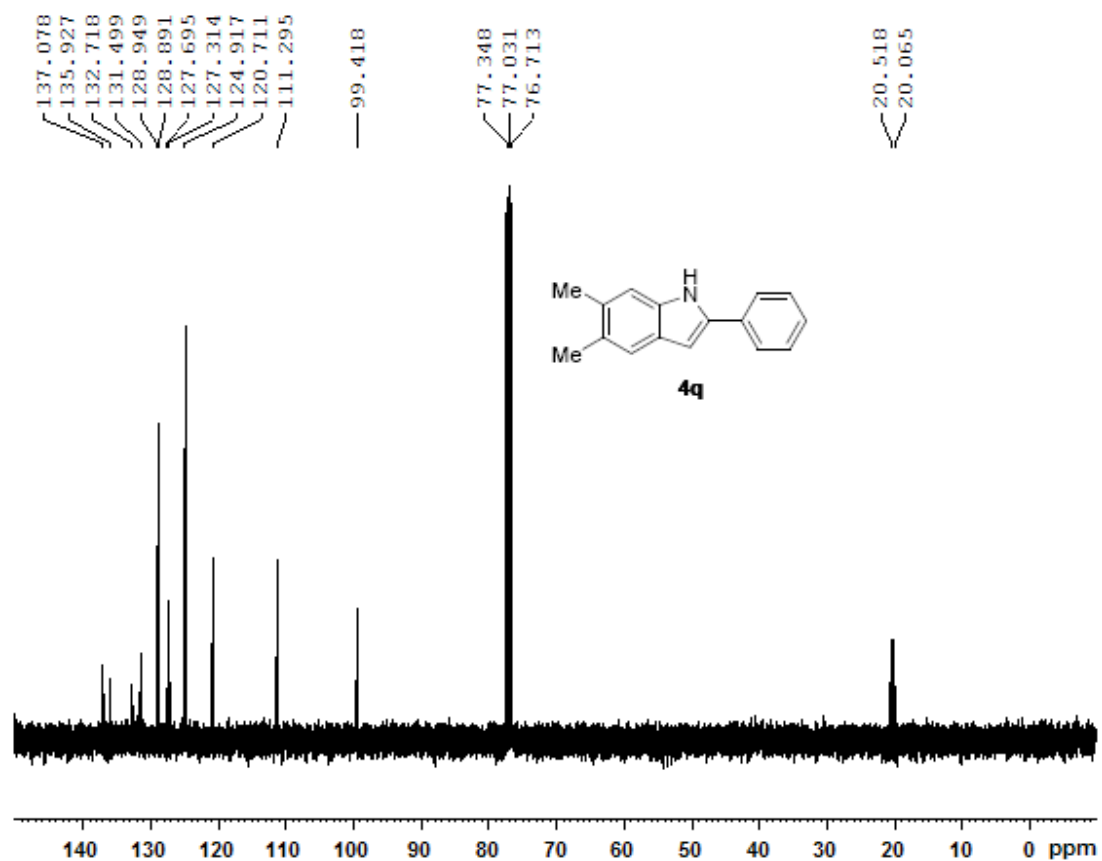

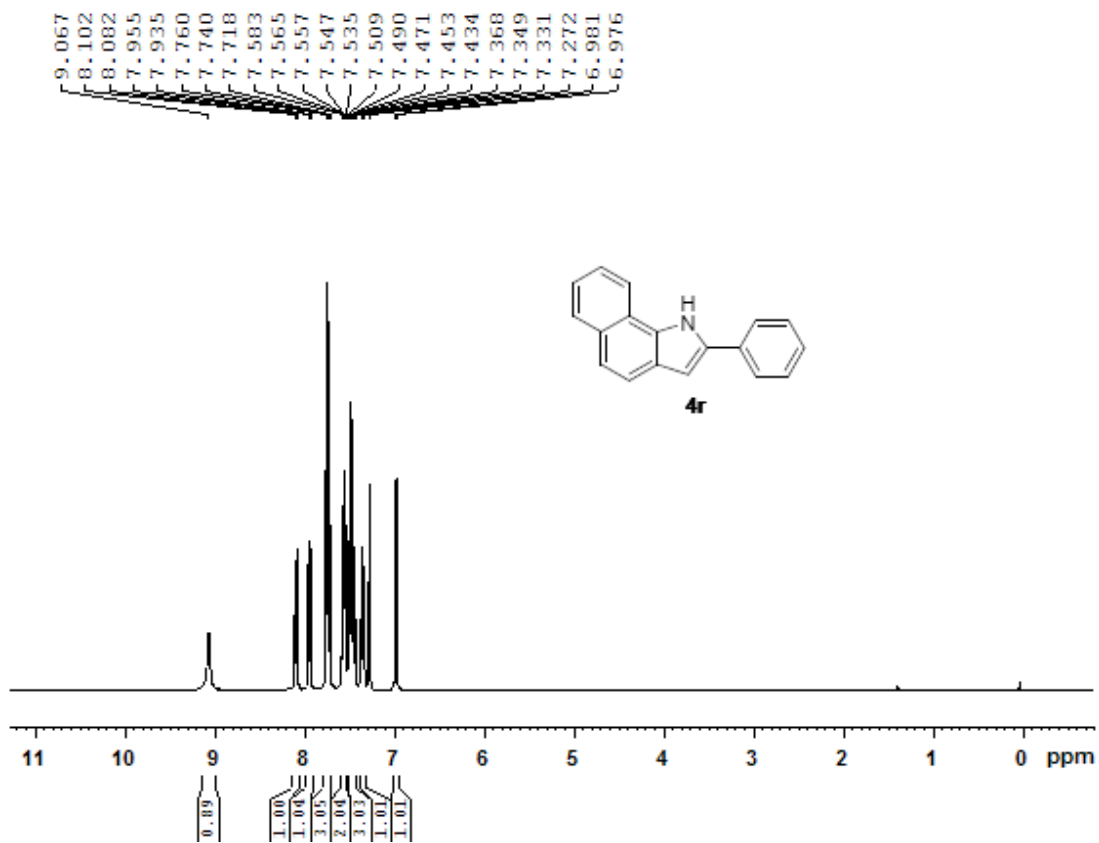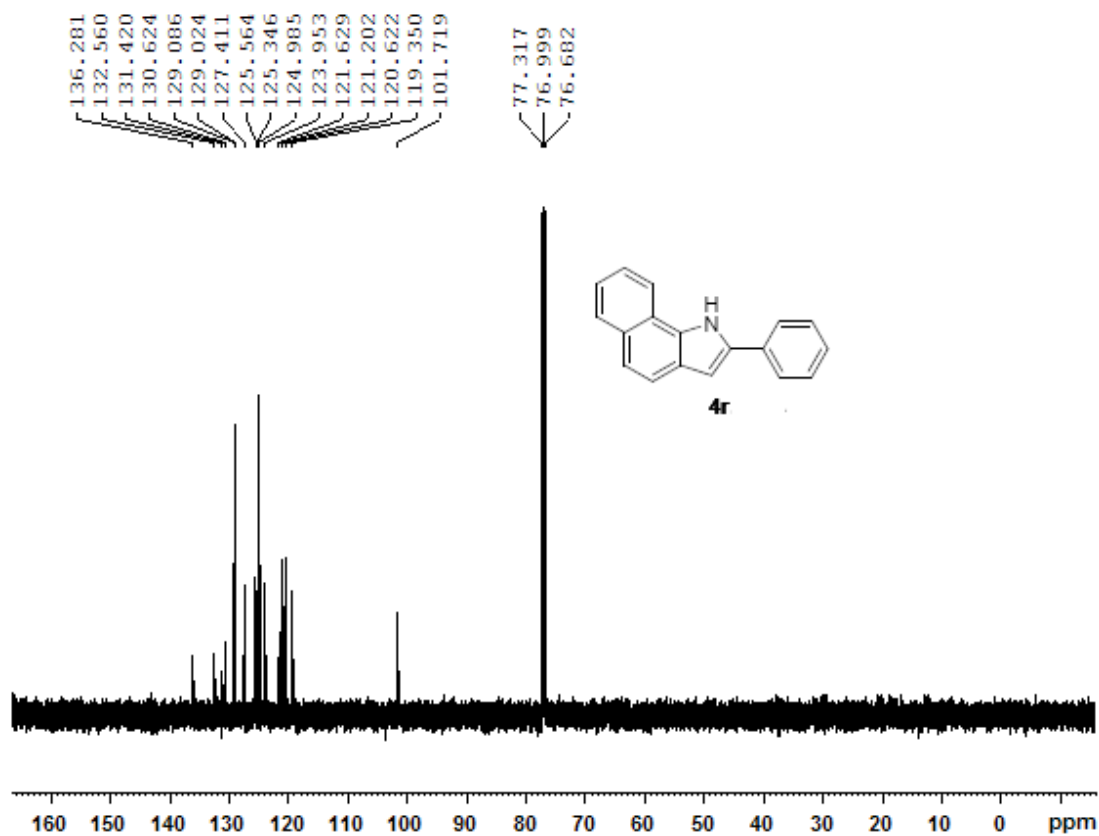

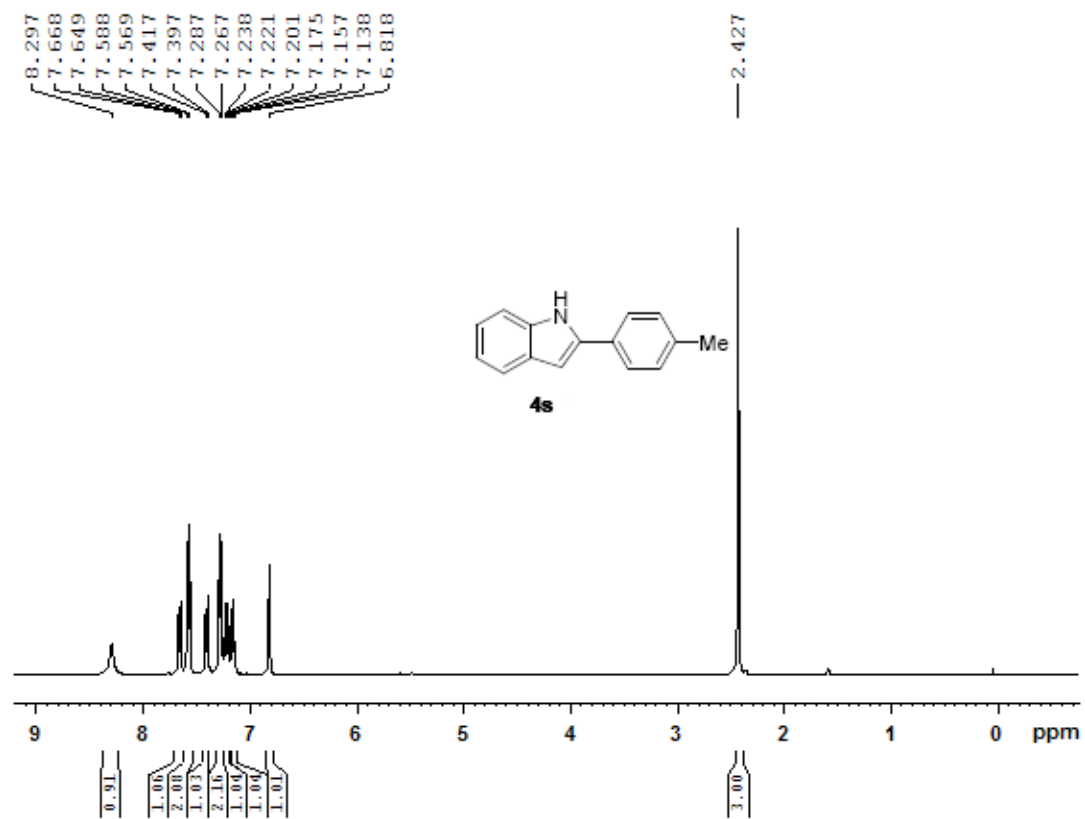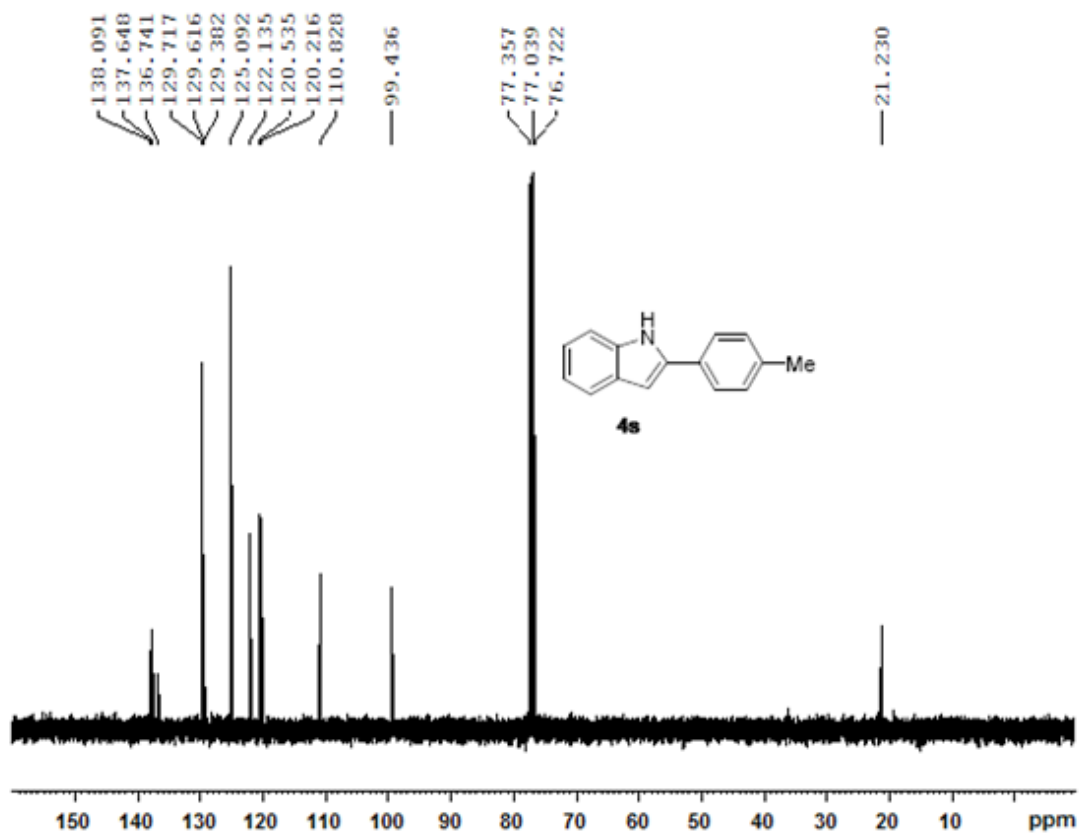



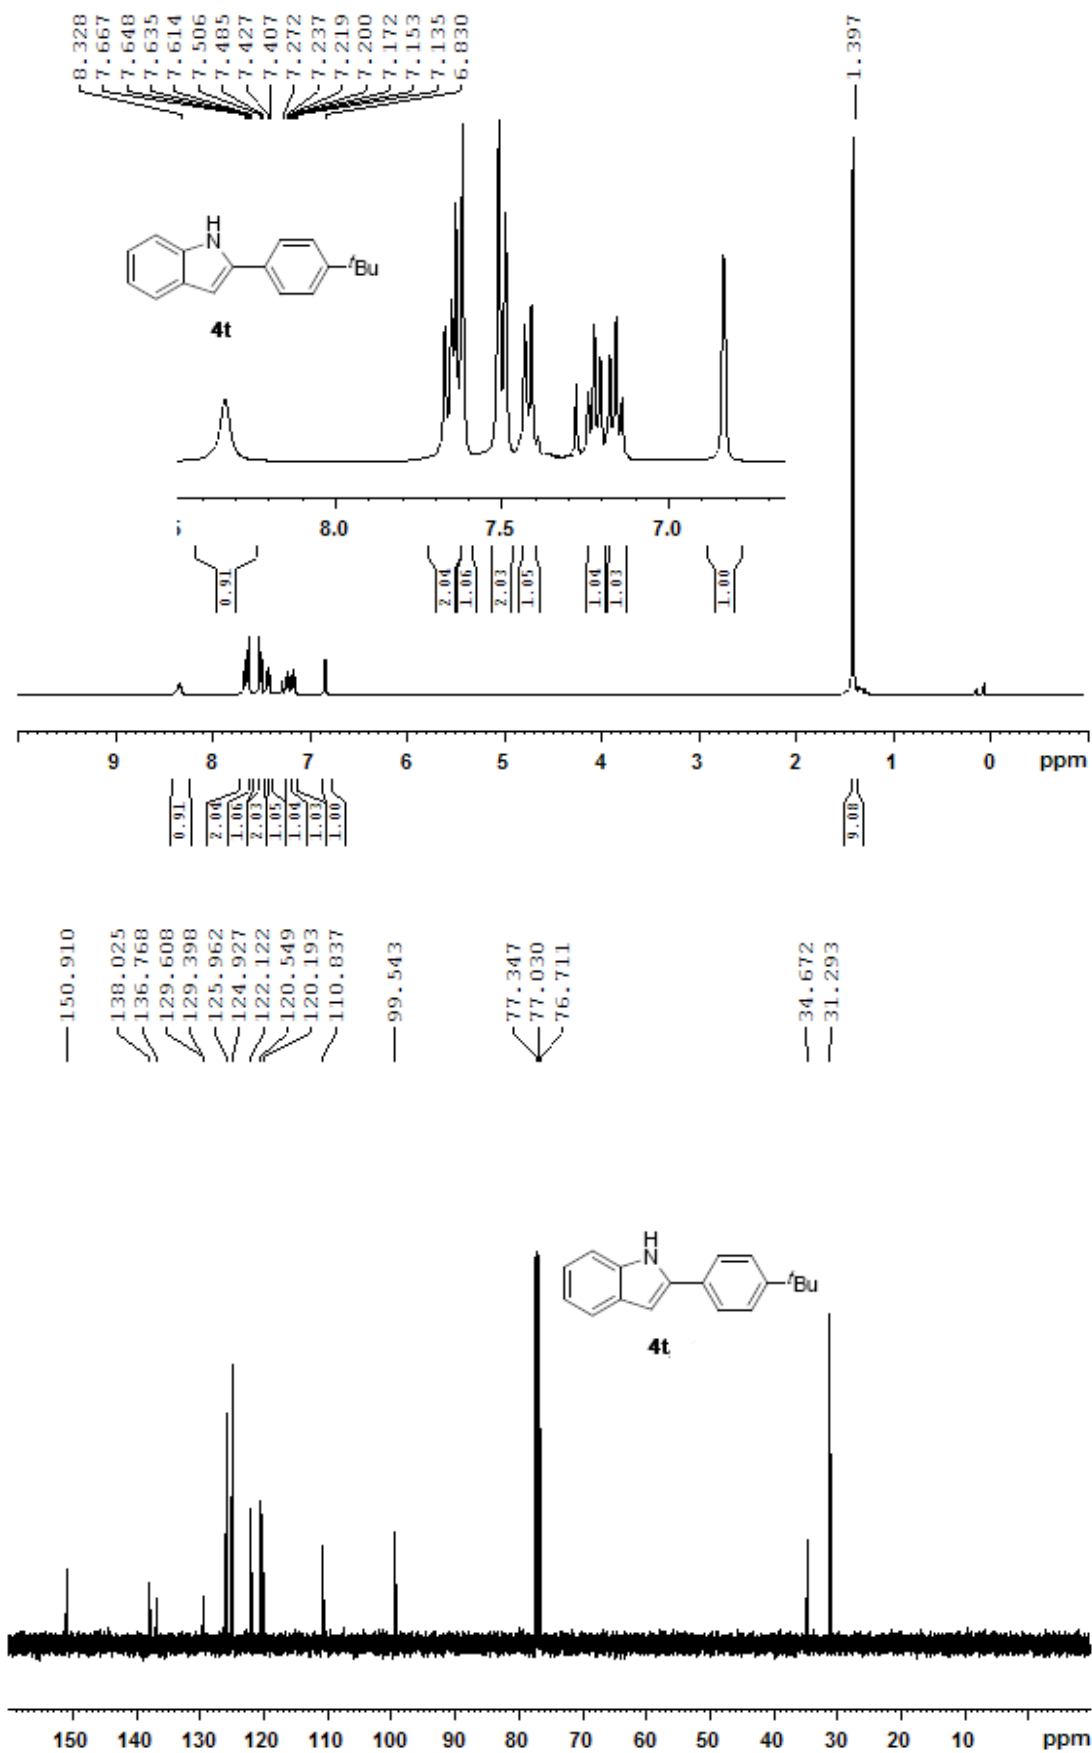

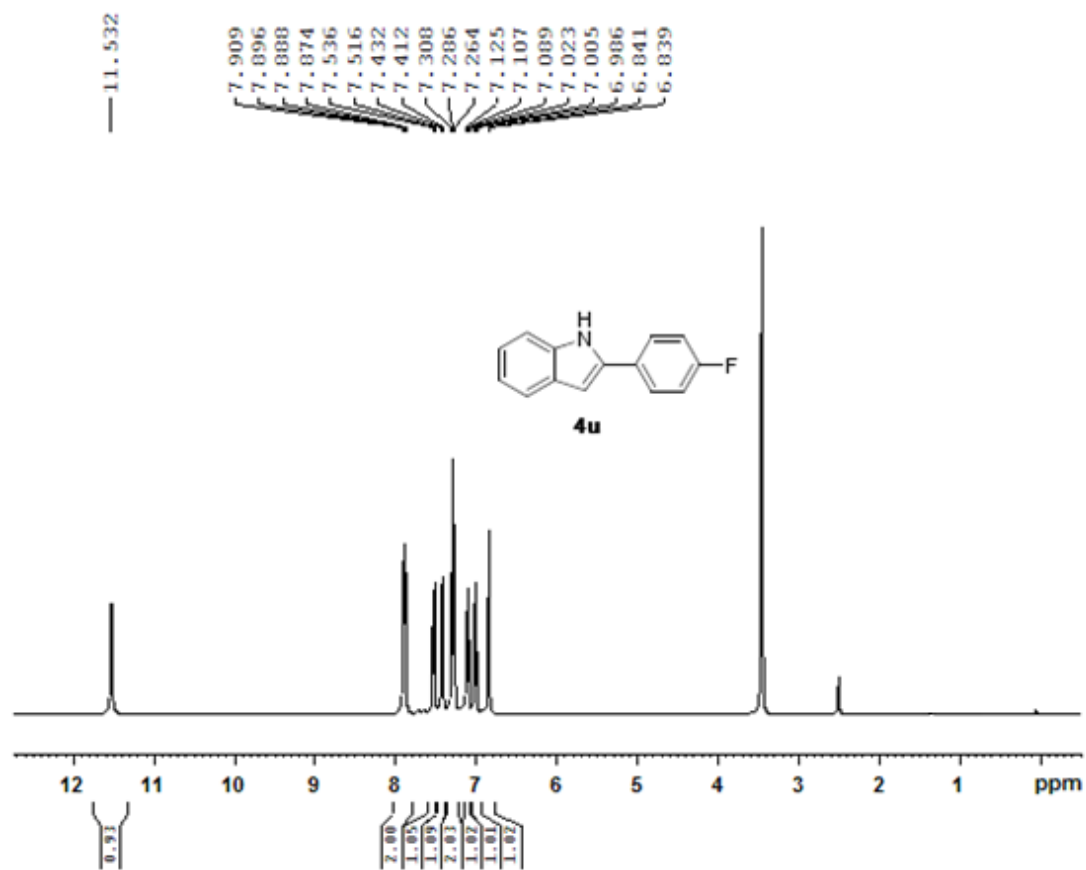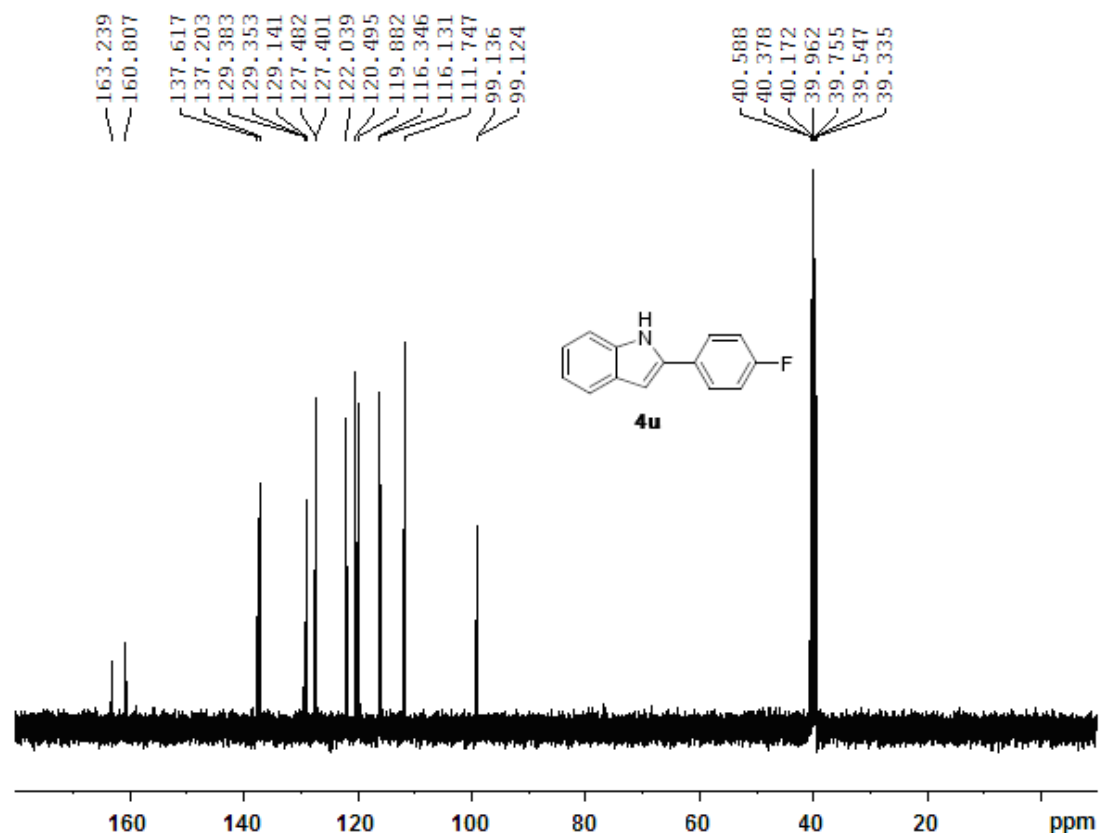

Supplement: c3ra40669e.pdf [file c3ra40669e.pdf]
